# Supplementary material for: The vicinal functionalization of olefins: a facile route to the direct synthesis of β-chlorohydrins and β-chloroethers
Source: Royal Society of Chemistry journal article supplement (doi:10.1039/c4ra01641f), 2014-01-01
Supplement: c4ra01641f1.pdf [file c4ra01641f1.pdf]

## Supporting Information

# Vicinal functionalization of olefins: a facile route to direct synthesis of $\beta$ -chlorohydrins and $\beta$ -chloroethers

Peraka Swamy,<sup>a</sup> Macharla Arun Kumar,<sup>a</sup> Marri Mahender Reddy,<sup>a</sup> Mamedda Naresh,<sup>a</sup> Kodumuri Srujana,<sup>a</sup> and Nama Narender<sup>\*a</sup>

<sup>a</sup> *I&PC Division, CSIR-Indian Institute of Chemical Technology, Hyderabad 500 007, India*  
Tel.: +91-40-27191703; Fax: +91-40-27160387/27160757; E-mail: [narendern33@yahoo.co.in](mailto:narendern33@yahoo.co.in)

### Table of contents

|                                                                         |                |
|-------------------------------------------------------------------------|----------------|
| <b>1. General information and procedure.....</b>                        | <b>S2</b>      |
| <b>1. <sup>1</sup>H, <sup>13</sup>C NMR and Mass Spectral data.....</b> | <b>S3-S17</b>  |
| <b>2. Copies of <sup>1</sup>H and <sup>13</sup>C NMR Spectra .....</b>  | <b>S18-S63</b> |
| <b>3. Notes and References.....</b>                                     | <b>S64</b>     |

## General information

All chemicals used were reagent grade and used as received without further purification.  $^1\text{H}$  NMR spectra were recorded at 300 or 500 MHz and  $^{13}\text{C}$  NMR spectra at 75 or 125 MHz in  $\text{CDCl}_3$ . The chemical shifts ( $\delta$ ) are reported in ppm units relative to TMS as an internal standard for  $^1\text{H}$  NMR and  $\text{CDCl}_3$  for  $^{13}\text{C}$  NMR spectra. Coupling constants ( $J$ ) are reported in hertz (Hz) and multiplicities are indicated as follows: s (singlet), br s (broad singlet), d (doublet), dd (doublet of doublet), m (multiplet). Column chromatography was carried out using silica gel (100-200 mesh) and TLC inspections were performed on Silica gel 60 F<sub>254</sub> plates.

## Typical procedure for vicinal functionalization of olefins

Oxone® (2.2 mmol) was slowly added to a well stirred solution of  $\text{NH}_4\text{Cl}$  (2.2 mmol) and olefin (2 mmol) in acetone- $\text{H}_2\text{O}$  (1:1; 10 mL) or methanol (5 mL) and the reaction mixture was allowed to stir at room temperature, until olefin was completely disappeared (monitored by TLC, eluent: *n*-hexane-ethyl acetate). The organic layer was separated, and the aqueous phase was extracted with ethyl acetate (2x15 mL). The combined organic layers were dried over anhydrous  $\text{Na}_2\text{SO}_4$ , filtered, and concentrated. The residue was purified by column chromatography on silica gel using *n*-hexane-ethyl acetate as eluent to give desired products.

## <sup>1</sup>H, <sup>13</sup>C NMR and Mass Spectral data

### 2-Chloro-1-phenylethanol (2a)<sup>1</sup>

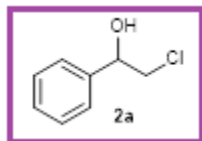

95% yield, colourless liquid.

<sup>1</sup>H NMR (300 MHz, CDCl<sub>3</sub>):  $\delta$  (ppm) = 7.40-7.25 (m, 5 H), 4.90-4.76 (m, 1 H), 3.69 (dd,  $J$  = 11.33, 3.02 Hz, 1 H), 3.58 (dd,  $J$  = 11.33, 9.06 Hz, 1 H), 2.72 (br s, 1 H).

<sup>13</sup>C NMR (75 MHz, CDCl<sub>3</sub>):  $\delta$  (ppm) = 139.89, 128.52, 128.31, 125.96, 73.92, 50.61.

### 2-Chloro-1-(4-bromophenyl)ethanol (2b)

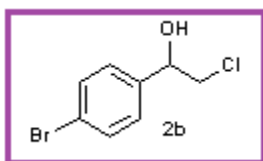

90% yield, white solid, m.p. 59-61 °C.

<sup>1</sup>H NMR (500 MHz, CDCl<sub>3</sub>):  $\delta$  (ppm) = 7.51 (d,  $J$  = 8.30 Hz, 2 H), 7.27 (d,  $J$  = 8.30 Hz, 2 H), 4.87 (dd,  $J$  = 8.30, 2.83 Hz, 1 H), 3.71 (dd,  $J$  = 11.14, 3.39 Hz, 1 H), 3.60 (dd,  $J$  = 11.33, 8.49 Hz, 1 H), 2.81 (br s, 1 H).

<sup>13</sup>C NMR (125 MHz, CDCl<sub>3</sub>):  $\delta$  (ppm) = 138.96, 131.66, 127.71, 122.21, 73.29, 50.36.

HRMS (EI):  $m/z$  calculated for C<sub>8</sub>H<sub>8</sub>BrClO [M]<sup>+</sup> 235.96036, found: 235.96008.

### 2-Chloro-1-(4-chlorophenyl)ethanol (2c)<sup>2</sup>

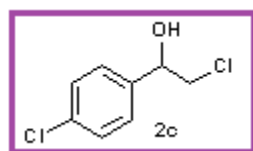

91% yield, colourless liquid.

<sup>1</sup>H NMR (300 MHz, CDCl<sub>3</sub>):  $\delta$  (ppm) = 7.41-7.27 (m, 4 H), 4.88 (d,  $J$  = 8.49 Hz, 1 H), 3.71 (dd,  $J$  = 11.33, 3.58 Hz, 1 H), 3.60 (dd,  $J$  = 11.14, 8.68 Hz, 1 H), 2.77 (br s, 1 H).

<sup>13</sup>C NMR (75 MHz, CDCl<sub>3</sub>):  $\delta$  (ppm) = 138.31, 134.00, 128.66, 127.35, 73.19, 50.32.

### 2-Chloro-1-(4-carboxyphenyl)ethanol (2d)

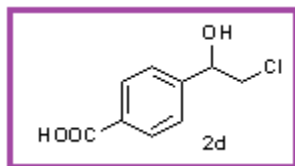

81% yield, colourless liquid.

$^1\text{H NMR}$  (300 MHz,  $\text{CDCl}_3$ ):  $\delta$  (ppm) = 8.07 (d,  $J = 8.30$  Hz, 2 H), 7.48 (d,  $J = 8.30$  Hz, 2 H), 4.96 (dd,  $J = 8.30, 3.77$  Hz, 1 H), 3.80-3.61 (m, 2 H), 1.26 (br s, 1 H).

$^{13}\text{C NMR}$  (125 MHz,  $\text{CDCl}_3$ ):  $\delta$  (ppm) = 168.42, 145.11, 130.48, 130.11, 125.99, 73.50, 50.43.

HRMS (EI):  $m/z$  calculated for  $\text{C}_9\text{H}_9\text{ClO}_3$   $[\text{M}]^+$  200.02402, found: 200.02351.

### 2-Chloro-1-(3-nitrophenyl)ethanol (2e)

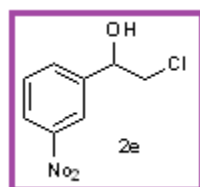

83% yield, colourless liquid.

$^1\text{H NMR}$  (300 MHz,  $\text{CDCl}_3$ ):  $\delta$  (ppm) = 8.29 (s, 1 H), 8.18 (d,  $J = 8.30$  Hz, 1 H), 7.75 (d,  $J = 7.74$  Hz, 1 H), 7.57 (t,  $J = 7.93$  Hz, 1 H), 5.05 (t,  $J = 3.77$  Hz, 1 H), 3.86-3.76 (m, 1 H), 3.74-3.62 (m, 1 H), 3.17 (d,  $J = 2.26$  Hz, 1 H).

$^{13}\text{C NMR}$  (75 MHz,  $\text{CDCl}_3$ ):  $\delta$  (ppm) = 148.22, 142.05, 132.16, 129.54, 123.20, 121.13, 72.72, 50.14.

HRMS (EI):  $m/z$  calculated for  $\text{C}_8\text{H}_8\text{ClNO}_3$   $[\text{M}]^+$  201.01927, found: 201.01920.

### 2-Chloro-1-(4-methylphenyl)ethanol (2f)<sup>2</sup>

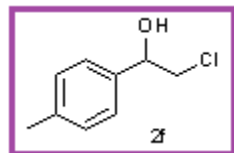

83% yield, colourless liquid.

$^1\text{H NMR}$  (500 MHz,  $\text{CDCl}_3$ ):  $\delta$  (ppm) = 7.27 (d,  $J = 7.99$  Hz, 2 H), 7.18 (d,  $J = 7.99$  Hz, 2 H), 4.86 (dd,  $J = 8.99, 2.99$  Hz, 1 H), 3.72 (dd,  $J = 10.99, 3.99$  Hz, 1 H), 3.64 (dd,  $J = 10.99, 8.99$  Hz, 1 H), 2.62 (br s, 1 H), 2.35 (s, 3 H).

$^{13}\text{C NMR}$  (75 MHz,  $\text{CDCl}_3$ ):  $\delta$  (ppm) = 138.10, 136.96, 129.21, 125.89, 73.83, 50.66, 21.05.

### 2-Chloro-1-(2,4-dimethylphenyl)ethanol (2g)

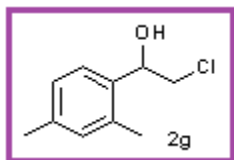

72% yield, colourless liquid.

$^1\text{H}$  NMR (300 MHz,  $\text{CDCl}_3$ ):  $\delta$  (ppm) = 7.39 (d,  $J$  = 7.74 Hz, 1 H), 7.05 (d,  $J$  = 7.93 Hz, 1 H), 6.98 (s, 1 H), 5.07 (d,  $J$  = 8.87 Hz, 1 H), 3.72-3.64 (m, 1 H), 3.62-3.53 (m, 1 H), 2.65 (d,  $J$  = 2.45 Hz, 1 H), 2.31 (s, 6 H).

$^{13}\text{C}$  NMR (75 MHz,  $\text{CDCl}_3$ ):  $\delta$  (ppm) = 137.72, 134.99, 134.53, 131.22, 126.97, 125.40, 70.69, 49.69, 20.89, 18.81.

HRMS (EI):  $m/z$  calculated for  $\text{C}_{10}\text{H}_{13}\text{ClO}$   $[\text{M}]^+$  184.06549, found: 184.06530.

### 2-Chloro-1-(4-methoxyphenyl)ethanol (2h)<sup>2</sup>

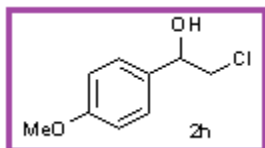

82% yield, colourless liquid.

$^1\text{H}$  NMR (300 MHz,  $\text{CDCl}_3$ ):  $\delta$  (ppm) = 7.31 (d,  $J$  = 8.68 Hz, 2 H), 6.90 (d,  $J$  = 8.68 Hz, 2 H), 4.85 (d,  $J$  = 8.49 Hz, 1 H), 3.81 (s, 3 H), 3.74-3.58 (m, 2 H), 2.65 (d,  $J$  = 2.26 Hz, 1 H).

$^{13}\text{C}$  NMR (75 MHz,  $\text{CDCl}_3$ ):  $\delta$  (ppm) = 159.51, 132.09, 127.24, 113.93, 73.58, 55.19, 50.65.

### 2-Chloro-1-(2-naphthyl)ethanol (2i)<sup>2</sup>

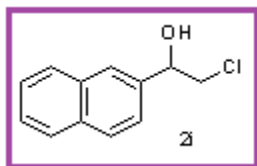

82% yield, white solid, m.p. 65-66 °C.

$^1\text{H}$  NMR (500 MHz,  $\text{CDCl}_3$ ):  $\delta$  (ppm) = 7.89-7.81 (m, 4 H), 7.53-7.45 (m, 3 H), 5.07 (d,  $J$  = 8.69 Hz, 1 H), 3.83 (d,  $J$  = 11.29, 3.35 Hz, 1 H), 3.76-3.70 (m, 1 H), 2.80 (d,  $J$  = 2.74 Hz, 1 H).

$^{13}\text{C}$  NMR (125 MHz,  $\text{CDCl}_3$ ):  $\delta$  (ppm) = 137.23, 133.23, 133.13, 128.44, 127.99, 127.67, 126.34, 126.23, 125.21, 123.60, 74.12, 50.70.

### 1-Chloro-2-phenylpropan-2-ol (2j)<sup>3</sup>

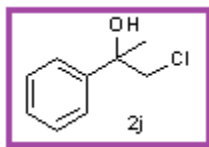

91% yield, colourless liquid.

<sup>1</sup>H NMR (300 MHz, CDCl<sub>3</sub>):  $\delta$  (ppm) = 7.50-7.43 (m, 2 H), 7.42-7.33 (m, 2 H), 7.34-7.26 (m, 1 H), 3.84 (d,  $J$  = 11.33 Hz, 1 H), 3.76 (d,  $J$  = 11.33 Hz, 1 H), 2.63 (br s, 1 H), 1.64 (s, 3 H).

<sup>13</sup>C NMR (75 MHz, CDCl<sub>3</sub>):  $\delta$  (ppm) = 144.06, 128.33, 127.44, 124.86, 73.78, 55.26, 27.19.

### 1-Chloro-2-(4-chlorophenyl)propan-2-ol (2k)

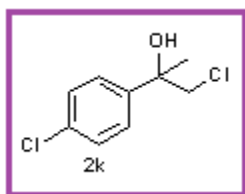

77% yield, light yellow liquid.

<sup>1</sup>H NMR (500 MHz, CDCl<sub>3</sub>):  $\delta$  (ppm) = 7.40 (d,  $J$  = 8.24 Hz, 2 H), 7.33 (d,  $J$  = 8.24 Hz, 2 H), 3.79 (d,  $J$  = 10.99 Hz, 1 H), 3.72 (d,  $J$  = 10.99 Hz, 1 H), 2.62 (br s, 1 H), 1.61 (s, 3 H).

<sup>13</sup>C NMR (75 MHz, CDCl<sub>3</sub>):  $\delta$  (ppm) = 142.63, 133.29, 128.44, 126.46, 73.54, 54.95, 27.20.

HRMS (EI):  $m/z$  calculated for C<sub>9</sub>H<sub>10</sub>Cl<sub>2</sub>O [M]<sup>+</sup> 204.01087, found: 204.01070.

### 1-Chloro-2-octanol (2l')<sup>4</sup>

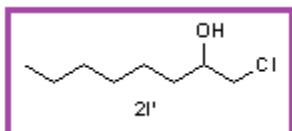

75% yield, colourless liquid.

<sup>1</sup>H NMR (500 MHz, CDCl<sub>3</sub>):  $\delta$  (ppm) = 3.84-3.76 (m, 1 H), 3.64 (dd,  $J$  = 10.98, 3.2 Hz, 1 H), 3.48 (dd,  $J$  = 10.98, 7.01 Hz, 1 H), 2.20 (br s, 1 H), 1.59-1.39 (m, 3 H), 1.40-1.23 (m, 7 H), 0.92-0.84 (m, 3 H).

<sup>13</sup>C NMR (125 MHz, CDCl<sub>3</sub>):  $\delta$  (ppm) = 71.38, 50.43, 34.15, 31.63, 29.10, 25.41, 22.50, 13.97.

### 2-Chloro-1-octanol (2l'')<sup>4</sup>

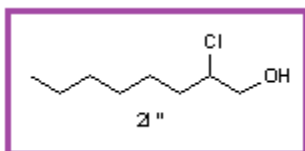

20% yield, colourless liquid.

$^1\text{H}$  NMR (500 MHz,  $\text{CDCl}_3$ ):  $\delta$  (ppm) = 4.06-3.99 (m, 1 H), 3.83-3.75 (m, 1 H), 3.71-3.63 (m, 1 H), 2.09-2.03 (m, 1 H), 1.81-1.67 (m, 2 H), 1.58-1.48 (m, 1 H), 1.47-1.23 (m, 7 H), 0.93-0.86 (m, 3 H).

$^{13}\text{C}$  NMR (125 MHz,  $\text{CDCl}_3$ ):  $\delta$  (ppm) = 66.97, 65.34, 34.22, 31.56, 28.72, 26.24, 22.49, 13.98.

### 1-Phenyl-2-chloro-1-propanol (2m)<sup>5</sup>

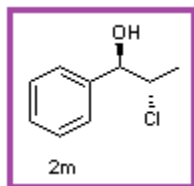

Major diastereomer (anti): 61% yield, colourless liquid.

$^1\text{H}$  NMR (500 MHz,  $\text{CDCl}_3$ ):  $\delta$  (ppm) = 7.54-7.27 (m, 5 H), 4.94 (t,  $J = 3.02$  Hz, 1 H), 4.39-4.25 (m, 1 H), 2.48 (d,  $J = 3.02$  Hz, 1 H), 1.38 (d,  $J = 6.79$  Hz, 3 H).

$^{13}\text{C}$  NMR (75 MHz,  $\text{CDCl}_3$ ):  $\delta$  (ppm) = 139.55, 128.29, 127.97, 126.34, 77.09, 62.66, 18.03.

### 2-Chloro-3-phenyl-1,3-propanediol (2n)

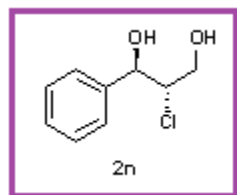

Major diastereomer (anti): 74% yield, light yellow liquid.

$^1\text{H}$  NMR (300 MHz,  $\text{CDCl}_3$ ):  $\delta$  (ppm) = 7.42-7.30 (m, 5 H), 4.97 (d,  $J = 5.93$  Hz, 1 H), 4.24-4.14 (m, 1 H), 3.96 (dd,  $J = 12.85, 3.95$  Hz, 1 H), 3.87 (dd,  $J = 11.86, 3.95$  Hz, 1 H), 2.37 (br s, 2 H).

$^{13}\text{C}$  NMR (75 MHz,  $\text{CDCl}_3$ ):  $\delta$  (ppm) = 140.10, 128.29, 128.14, 126.55, 76.04, 65.19, 63.74.

HRMS (EI):  $m/z$  calculated for  $\text{C}_9\text{H}_{11}\text{ClO}_2$   $[\text{M}]^+$  186.04476, found: 186.04396.

### 2-Chloro-3-hydroxy-3-phenylpropyl acetate (2o)

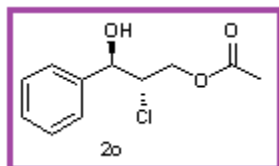

Major diastereomer (anti): 60.5 % yield, colourless liquid.

$^1\text{H}$  NMR (300 MHz,  $\text{CDCl}_3$ ):  $\delta$  (ppm) = 7.47-7.28 (m, 5 H), 4.93 (d,  $J = 5.28$  Hz, 1 H), 4.49-4.38 (m, 1 H), 4.37-4.24 (m, 2 H), 2.85 (br s, 1 H), 2.04 (s, 3 H).

$^{13}\text{C}$  NMR (75 MHz,  $\text{CDCl}_3$ ):  $\delta$  (ppm) = 170.91, 139.26, 128.35, 128.23, 126.40, 74.62, 64.09, 62.57, 20.53.

HRMS (EI):  $m/z$  calculated for  $\text{C}_{11}\text{H}_{13}\text{ClO}_3$   $[\text{M}]^+$  228.05532, found: 228.05519.

### Methyl 2-chloro-3-hydroxy-3-phenylpropanoate (2q)<sup>1</sup>

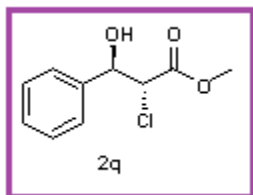

Major diastereomer (anti): 21% yield, light yellow liquid.

$^1\text{H}$  NMR (500 MHz,  $\text{CDCl}_3$ ):  $\delta$  (ppm) = 7.45-7.31 (m, 5 H), 5.03 (dd,  $J = 7.78, 3.05$  Hz, 1 H), 4.38 (d,  $J = 7.93$  Hz, 1 H), 3.79 (s, 3 H), 3.14 (br s, 1 H).

$^{13}\text{C}$  NMR (75 MHz,  $\text{CDCl}_3$ ):  $\delta$  (ppm) = 169.31, 138.62, 128.75, 128.47, 126.87, 75.25, 58.91, 53.06.

### 2-Chloro-1,2-diphenylethanol (2t)<sup>1</sup>

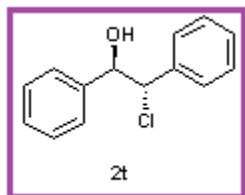

Major diastereomer (anti): 37% yield, colourless liquid.

$^1\text{H}$  NMR (300 MHz,  $\text{CDCl}_3$ ):  $\delta$  (ppm) = 7.36-7.25 (m, 10 H), 5.08 (d,  $J = 6.79$  Hz, 1 H), 5.00 (d,  $J = 6.79$  Hz, 1 H), 2.35 (br s, 1 H).

$^{13}\text{C}$  NMR (75 MHz,  $\text{CDCl}_3$ ):  $\delta$  (ppm) = 139.44, 137.19, 128.65, 128.40, 128.30, 128.10, 127.03, 78.10, 66.83.

### 2-Chloro-1,2-diphenylethanol (2u)<sup>1</sup>

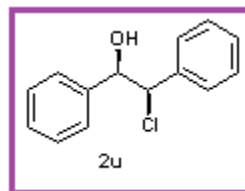

Major diastereomer (syn): 32% yield, colourless liquid.

$^1\text{H}$  NMR (300 MHz,  $\text{CDCl}_3$ ):  $\delta$  (ppm) = 7.27-7.14 (m, 8 H), 7.13-7.06 (m, 2 H), 5.01 (d,  $J = 8.30$  Hz, 1 H), 4.94 (d,  $J = 8.30$  Hz, 1 H), 3.08 (br s, 1 H).



$^{13}\text{C}$  NMR (75 MHz,  $\text{CDCl}_3$ ):  $\delta$  (ppm) = 138.51, 137.68, 128.51, 128.29, 128.12, 127.94, 126.94, 78.74, 70.64.

#### 2-Chloroindan-1-ol (2v)<sup>4</sup>

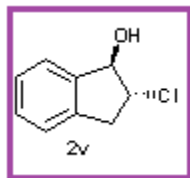

Major diastereomer (anti): 62.33% yield, colourless liquid.

$^1\text{H}$  NMR (500 MHz,  $\text{CDCl}_3$ ):  $\delta$  (ppm) = 7.44-7.37 (m, 1 H), 7.33-7.27 (m, 2 H), 7.24-7.17 (m, 1 H), 5.20 (d,  $J$  = 5.00 Hz, 1 H), 4.29 (dd,  $J$  = 13.01, 7.00 Hz, 1 H), 3.51 (dd,  $J$  = 16.01, 7.00 Hz, 1 H), 3.09 (dd,  $J$  = 16.01, 7.00 Hz, 1 H), 2.35 (br s, 1 H).

$^{13}\text{C}$  NMR (75 MHz,  $\text{CDCl}_3$ ):  $\delta$  (ppm) = 141.32, 138.95, 128.96, 127.57, 124.63, 124.10, 82.95, 64.56, 39.75.

#### 2-Chloro-1,2,3,4-tetrahydro-1-naphthol (2w)<sup>6</sup>

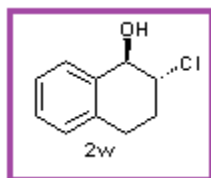

Major diastereomer (anti): 68% yield, white solid, m.p. 91-93 °C.

$^1\text{H}$  NMR (300 MHz,  $\text{CDCl}_3$ ):  $\delta$  (ppm) = 7.57-7.48 (m, 1 H), 7.30-7.19 (m, 2 H), 7.16-7.07 (m, 1 H), 4.78 (d,  $J$  = 6.79 Hz, 1 H), 4.27-4.16 (m, 1 H), 3.06-2.83 (m, 1 H), 2.60 (br s, 1 H), 2.48-2.35 (m, 1 H), 2.24-2.08 (m, 1 H).

$^{13}\text{C}$  NMR (75 MHz,  $\text{CDCl}_3$ ):  $\delta$  (ppm) = 135.44, 134.95, 128.37, 128.17, 127.88, 126.54, 73.83, 62.75, 29.01, 27.18.

#### 2-Chloro cyclohexanol (2x)<sup>7</sup>

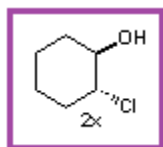

Major diastereomer (anti): 90% yield, colourless liquid.

$^1\text{H}$  NMR (300 MHz,  $\text{CDCl}_3$ ):  $\delta$  (ppm) = 3.81-3.67 (m, 1 H), 3.61-3.46 (m, 1 H), 2.67 (br s, 1 H), 2.31-2.03 (m, 2 H), 1.88-1.57 (m, 3 H), 1.44-1.21 (m, 3 H).

$^{13}\text{C}$  NMR (75 MHz,  $\text{CDCl}_3$ ):  $\delta$  (ppm) = 75.32, 67.49, 35.11, 33.67, 25.63, 23.93.

### 1-(2-Chloro-1-methoxyethyl)benzene (3a)<sup>8</sup>

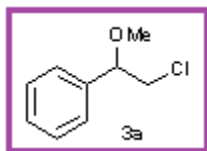

90% yield, colourless liquid.

$^1\text{H}$  NMR (300 MHz,  $\text{CDCl}_3$ ):  $\delta$  (ppm) = 7.43-7.30 (m, 5 H), 4.41-4.33 (m, 1 H), 3.68 (dd,  $J$  = 11.33, 8.30 Hz, 1 H), 3.59 (dd,  $J$  = 11.33, 4.53 Hz, 1 H), 3.32 (s, 3 H).

$^{13}\text{C}$  NMR (75 MHz,  $\text{CDCl}_3$ ):  $\delta$  (ppm) = 138.50, 128.57, 128.45, 126.78, 83.62, 57.14, 48.07.

### 1-Bromo-4-(2-chloro-1-methoxyethyl)benzene (3b)

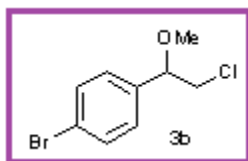

91% yield, colourless liquid.

$^1\text{H}$  NMR (500 MHz,  $\text{CDCl}_3$ ):  $\delta$  (ppm) = 7.52 (d,  $J$  = 8.39 Hz, 2 H), 7.22 (d,  $J$  = 8.39 Hz, 2 H), 4.35-4.30 (m, 1 H), 3.65 (dd,  $J$  = 11.44, 7.47 Hz, 1 H), 3.55 (dd,  $J$  = 11.44, 4.73 Hz, 1 H), 3.31 (s, 3 H).

$^{13}\text{C}$  NMR (75 MHz,  $\text{CDCl}_3$ ):  $\delta$  (ppm) = 137.55, 131.77, 128.56, 122.42, 82.93, 57.27, 47.68.

HRMS (EI):  $m/z$  calculated for  $\text{C}_9\text{H}_{10}\text{BrClO}$   $[\text{M}]^+$  249.97601, found: 249.97589.

### 1-Chloro-4-(2-chloro-1-methoxyethyl)benzene (3c)<sup>8</sup>

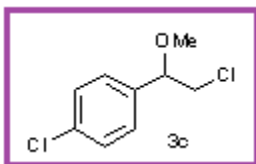

91% yield, colourless liquid.

$^1\text{H}$  NMR (500 MHz,  $\text{CDCl}_3$ ):  $\delta$  (ppm) = 7.36 (d,  $J$  = 8.83 Hz, 2 H), 7.27 (d,  $J$  = 8.83 Hz, 2 H), 4.37-4.31 (m, 1 H), 3.65 (dd,  $J$  = 11.04, 7.72 Hz, 1 H), 3.55 (dd,  $J$  = 11.04, 4.41 Hz, 1 H), 3.31 (s, 3 H).

$^{13}\text{C}$  NMR (75 MHz,  $\text{CDCl}_3$ ):  $\delta$  (ppm) = 137.04, 134.22, 128.79, 128.21, 82.86, 57.21, 47.73.

#### 4-(2-Chloro-1-methoxyethyl)benzoic acid (3d)

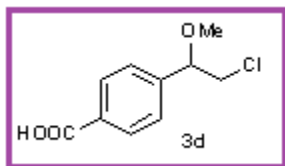

83% yield, white solid, m.p. 98-100 °C.

$^1\text{H NMR}$  (500 MHz,  $\text{CDCl}_3$ ):  $\delta$  (ppm) = 8.15 (d,  $J$  = 8.39 Hz, 2 H), 7.47 (d,  $J$  = 8.24 Hz, 2 H), 4.48-4.43 (m, 1 H), 3.73-3.67 (m, 1 H), 3.65-3.60 (m, 1 H), 3.36 (s, 3 H).

$^{13}\text{C NMR}$  (75 MHz,  $\text{CDCl}_3$ ):  $\delta$  (ppm) = 171.90, 144.70, 130.56, 127.68, 127.04, 83.17, 57.48, 47.52.

HRMS (EI):  $m/z$  calculated for  $\text{C}_{10}\text{H}_{12}\text{ClO}_3$   $[\text{M} + \text{H}]^+$  215.04583, found: 215.04576.

#### 1-(2-Chloro-1-methoxyethyl)-3-nitrobenzene (3e)

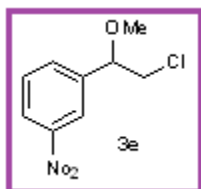

88% yield, white solid, m.p. 54-56 °C.

$^1\text{H NMR}$  (500 MHz,  $\text{CDCl}_3$ ):  $\delta$  (ppm) = 8.25-8.19 (m, 2 H), 7.71 (d,  $J$  = 7.62 Hz, 1 H), 7.59 (t,  $J$  = 7.78 Hz, 1 H), 4.52-4.47 (m, 1 H), 3.75-3.69 (dd,  $J$  = 11.59, 6.71 Hz, 1 H), 3.66-3.61 (dd,  $J$  = 11.59, 5.18 Hz, 1 H), 3.37 (s, 3 H).

$^{13}\text{C NMR}$  (75 MHz,  $\text{CDCl}_3$ ):  $\delta$  (ppm) = 148.39, 140.89, 132.98, 129.60, 123.46, 121.92, 82.41, 57.60, 47.24.

HRMS (EI):  $m/z$  calculated for  $\text{C}_9\text{H}_{11}\text{ClNO}_3$   $[\text{M} + \text{H}]^+$  216.02715, found: 216.02709.

#### 1-(2-Chloro-1-methoxyethyl)-4-methylbenzene (3f)<sup>8</sup>

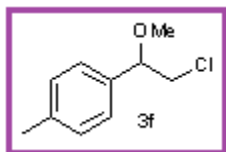

83% yield, colourless liquid.

$^1\text{H NMR}$  (500 MHz,  $\text{CDCl}_3$ ):  $\delta$  (ppm) = 7.24-7.16 (m, 4 H), 4.32 (dd,  $J$  = 7.89, 4.30 Hz, 1 H), 3.69-3.63 (m, 1 H), 3.56 (dd,  $J$  = 11.48, 4.30 Hz, 1 H), 3.30 (s, 3 H), 2.36 (s, 3 H).

$^{13}\text{C NMR}$  (125 MHz,  $\text{CDCl}_3$ ):  $\delta$  (ppm) = 138.20, 135.45, 129.25, 126.71, 83.44, 56.97, 48.09,

21.08.

**1-(2-Chloro-1-methoxyethyl)-2,4-dimethylbenzene (3g)**

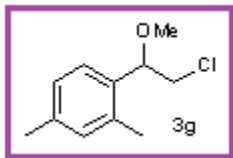

64% yield, colourless liquid.

$^1\text{H NMR}$  (300 MHz,  $\text{CDCl}_3$ ):  $\delta$  (ppm) = 7.27 (d,  $J = 7.55$  Hz, 1 H), 7.05 (d,  $J = 7.55$  Hz, 1 H), 6.99 (s, 1 H), 4.60 (dd,  $J = 8.30, 3.77$  Hz, 1 H), 3.68-3.49 (m, 2 H), 3.29 (s, 3 H), 2.32 (s, 3 H).

$^{13}\text{C NMR}$  (125 MHz,  $\text{CDCl}_3$ ):  $\delta$  (ppm) = 137.72, 135.56, 133.41, 131.38, 127.05, 126.01, 80.32, 56.93, 47.37, 20.91, 18.88.

HRMS (EI):  $m/z$  calculated for  $\text{C}_{11}\text{H}_{15}\text{ClO}$   $[\text{M}]^+$  198.08114, found: 198.08115.

**1-(2-Chloro-1-methoxyethyl)-4-methoxybenzene (3h)**

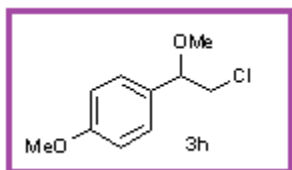

84% yield, light yellow liquid.

$^1\text{H NMR}$  (300 MHz,  $\text{CDCl}_3$ ):  $\delta$  (ppm) = 7.25 (d,  $J = 9.06$  Hz, 2 H), 6.91 (d,  $J = 8.30$  Hz, 2 H), 4.36-4.26 (m, 1 H), 3.81 (s, 3 H), 3.66 (dd,  $J = 11.33, 8.30$  Hz, 1 H), 3.55 (dd,  $J = 11.33, 4.53$  Hz, 1 H), 3.28 (s, 3 H).

$^{13}\text{C NMR}$  (75 MHz,  $\text{CDCl}_3$ ):  $\delta$  (ppm) = 159.63, 130.40, 127.99, 113.92, 83.09, 56.86, 55.14, 48.10.

HRMS (EI):  $m/z$  calculated for  $\text{C}_{10}\text{H}_{13}\text{ClO}_2$   $[\text{M}]^+$  200.06041, found: 200.06084.

**2-(2-Chloro-1-methoxyethyl)naphthalene (3i)**

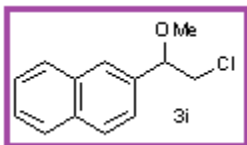

90% yield, yellow liquid.

$^1\text{H NMR}$  (300 MHz,  $\text{CDCl}_3$ ):  $\delta$  (ppm) = 7.92-7.82 (m, 3 H), 7.80 (s, 1 H), 7.55-7.47 (m, 2 H), 7.44 (dd,  $J = 8.49, 1.32$  Hz, 1 H), 4.57-4.49 (m, 1 H), 3.82-3.62 (m, 2 H), 3.36 (s, 3 H).

$^{13}\text{C NMR}$  (75 MHz,  $\text{CDCl}_3$ ):  $\delta$  (ppm) = 135.88, 133.37, 133.08, 128.58, 127.88, 127.70, 126.45,

126.33, 126.25, 124.01, 83.76, 57.24, 47.97.

HRMS (EI):  $m/z$  calculated for  $C_{13}H_{13}ClO$   $[M]^+$  220.06549, found: 220.06502.

**(2-Chloro-1-methoxy-1-methylethyl)-benzene (3j)**<sup>8</sup>

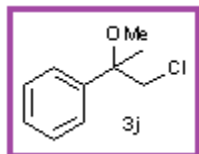

68% yield, colourless liquid.

$^1H$  NMR (300 MHz,  $CDCl_3$ ):  $\delta$  (ppm) = 7.45-7.27 (m, 5 H), 3.72 (d,  $J$  = 11.33 Hz, 1 H), 3.59 (d,  $J$  = 11.33 Hz, 1 H), 3.14 (s, 3 H), 1.69 (s, 3 H).

$^{13}C$  NMR (75 MHz,  $CDCl_3$ ):  $\delta$  (ppm) = 141.69, 128.41, 127.80, 126.44, 78.61, 53.39, 50.89, 20.65.

**1-Chloro-4-(2-chloro-1-methoxy-1-methylethyl)benzene (3k)**

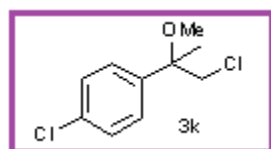

83% yield, colourless liquid.

$^1H$  NMR (500 MHz,  $CDCl_3$ ):  $\delta$  (ppm) = 7.41-7.30 (m, 4 H), 3.66 (d,  $J$  = 11.04 Hz, 1 H), 3.56 (d,  $J$  = 12.14 Hz, 1 H), 3.14 (s, 3 H), 1.66 (s, 3 H).

$^{13}C$  NMR (75 MHz,  $CDCl_3$ ):  $\delta$  (ppm) = 140.28, 133.69, 128.53, 127.94, 78.32, 52.96, 50.85, 20.60.

HRMS (EI):  $m/z$  calculated for  $C_{10}H_{11}Cl_2O$   $[M - H]^+$  217.01870, found: 217.01861.

**1-Chloro-2-methoxyoctane (3l') & 2-chloro-1-methoxyoctane (3l'')**

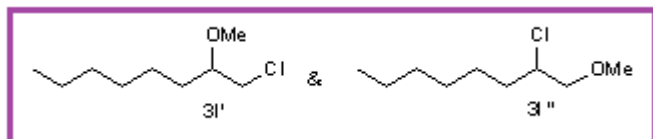

82% yield (obtained as a mixture of regioisomers **3l'** and **3l''**), colourless liquid.

$^1H$  NMR (300 MHz,  $CDCl_3$ ):  $\delta$  (ppm) = 4.04-3.93 (m, 1 H), 3.61-3.48 (m, 5 H), 3.42 (s, 3 H), 3.40 (s, 3 H), 3.39-3.31 (m, 1 H), 1.90-1.20 (m, 20 H), 0.96-0.82 (m, 6 H).

$^{13}C$  NMR (75 MHz,  $CDCl_3$ ):  $\delta$  (ppm) = 80.67, 76.65, 60.54, 58.99, 57.39, 45.55, 34.70, 31.91, 31.68, 31.59, 29.23, 28.71, 26.03, 25.04, 22.51, 13.99.

HRMS (EI):  $m/z$  calculated for  $C_9H_{19}ClO$   $[M]^+$  178.11244, found: 178.11234.

### 2-Chloro-1-methoxy-1-phenylpropane (3m)

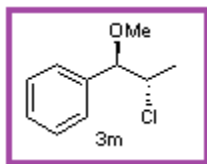

Major diastereomer (anti): 67% yield, light yellow liquid.

$^1\text{H NMR}$  (300 MHz,  $\text{CDCl}_3$ ):  $\delta$  (ppm) = 7.41-7.29 (m, 5 H), 4.26 (d,  $J = 5.28$  Hz, 1 H), 4.21-4.09 (m, 1 H), 3.31 (s, 3 H), 1.48 (d,  $J = 6.79$  Hz, 3 H).

$^{13}\text{C NMR}$  (75 MHz,  $\text{CDCl}_3$ ):  $\delta$  (ppm) = 138.07, 128.31, 128.13, 127.47, 87.16, 60.08, 57.42, 19.80.

HRMS (EI):  $m/z$  calculated for  $\text{C}_{10}\text{H}_{14}\text{ClO}$  [ $\text{M} + \text{H}$ ] $^+$  185.07332, found: 185.07332.

### 2-Chloro-3-methoxy-3-phenylpropan-1-ol (3n)

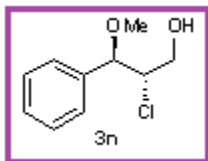

Major diastereomer (anti): 59% yield, colourless liquid.

$^1\text{H NMR}$  (500 MHz,  $\text{CDCl}_3$ ):  $\delta$  (ppm) = 7.42-7.32 (m, 5 H), 4.39 (d,  $J = 6.99$  Hz), 4.12-4.06 (m, 1 H), 3.99-3.88 (m, 2 H), 2.55 (br s, 1 H).

$^{13}\text{C NMR}$  (125 MHz,  $\text{CDCl}_3$ ):  $\delta$  (ppm) = 137.71, 128.50, 128.40, 127.54, 85.52, 64.55, 64.28, 57.35.

HRMS (EI):  $m/z$  calculated for  $\text{C}_{10}\text{H}_{13}\text{ClO}_2$  [ $\text{M}$ ] $^+$  200.06041, found: 200.06085.

### 2-Chloro-3-methoxy-3-phenylpropyl acetate (3o)

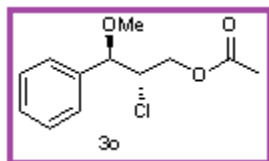

Major diastereomer (anti): 55% yield, colourless liquid.

$^1\text{H NMR}$  (500 MHz,  $\text{CDCl}_3$ ):  $\delta$  (ppm) = 7.42-7.32 (m, 5 H), 4.46-4.41 (m, 1 H), 4.40-4.30 (m, 2 H), 4.25-4.20 (m, 1 H), 3.27 (s, 3 H), 2.08 (s, 3 H).

$^{13}\text{C NMR}$  (125 MHz,  $\text{CDCl}_3$ ):  $\delta$  (ppm) = 170.50, 137.22, 128.46, 128.32, 127.53, 83.81, 64.61, 61.09, 57.36, 20.53.

HRMS (EI):  $m/z$  calculated for  $\text{C}_{11}\text{H}_{12}\text{ClO}_2$  [ $\text{M} - \text{OMe}$ ] $^+$  211.05258, found: 211.05250.

### 2-Chloro-3-methoxy-3-phenylpropanoic acid (3p)

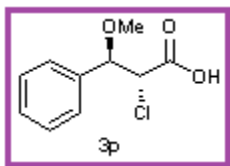

Major diastereomer (anti): 51% yield, white solid, m.p. 162-163 °C.

$^1\text{H}$  NMR (500 MHz,  $\text{CDCl}_3$ ):  $\delta$  (ppm) = 7.44-7.37 (m, 5 H), 4.53 (d,  $J$  = 8.85 Hz, 1 H), 4.31 (d,  $J$  = 8.69 Hz, 1 H), 3.29 (s, 3 H).

$^{13}\text{C}$  NMR (75 MHz,  $\text{CDCl}_3$ ):  $\delta$  (ppm) = 169.36, 136.06, 128.06, 127.65, 127.38, 83.42, 58.57, 56.63.

HRMS (EI):  $m/z$  calculated for  $\text{C}_9\text{H}_8\text{ClO}_2$  [ $\text{M} - \text{OMe}$ ] $^+$  183.02128, found: 183.02125.

### Methyl 2-chloro-3-methoxy-3-phenylpropanoate (3q)

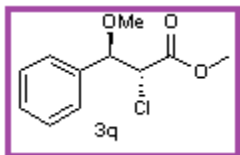

Major diastereomer (anti): 74% yield, colourless liquid.

$^1\text{H}$  NMR (500 MHz,  $\text{CDCl}_3$ ):  $\delta$  (ppm) = 7.41-7.36 (m, 5 H), 4.51 (d,  $J$  = 9.30 Hz, 1 H), 4.27 (d,  $J$  = 9.15 Hz, 1 H), 3.84 (s, 3 H), 3.23 (s, 3 H).

$^{13}\text{C}$  NMR (75 MHz,  $\text{CDCl}_3$ ):  $\delta$  (ppm) = 169.11, 136.38, 128.87, 128.38, 127.91, 84.13, 61.41, 58.30, 52.94.

### 2-Chloro-3-methoxy-1,3-diphenylpropan-1-one (3r)<sup>9</sup>

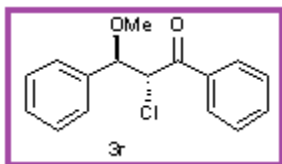

Major diastereomer (anti): 60% yield, white solid, m.p. 61-63 °C.

$^1\text{H}$  NMR (300 MHz,  $\text{CDCl}_3$ ):  $\delta$  (ppm) = 8.09-8.01 (m, 2 H), 7.66-7.57 (m, 1 H), 7.56-7.28 (m, 7H), 5.09 (d,  $J$  = 9.06 Hz, 1 H), 4.76 (d,  $J$  = 9.06 Hz, 1 H), 3.18 (s, 3 H).

$^{13}\text{C}$  NMR (75 MHz,  $\text{CDCl}_3$ ):  $\delta$  (ppm) = 193.37, 137.34, 133.73, 128.84, 128.73, 128.35, 128.09, 83.55, 57.36, 56.81.

### (2-Chloro-1-methoxy-2-nitroethyl)benzene (3s)

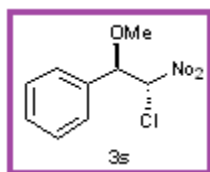

Major diastereomer (anti): 42% yield, colourless liquid.

$^1\text{H}$  NMR (300 MHz,  $\text{CDCl}_3$ ):  $\delta$  (ppm) = 7.58-7.33 (m, 5 H), 5.76 (d,  $J$  = 9.06 Hz, 1 H), 4.70 (d,  $J$  = 9.06 Hz, 1 H), 3.25 (s, 3 H).

$^{13}\text{C}$  NMR (125 MHz,  $\text{CDCl}_3$ ):  $\delta$  (ppm) = 133.47, 129.81, 128.87, 128.17, 91.28, 84.52, 57.65.

HRMS (EI):  $m/z$  calculated for  $\text{C}_9\text{H}_9\text{ClNO}_3$  [ $\text{M} - \text{H}$ ] $^+$  214.02710, found: 214.02700.

### 1-Methoxy-1,2-diphenyl-2-chloroethane (3t)<sup>8</sup>

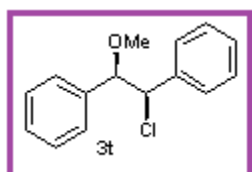

Major diastereomer (anti): 54% yield, white solid, m.p. 69-70 °C.

$^1\text{H}$  NMR (300 MHz,  $\text{CDCl}_3$ ):  $\delta$  (ppm) = 7.24-7.01 (m, 10 H), 4.95 (d,  $J$  = 8.30 Hz, 1 H), 4.46 (d,  $J$  = 7.55 Hz, 1 H), 3.32 (s, 3 H).

$^{13}\text{C}$  NMR (75 MHz,  $\text{CDCl}_3$ ):  $\delta$  (ppm) = 137.51, 128.09, 127.65, 128.03, 87.74, 66.82, 57.28.

### 1-Methoxy-1,2-diphenyl-2-chloroethane (3u)<sup>8</sup>

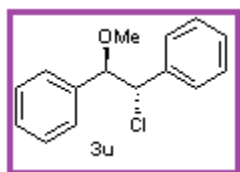

Major diastereomer (anti): 50% yield, white solid, m.p. 83-84 °C.

$^1\text{H}$  NMR (300 MHz,  $\text{CDCl}_3$ ):  $\delta$  (ppm) = 7.38-7.28 (m, 8 H), 7.24-7.18 (m, 2 H), 4.98 (d,  $J$  = 6.61 Hz, 1 H), 4.53 (d,  $J$  = 6.61 Hz, 1 H), 3.19 (s, 3 H).

### 2-Chloro-1-methoxy-2,3-dihydro-1H-indene (3v)<sup>8</sup>

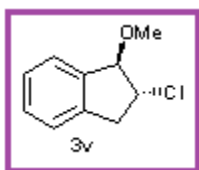

Major diastereomer (anti): 63% yield, yellow liquid.



$^1\text{H}$  NMR (500 MHz,  $\text{CDCl}_3$ ):  $\delta$  (ppm) = 7.39 (d,  $J$  = 7.17 Hz, 1 H), 7.36-7.31 (m, 2 H), 7.23 (d,  $J$  = 7.17 Hz, 1 H), 4.85 (d,  $J$  = 3.81 Hz, 1 H), 4.49-4.44 (m, 1 H), 3.64-3.54 (m, 4 H), 3.10 (dd,  $J$  = 16.47, 5.01 Hz, 1 H).

### 2-Chloro-1-methoxy-1,2,3,4-tetrahydronaphthalene (3w)

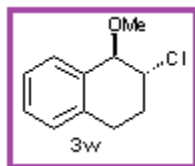

Major diastereomer (anti): 64% yield, colourless liquid.

$^1\text{H}$  NMR (300 MHz,  $\text{CDCl}_3$ ):  $\delta$  (ppm) = 7.36-7.29 (m, 1 H), 7.28-7.17 (m, 2 H), 7.16-7.10 (m, 1 H), 4.53-4.46 (m, 1 H), 4.35 (d,  $J$  = 4.53 Hz, 1 H), 3.53 (s, 3 H), 3.11-2.95 (m, 1 H), 2.88-2.74 (m, 1 H), 2.50-2.36 (m, 1 H), 2.18-2.03 (m, 1 H).

$^{13}\text{C}$  NMR (125 MHz,  $\text{CDCl}_3$ ):  $\delta$  (ppm) = 135.66, 133.01, 130.03, 128.69, 128.13, 126.07, 81.32, 57.53, 56.99, 26.84, 24.93.

HRMS (EI):  $m/z$  calculated for  $\text{C}_{11}\text{H}_{13}\text{ClO}$   $[\text{M}]^+$  196.06549, found: 196.06539.

### 1-Chloro-2-methoxycyclohexane (3x)<sup>8</sup>

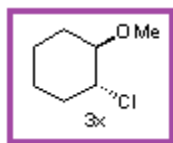

Major diastereomer (anti): 62.5% yield, colourless liquid.

$^1\text{H}$  NMR (300 MHz,  $\text{CDCl}_3$ ):  $\delta$  (ppm) = 3.90-3.77 (m, 1 H), 3.45 (s, 3 H), 3.24-3.10 (m, 1 H), 2.28-2.07 (m, 2 H), 1.83-1.58 (m, 3 H), 1.42-1.21 (m, 3 H).

### 2-Chloro-1,4-naphthoquinone (3y)<sup>10</sup>

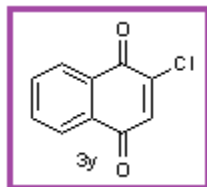

57% yield, yellow solid, m.p. 108-110 °C.

$^1\text{H}$  NMR (300 MHz,  $\text{CDCl}_3$ ):  $\delta$  (ppm) = 8.23-8.15 (m, 1 H), 8.14-8.07 (m, 1 H), 7.85-7.75 (m, 2 H), 7.24 (s, 1 H).

$^{13}\text{C}$  NMR (75 MHz,  $\text{CDCl}_3$ ):  $\delta$  (ppm) = 182.61, 177.89, 146.27, 135.86, 134.46, 134.11, 131.69, 131.23, 127.47, 126.71.

# Copies of $^1\text{H}$ and $^{13}\text{C}$ NMR Spectra

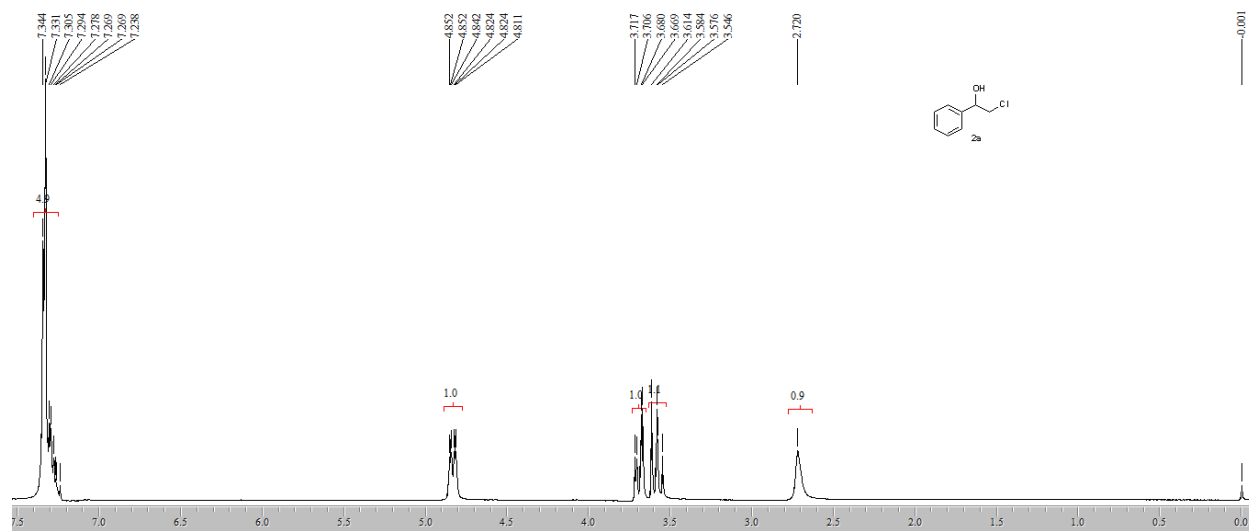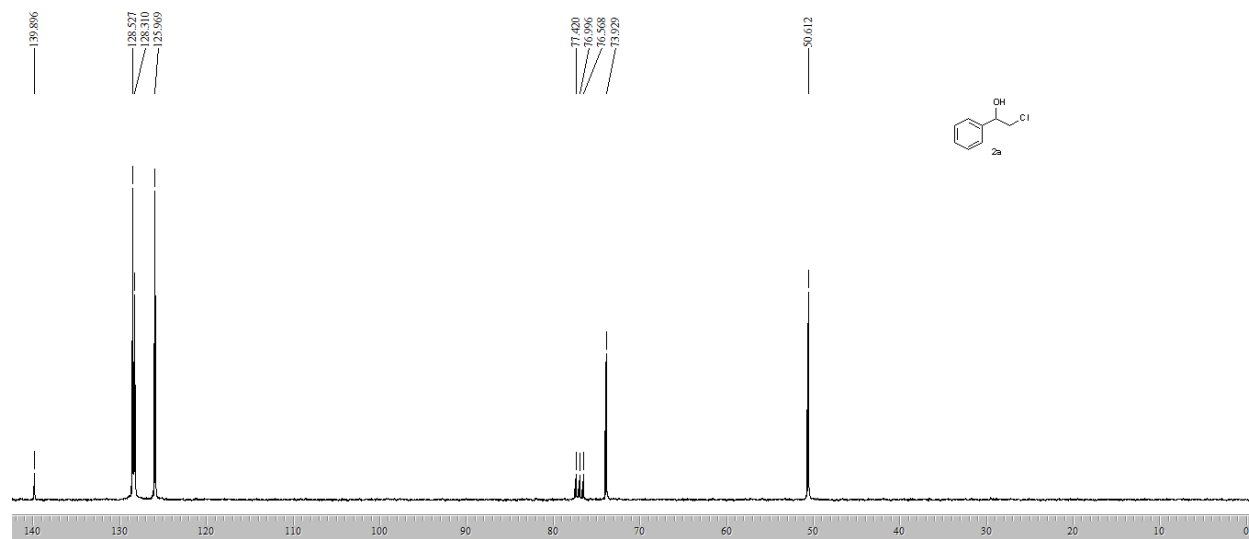

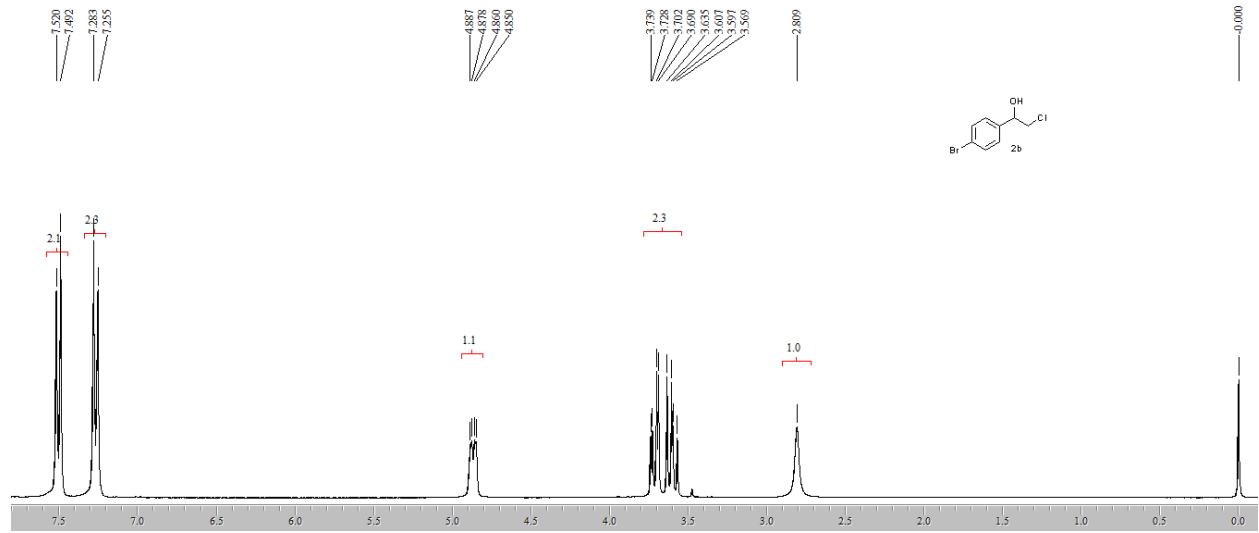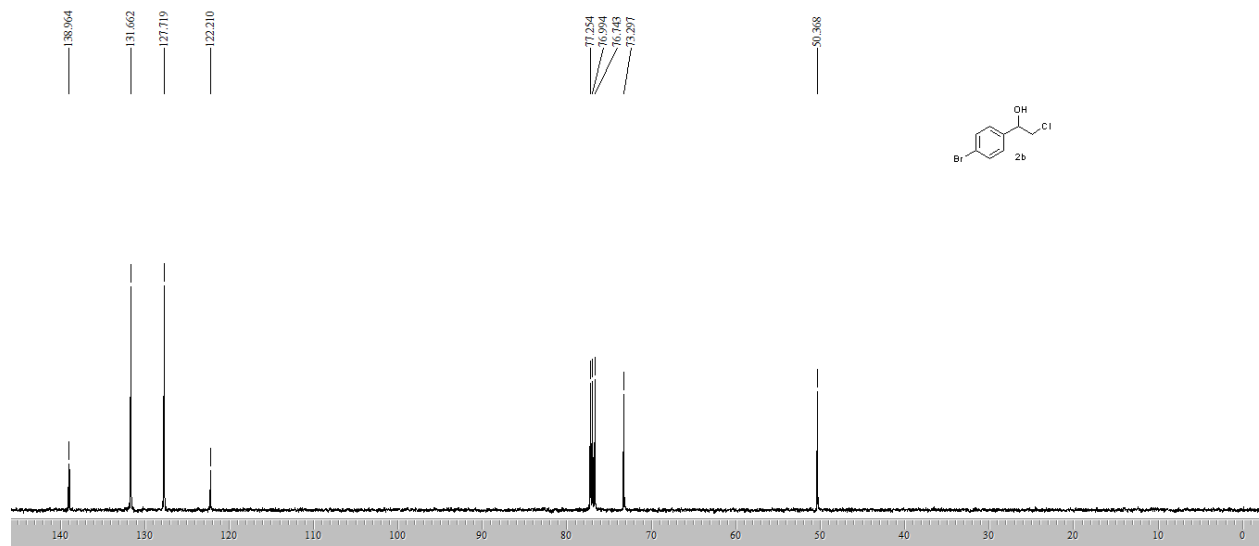

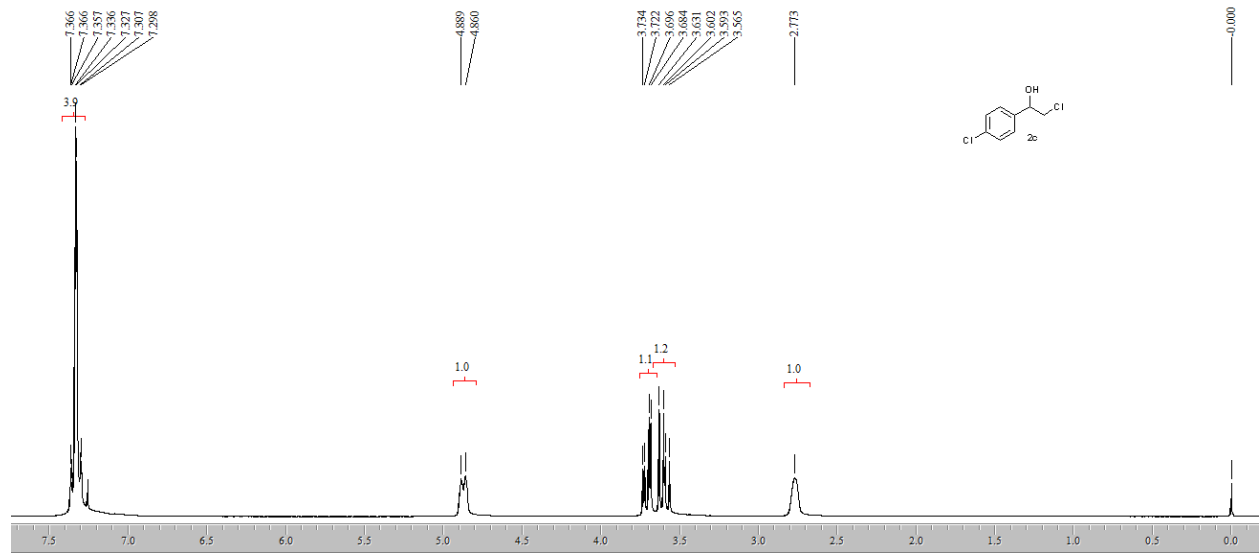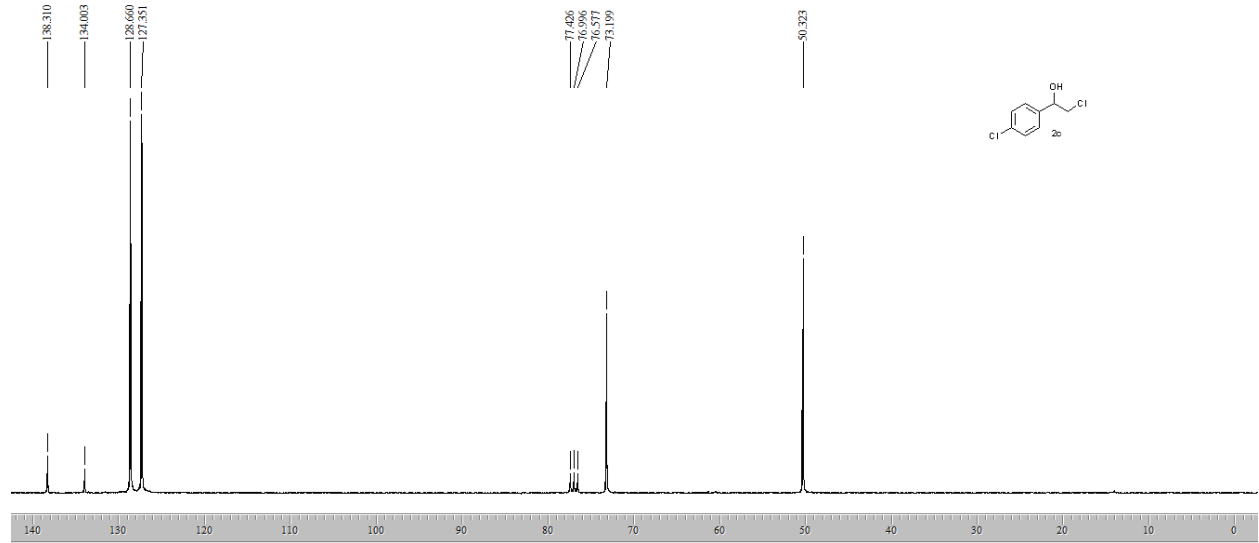

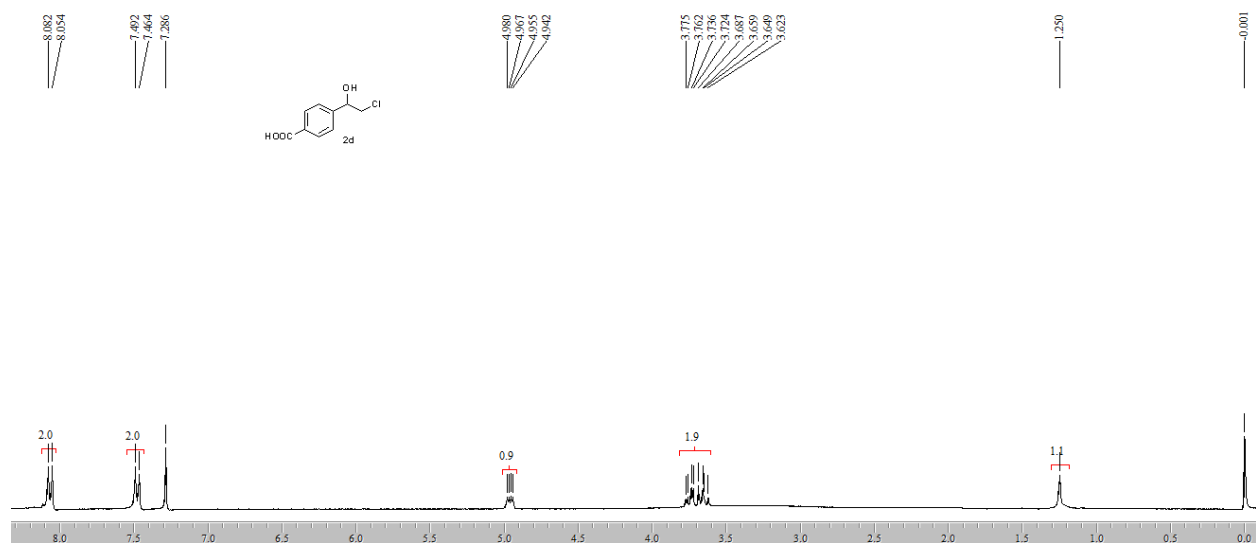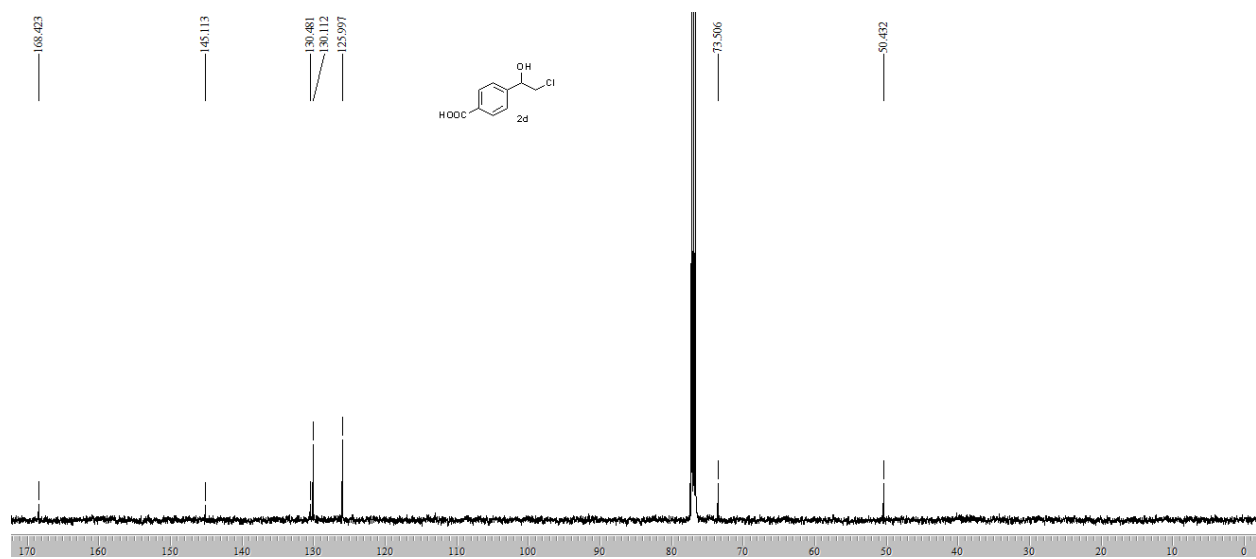

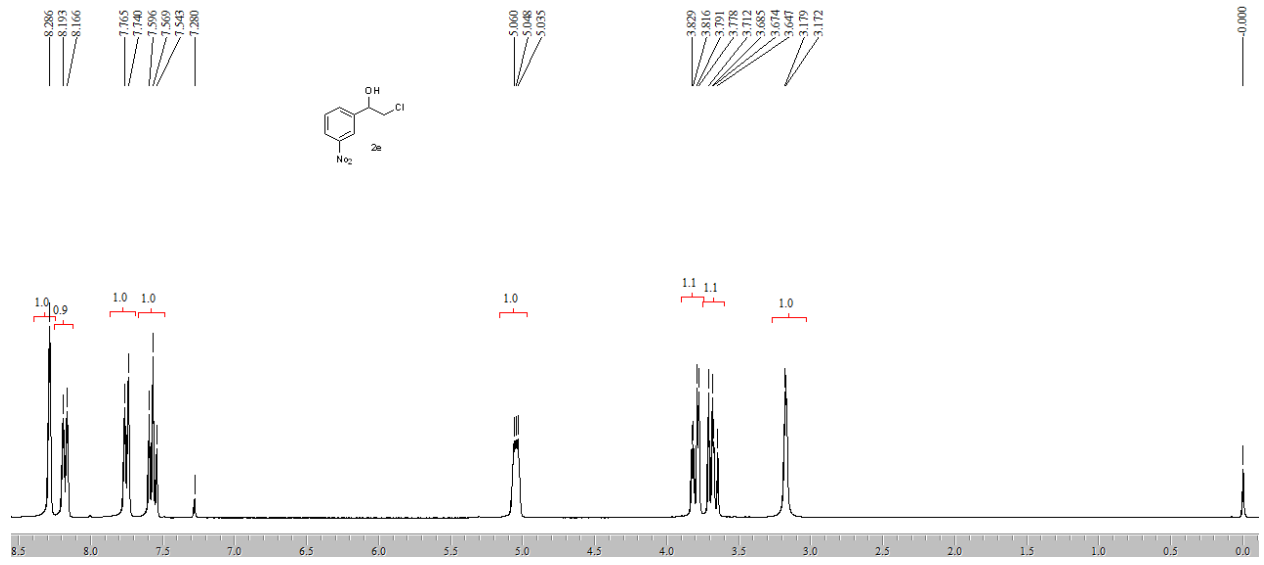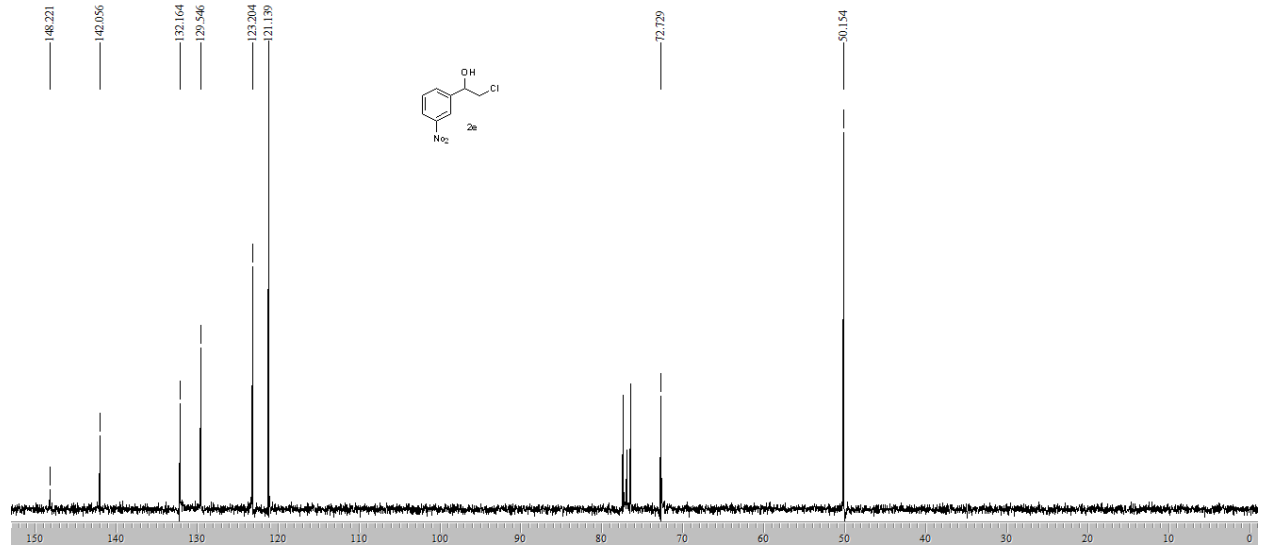

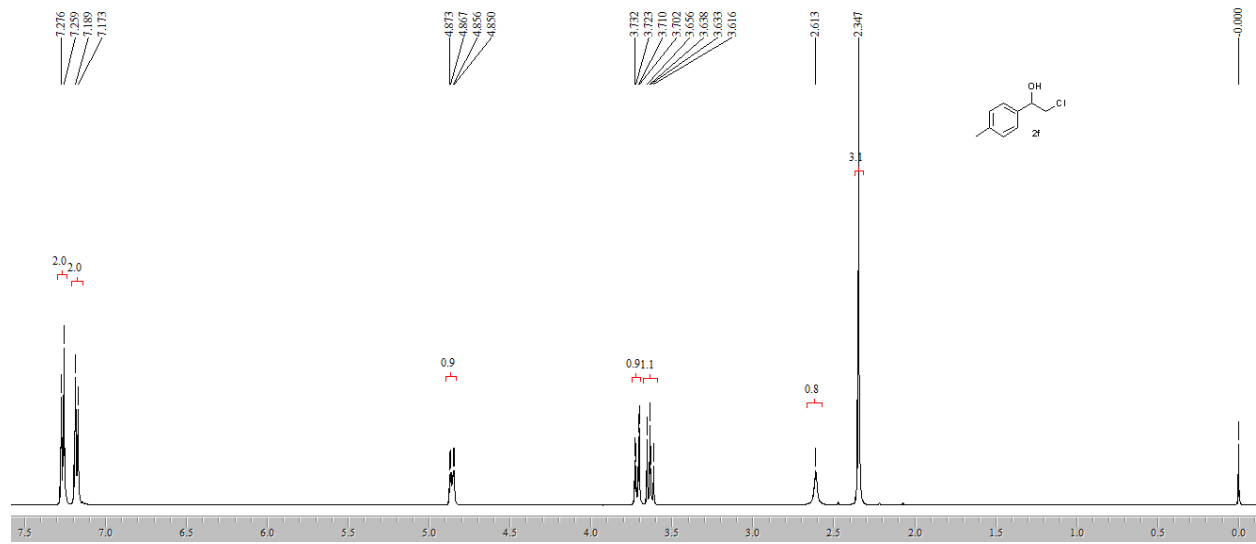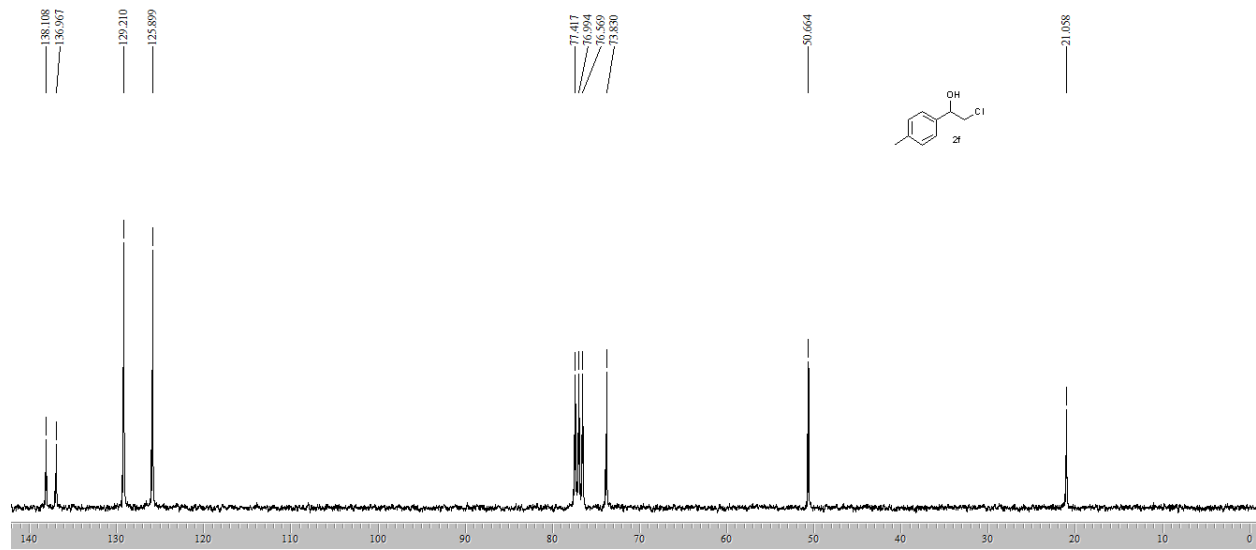

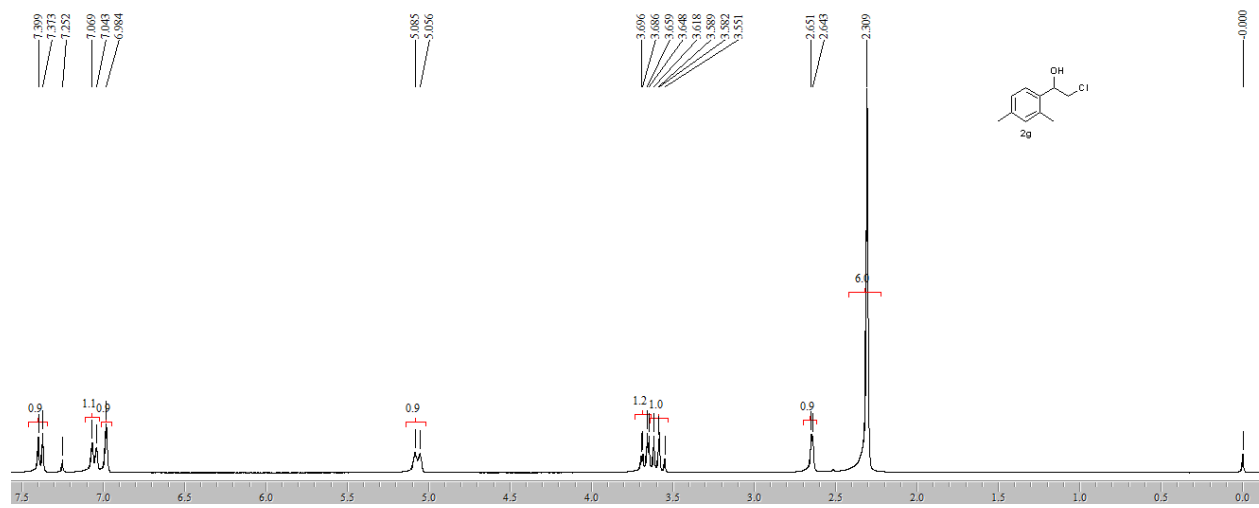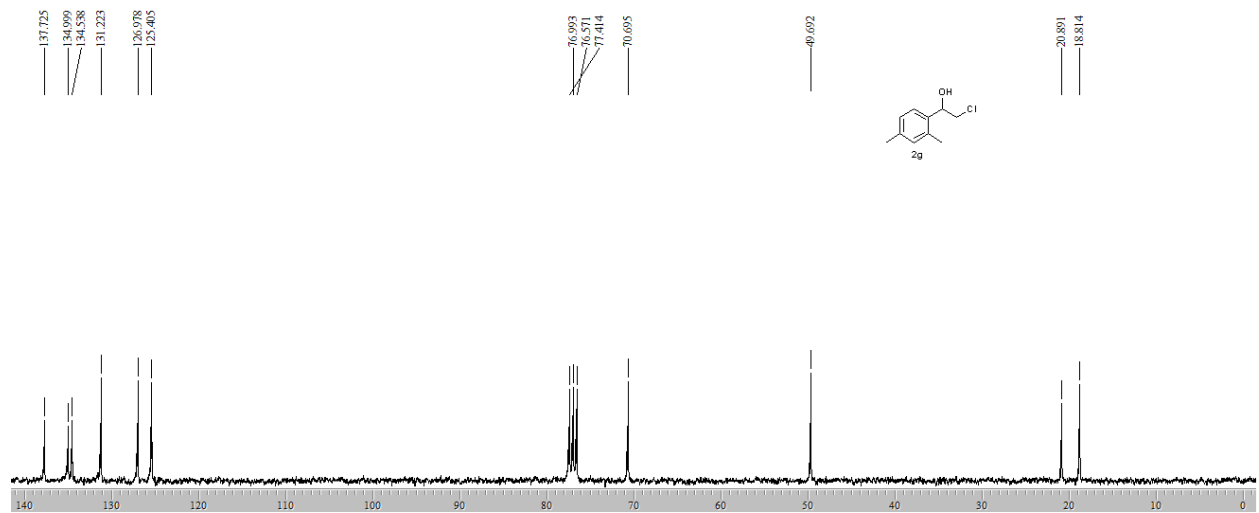



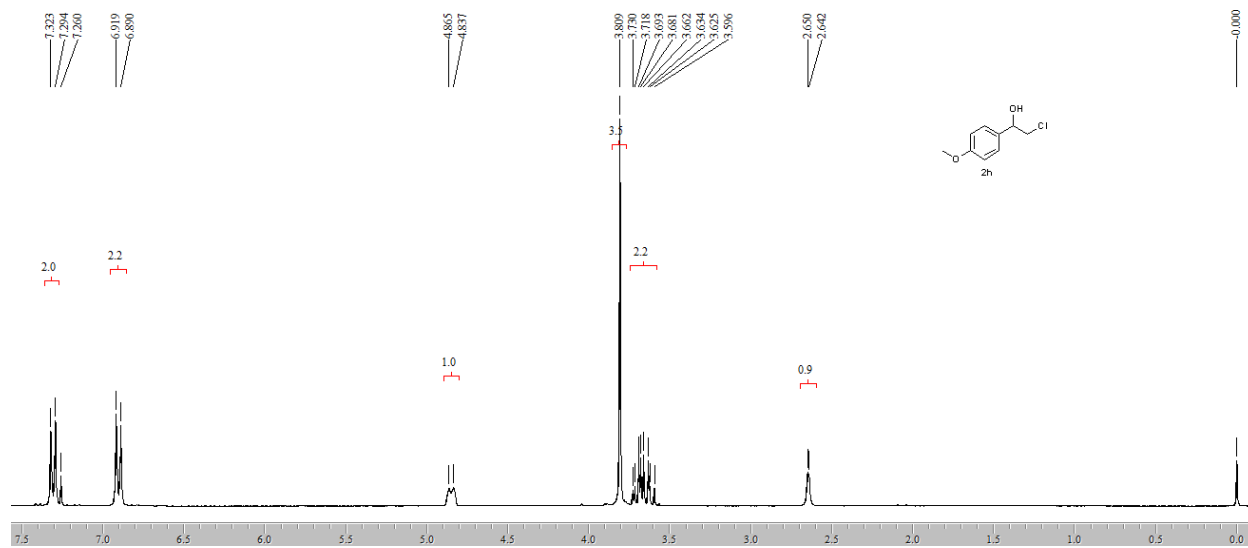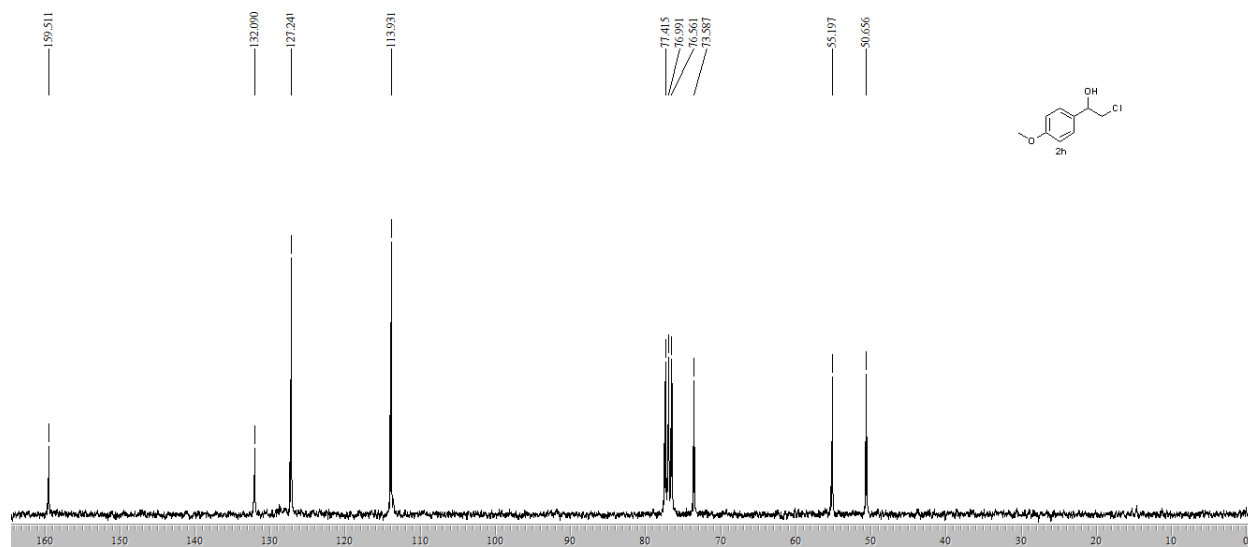

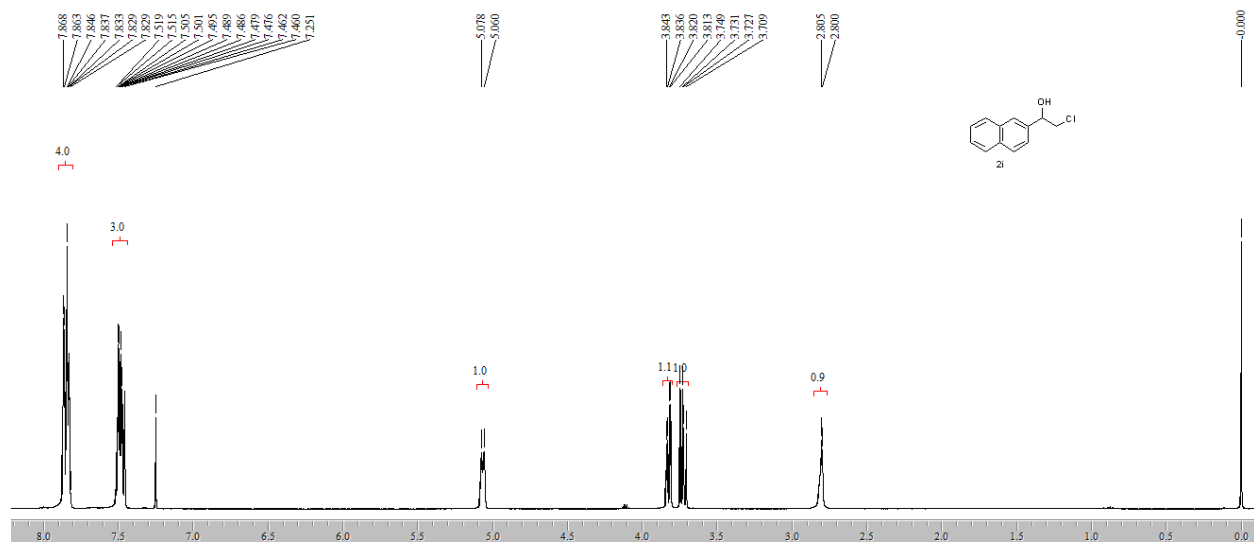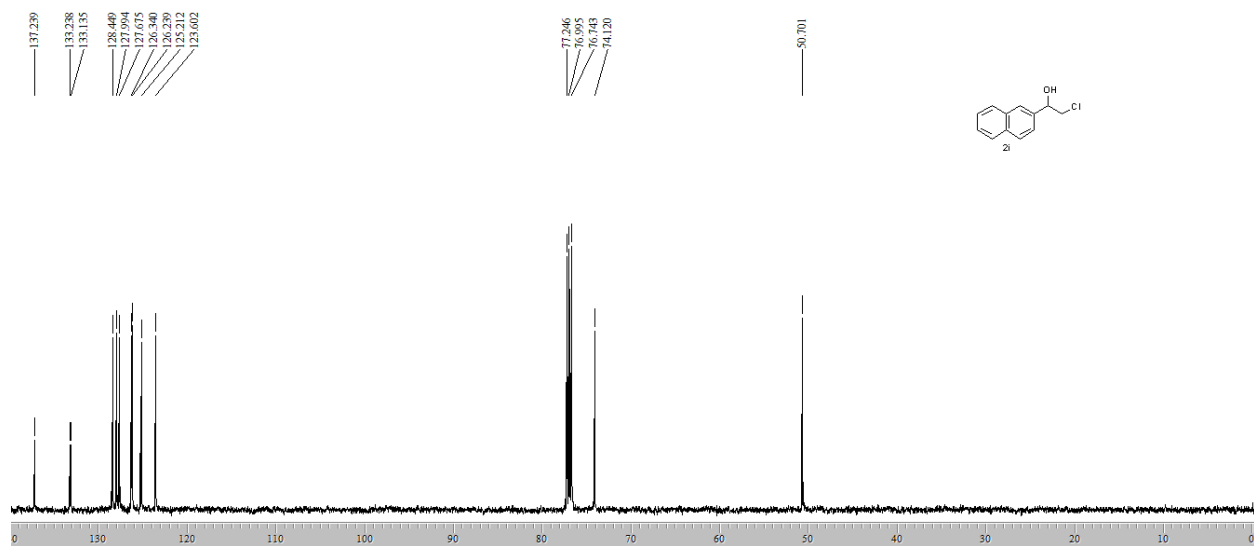

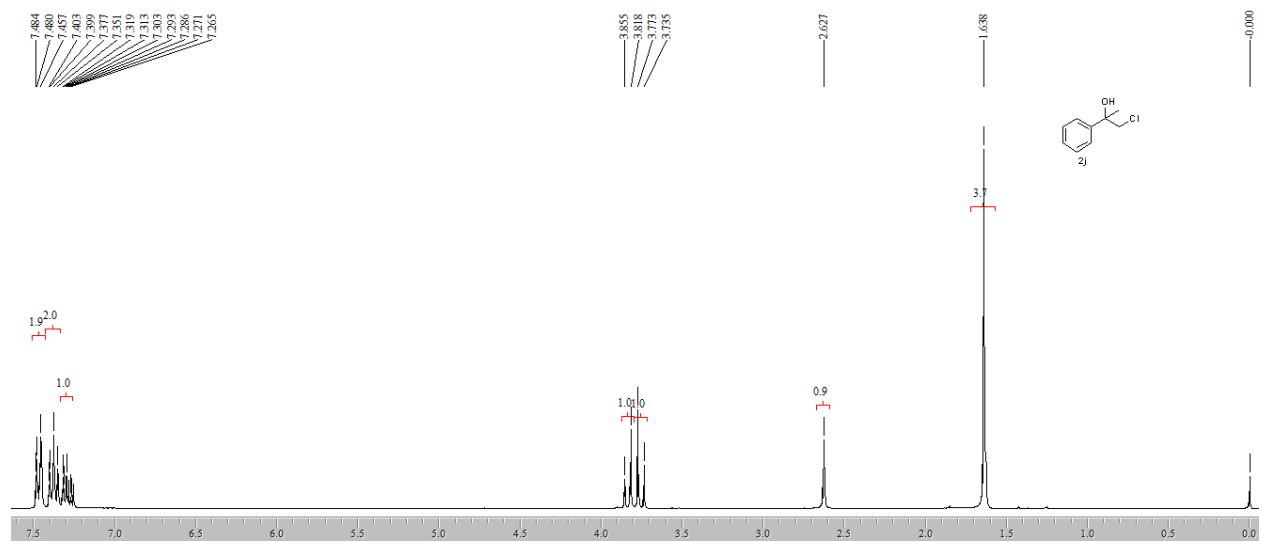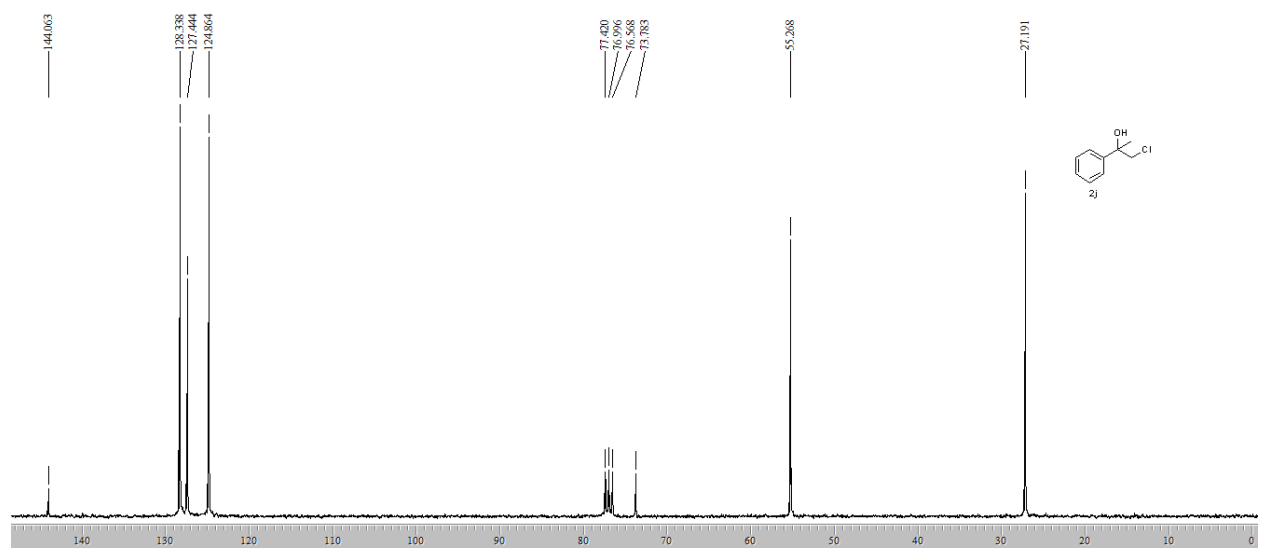

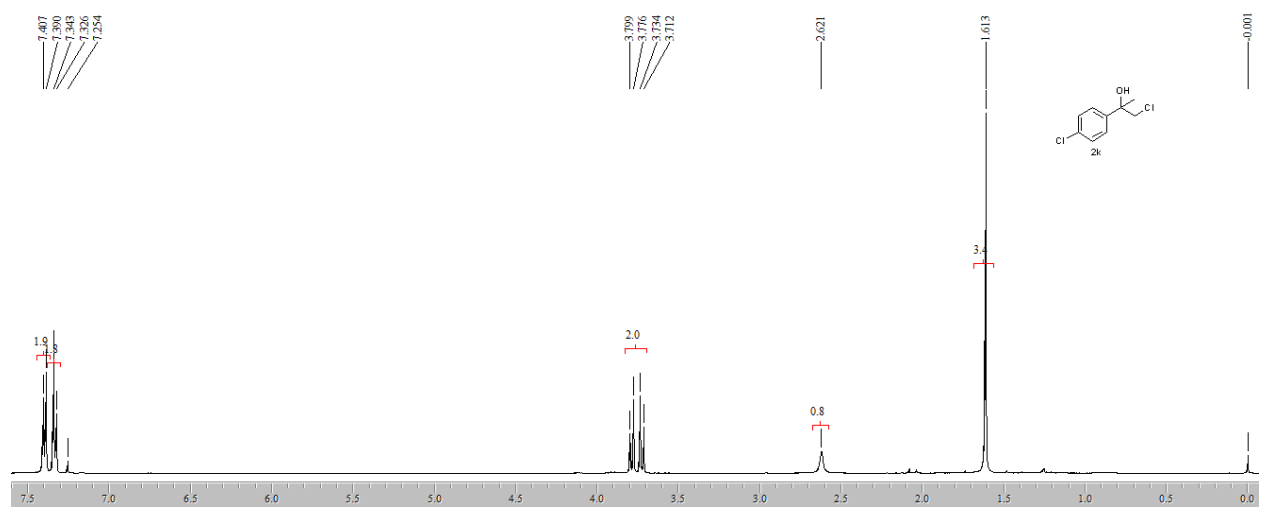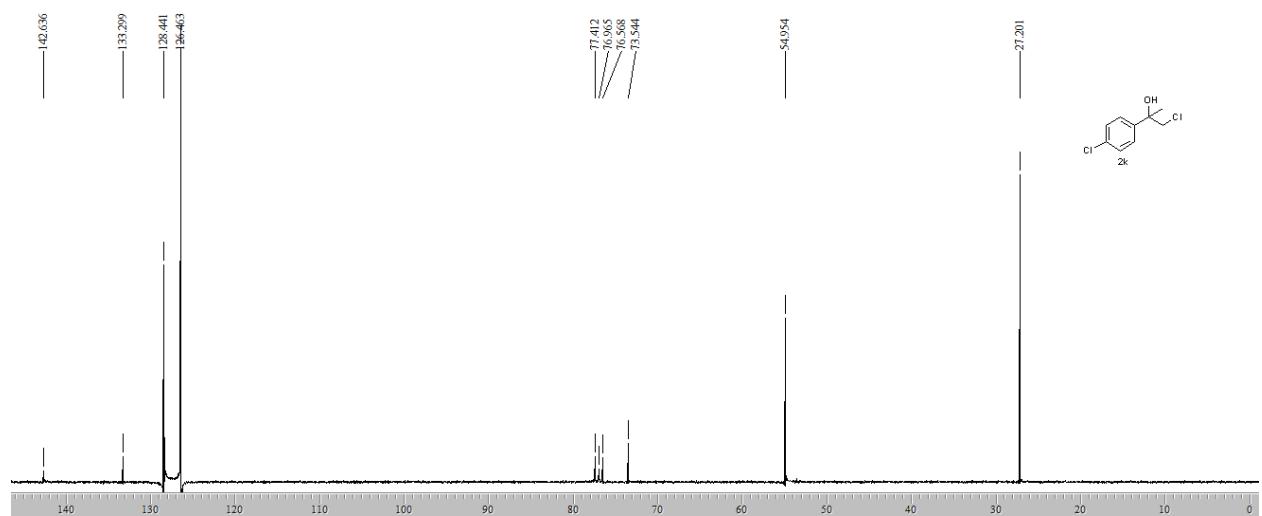

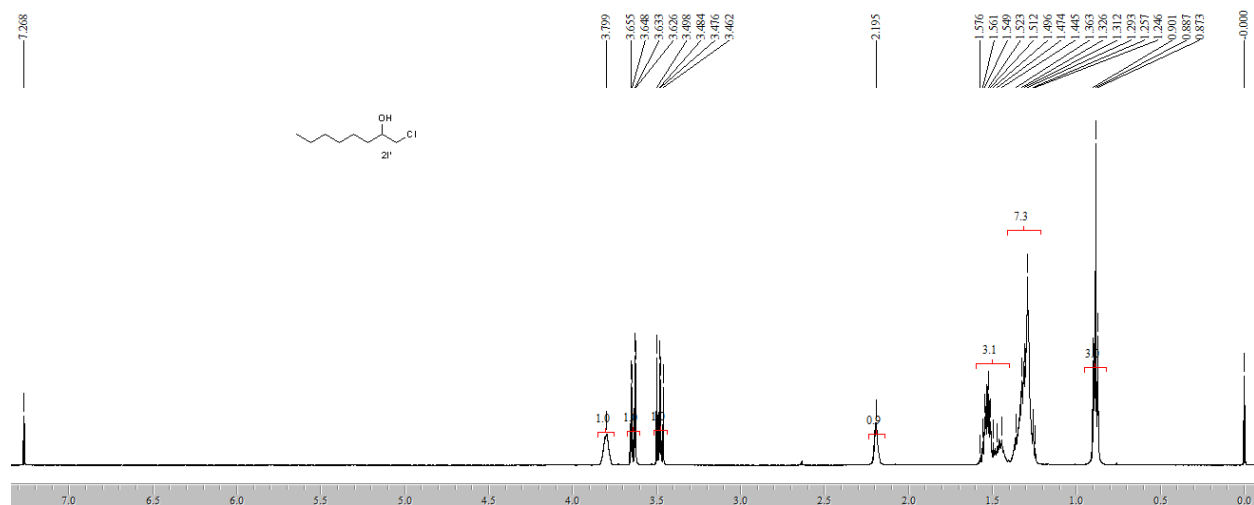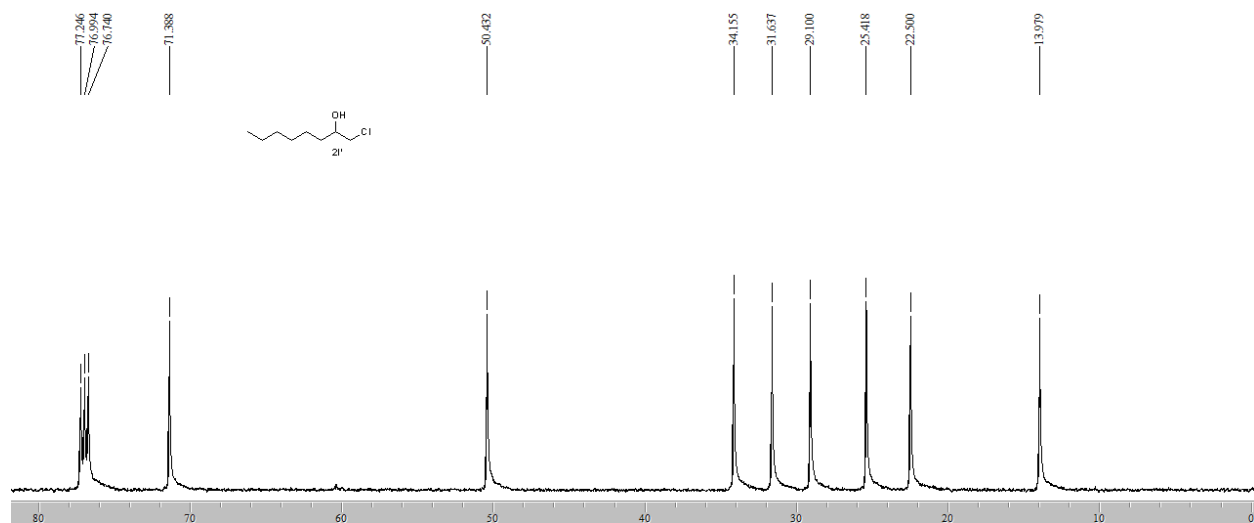

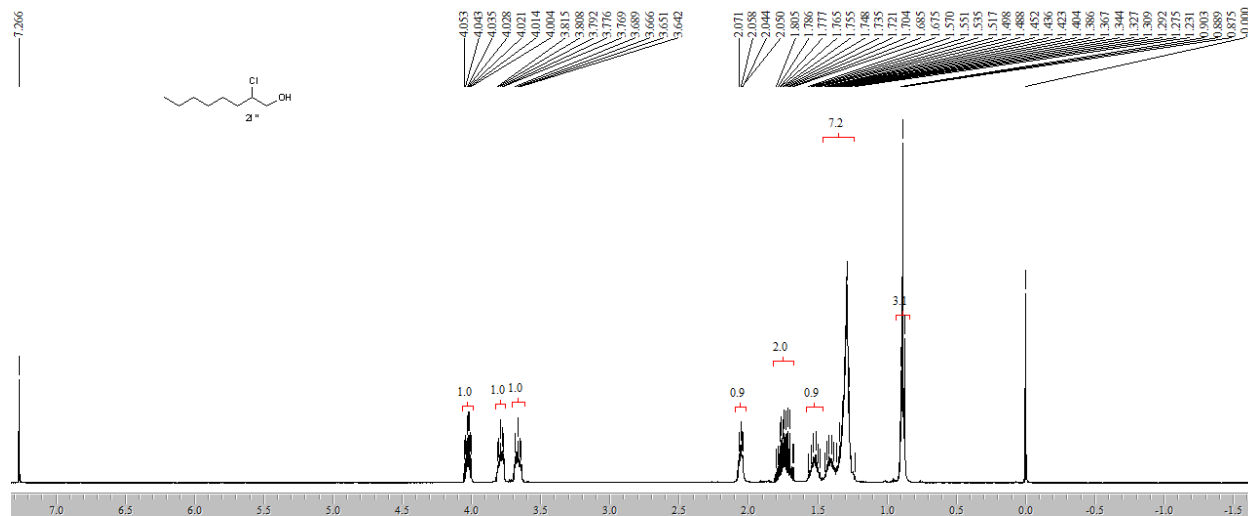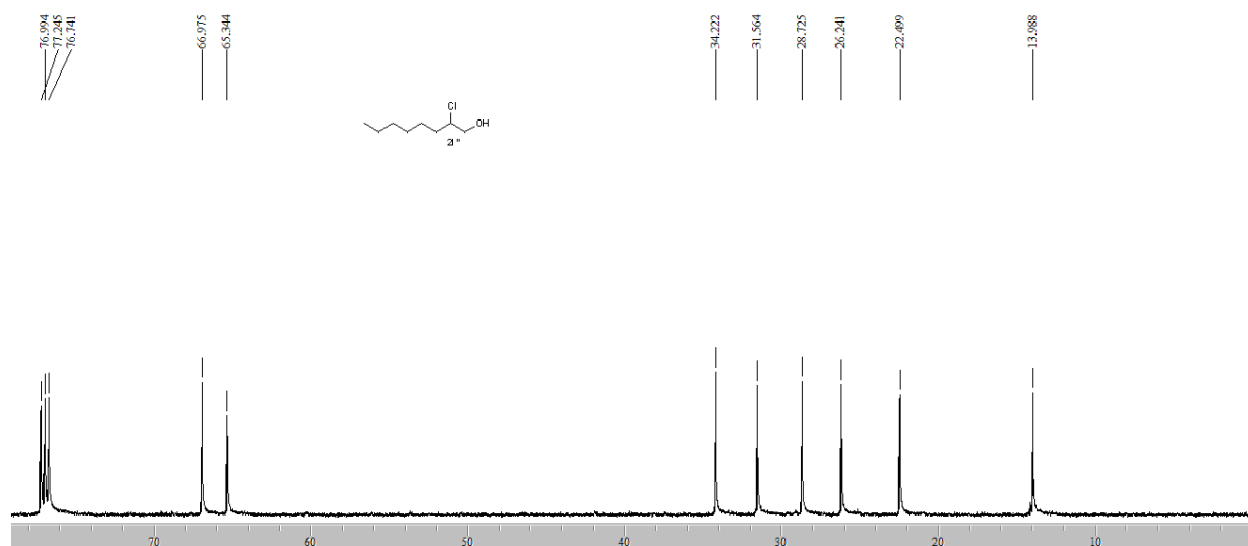

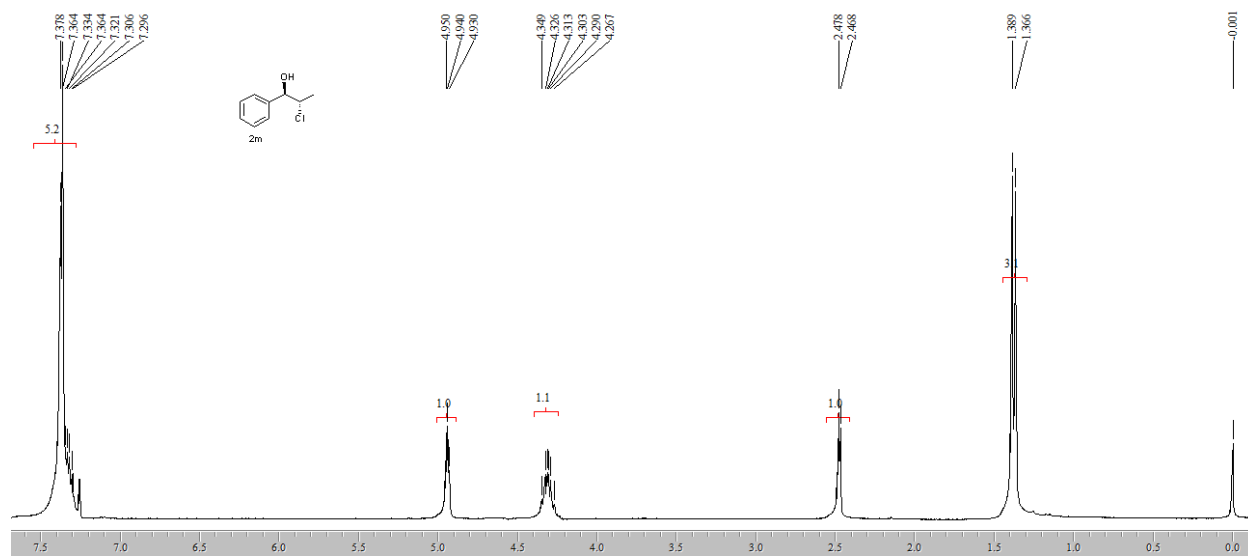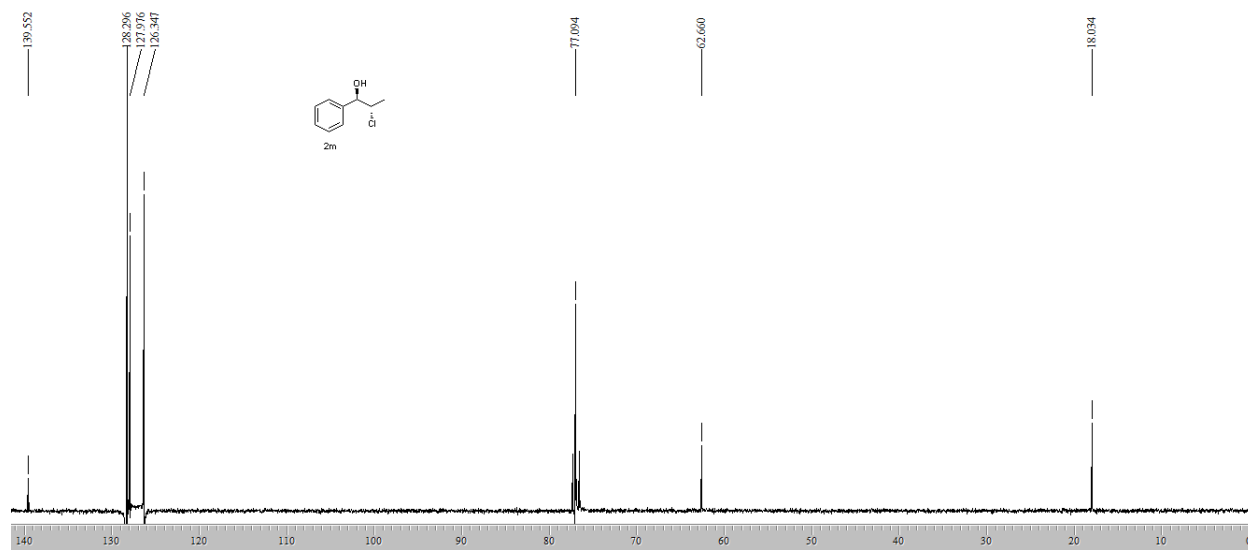

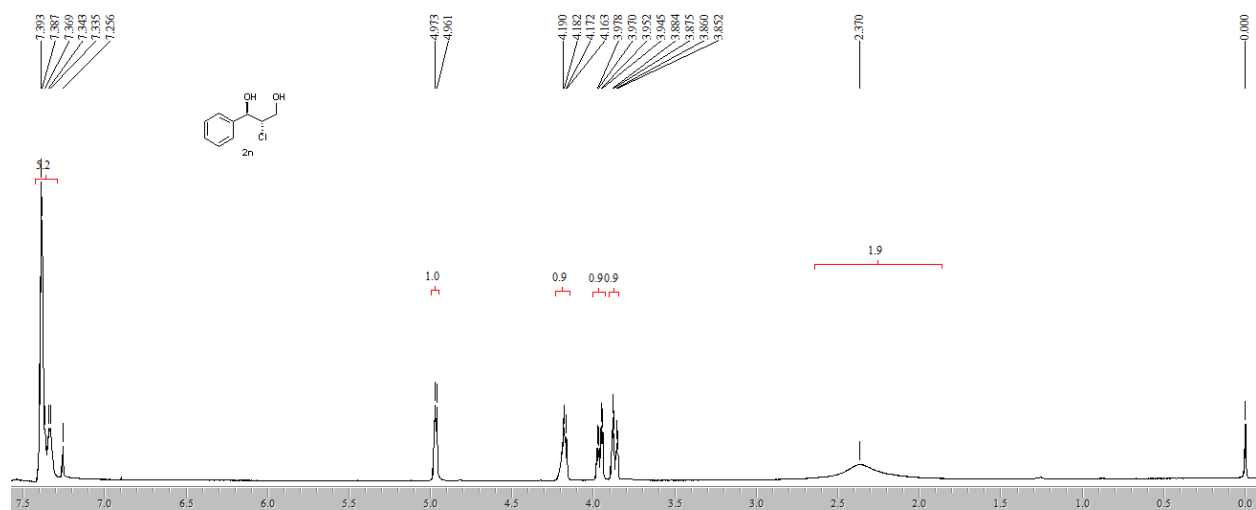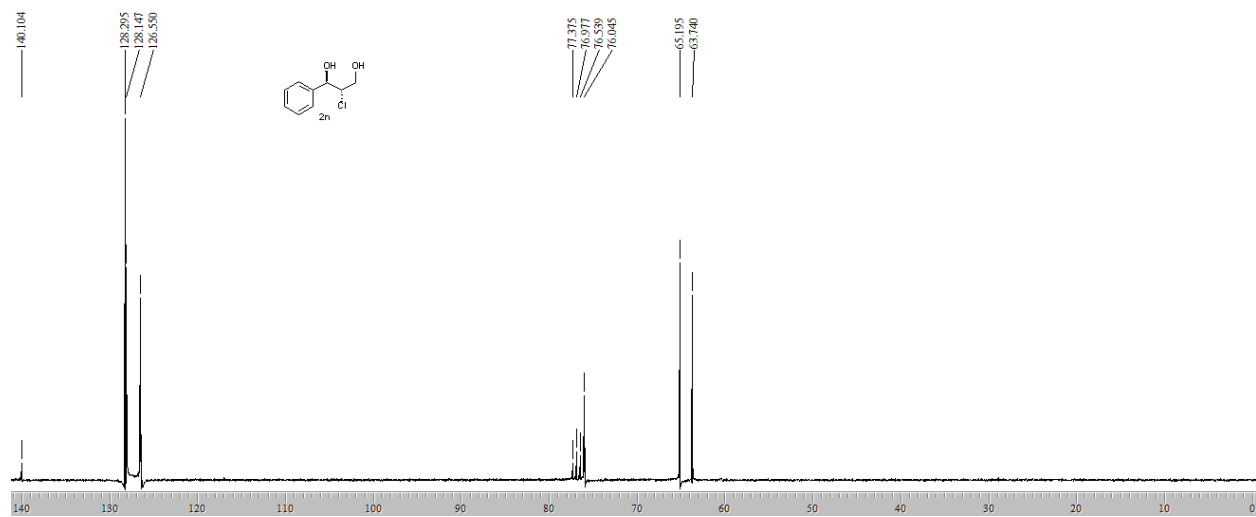



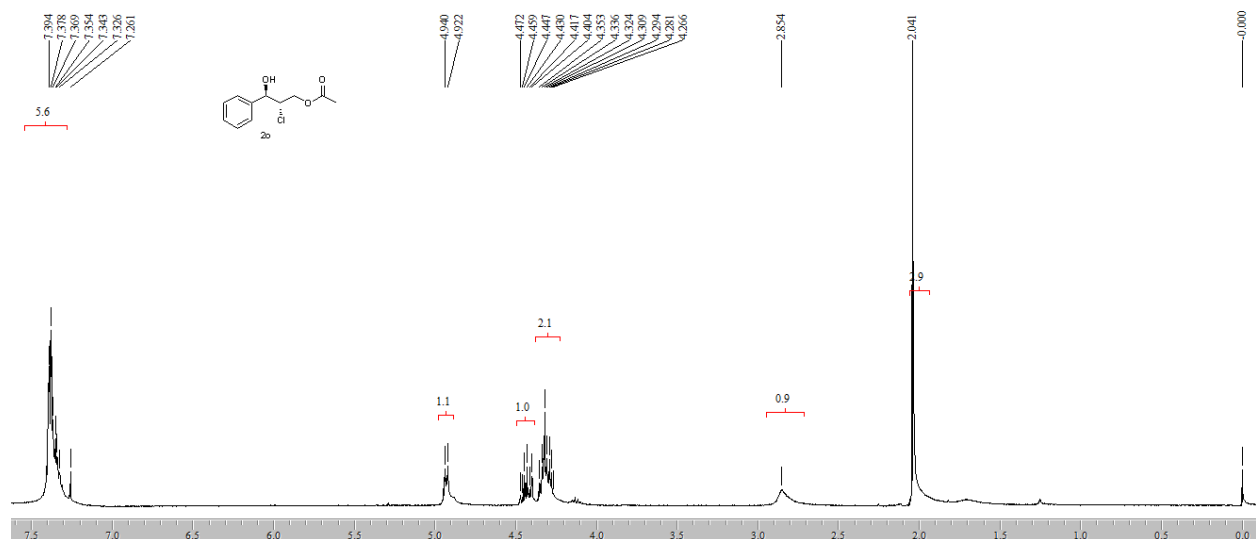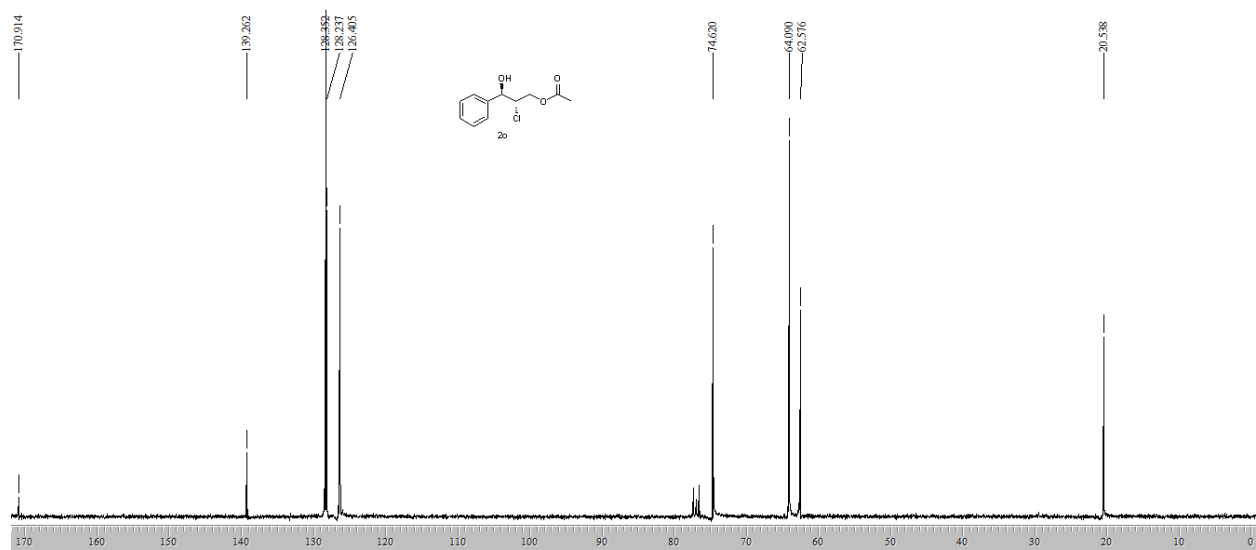

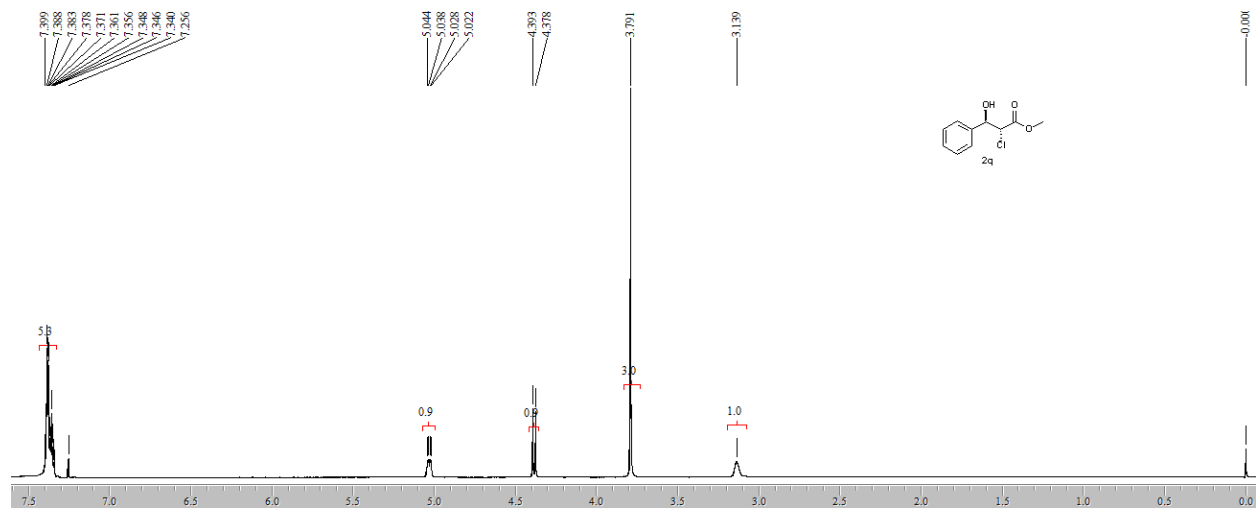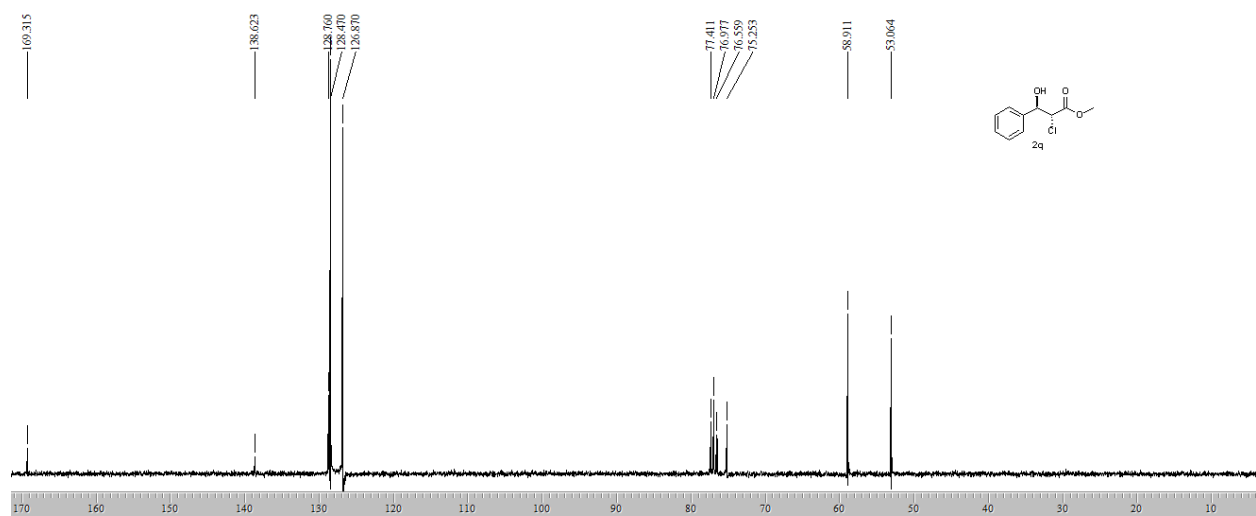

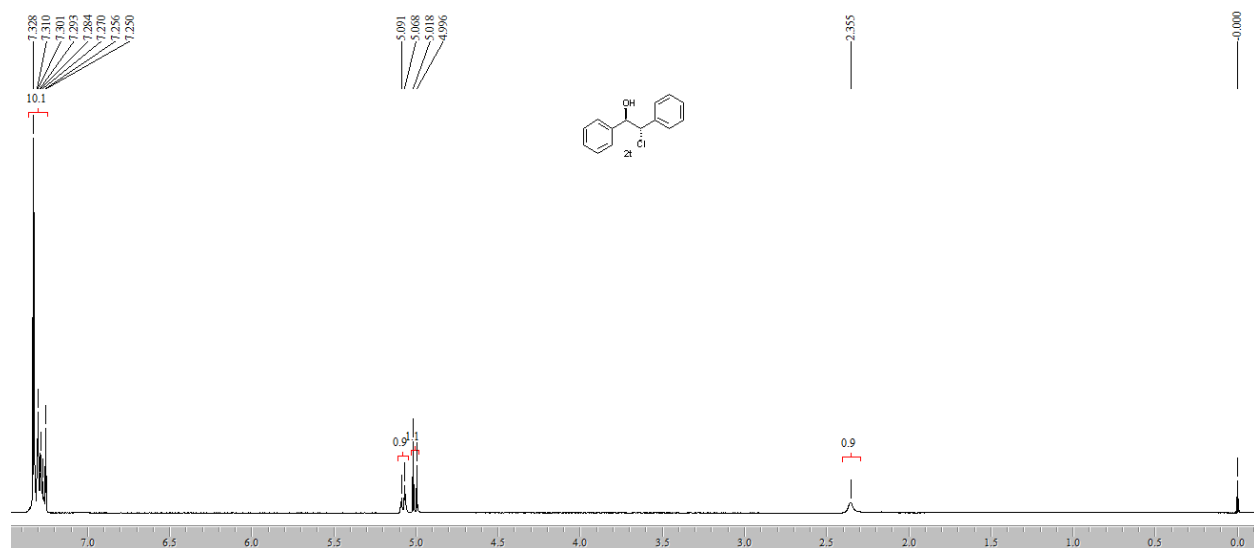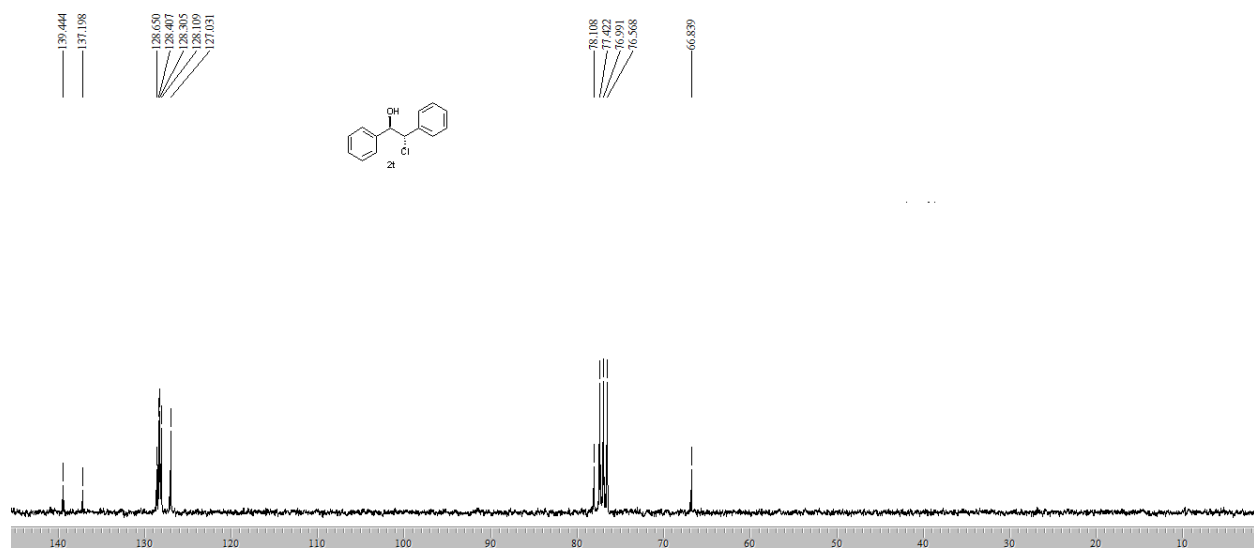

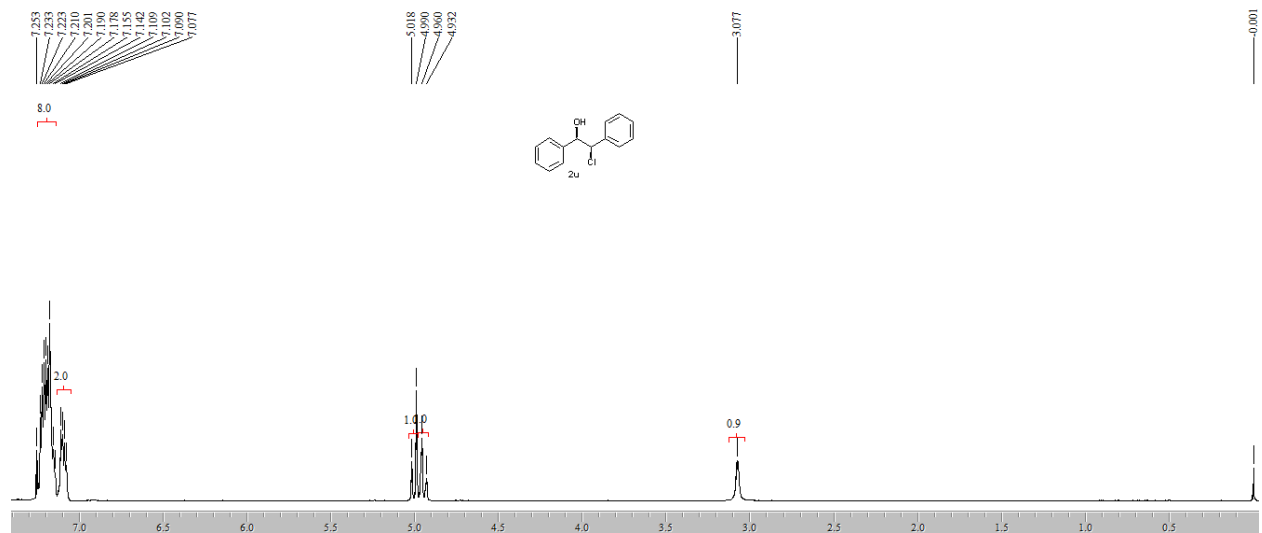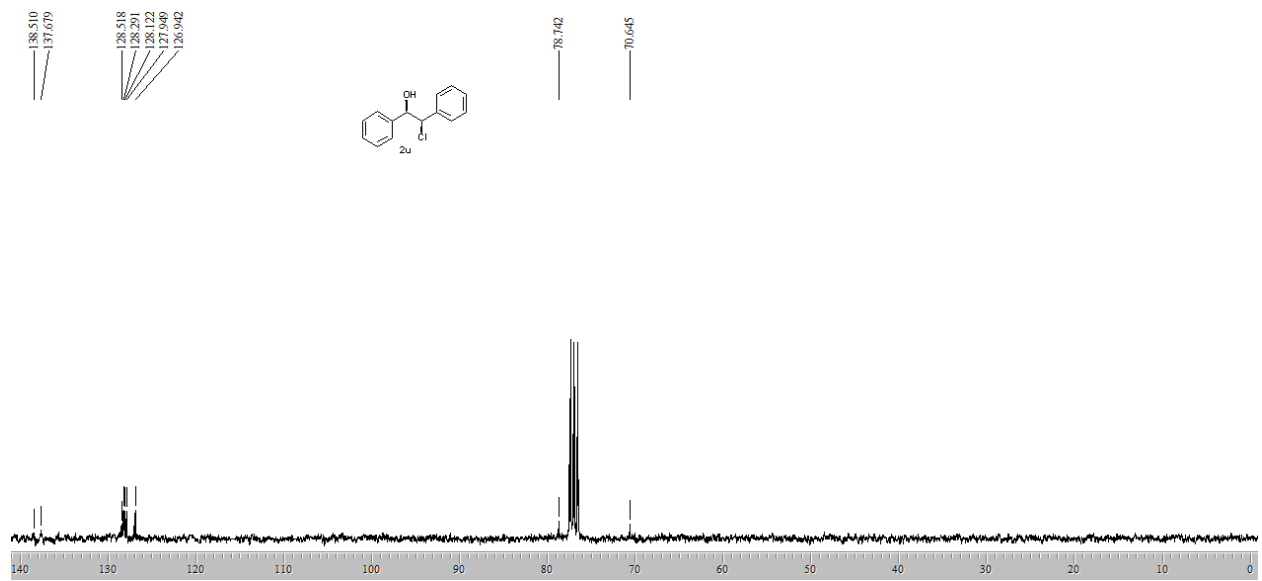

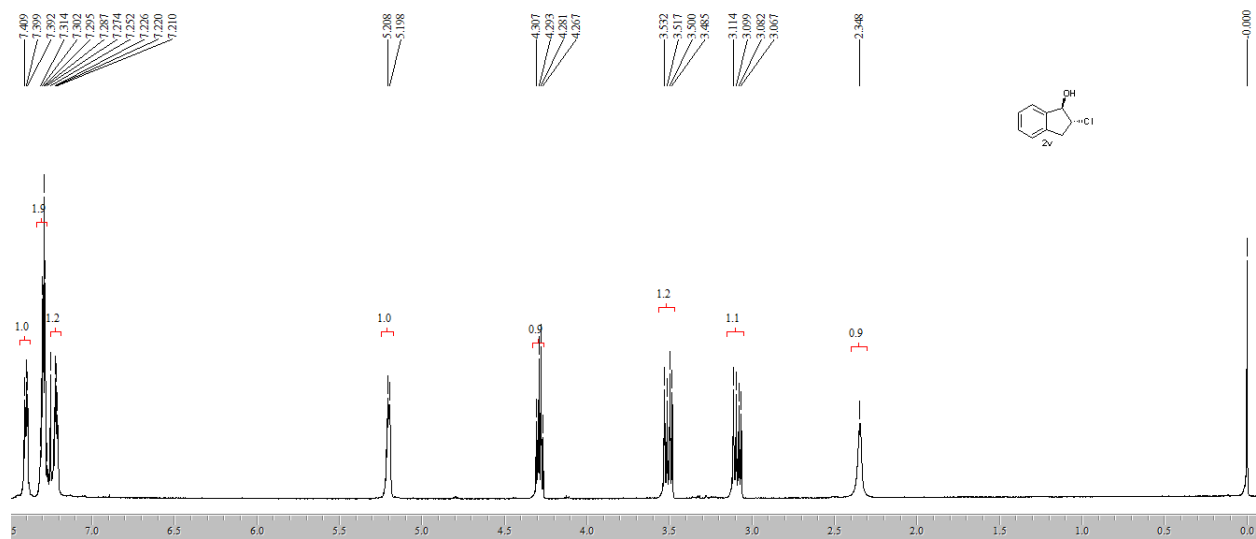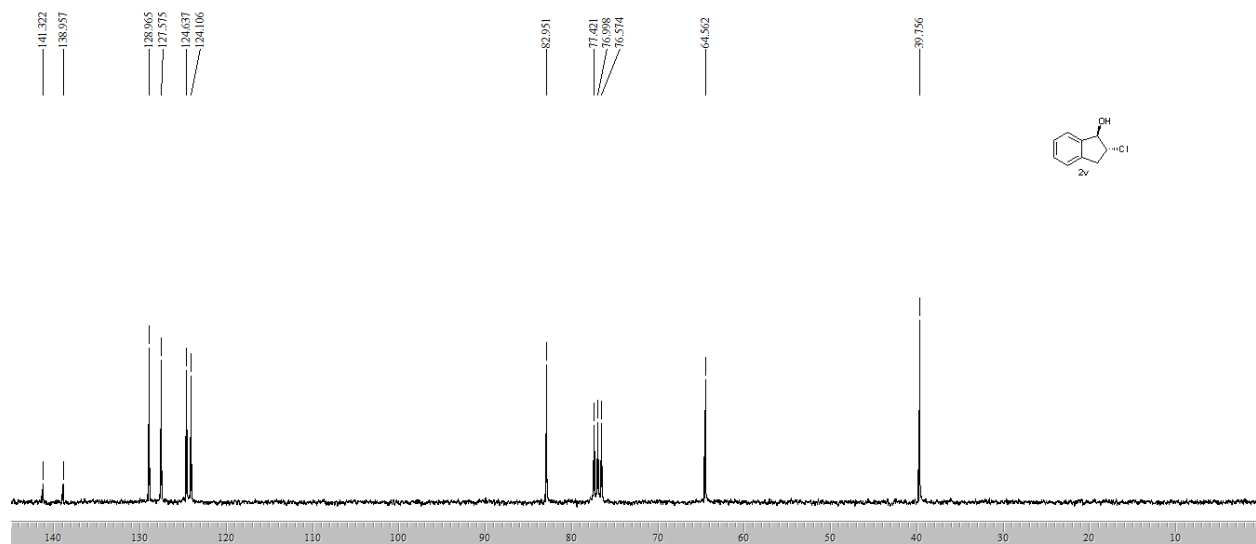

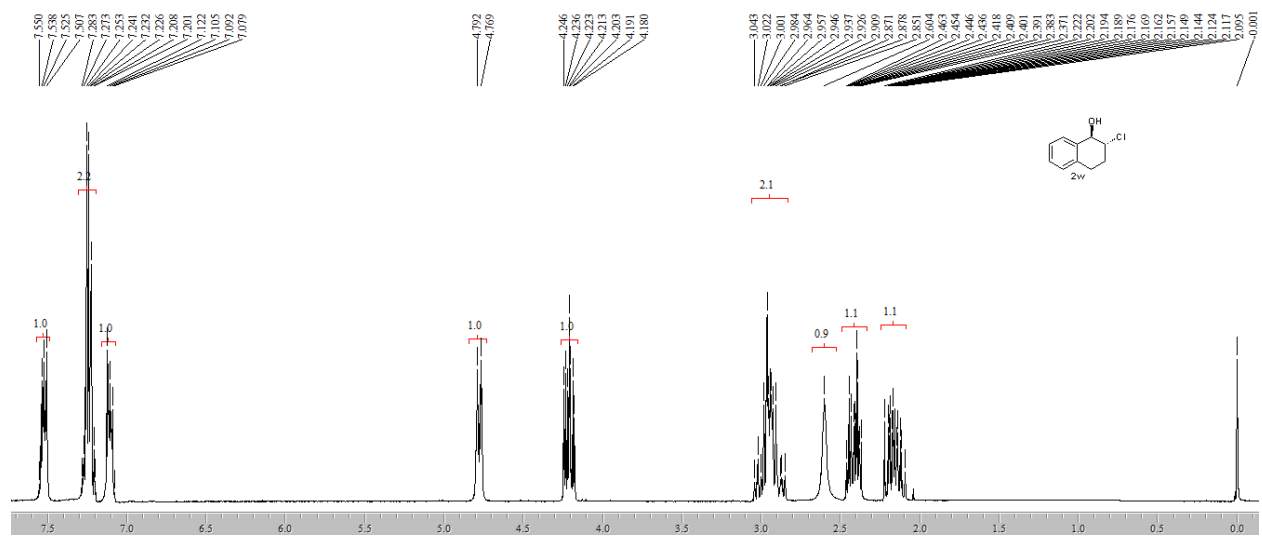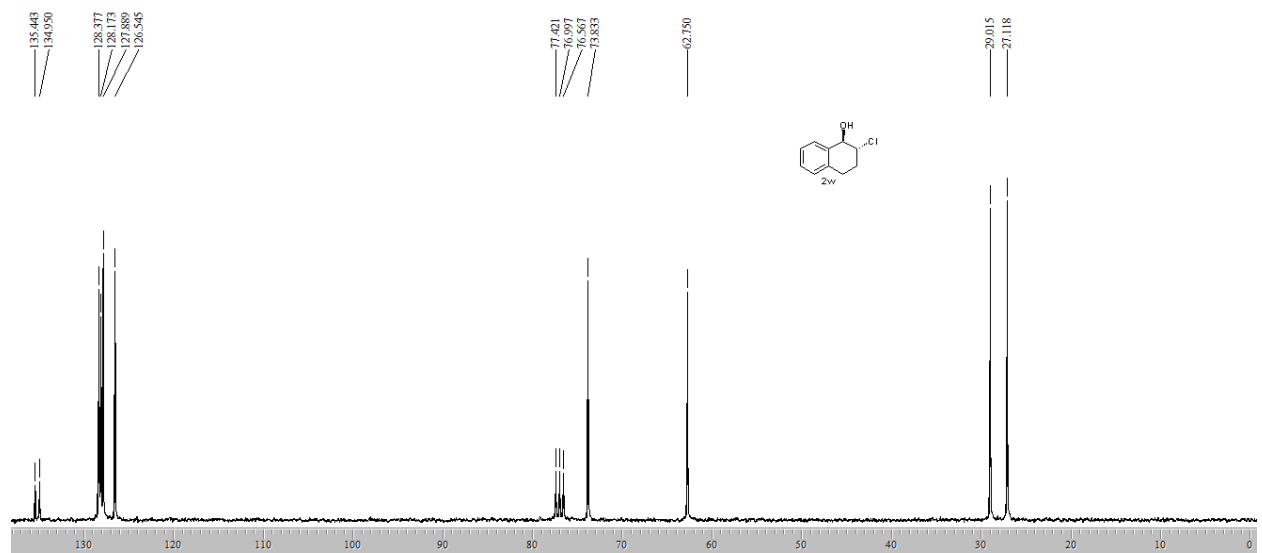

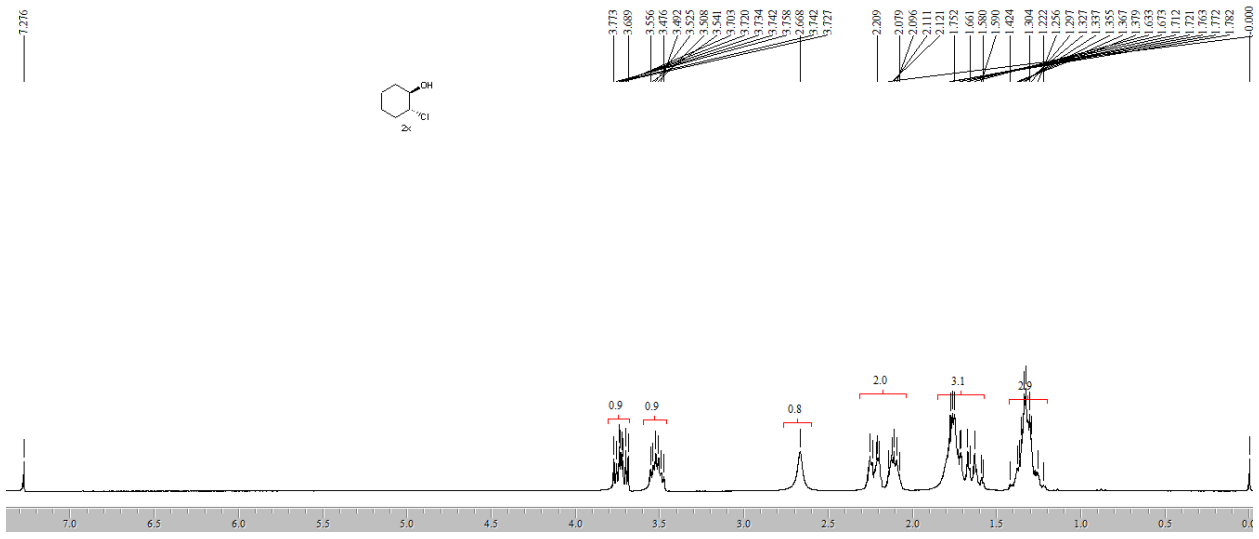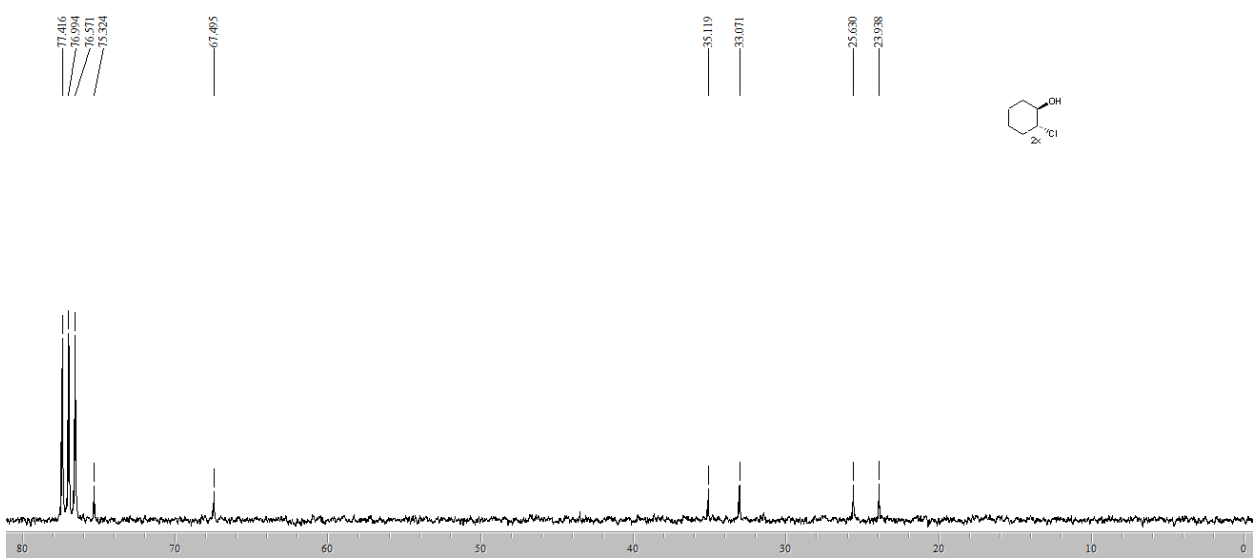

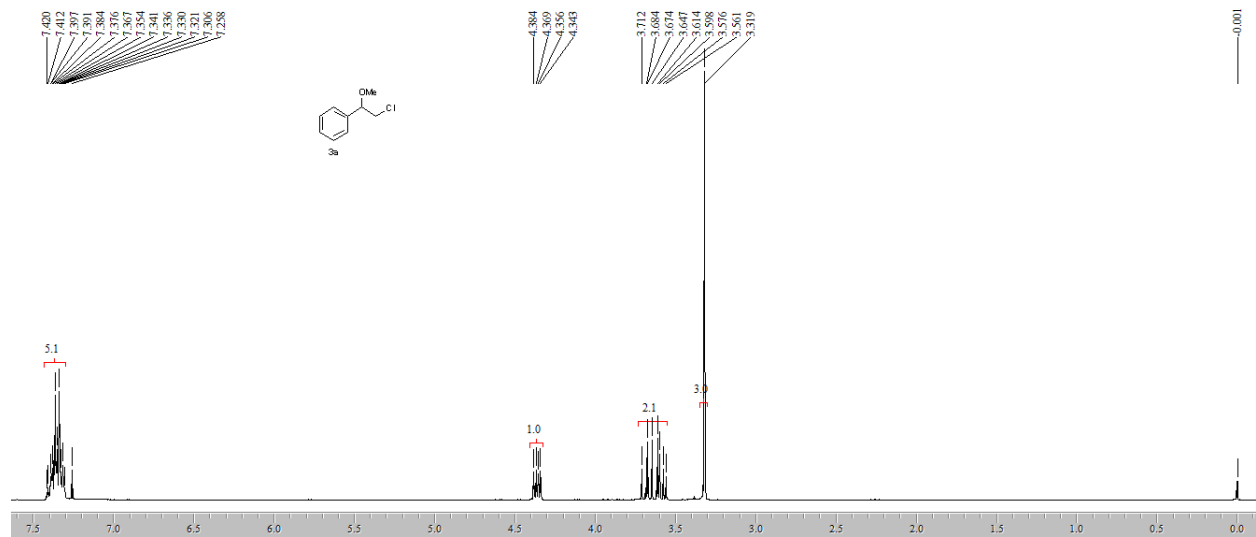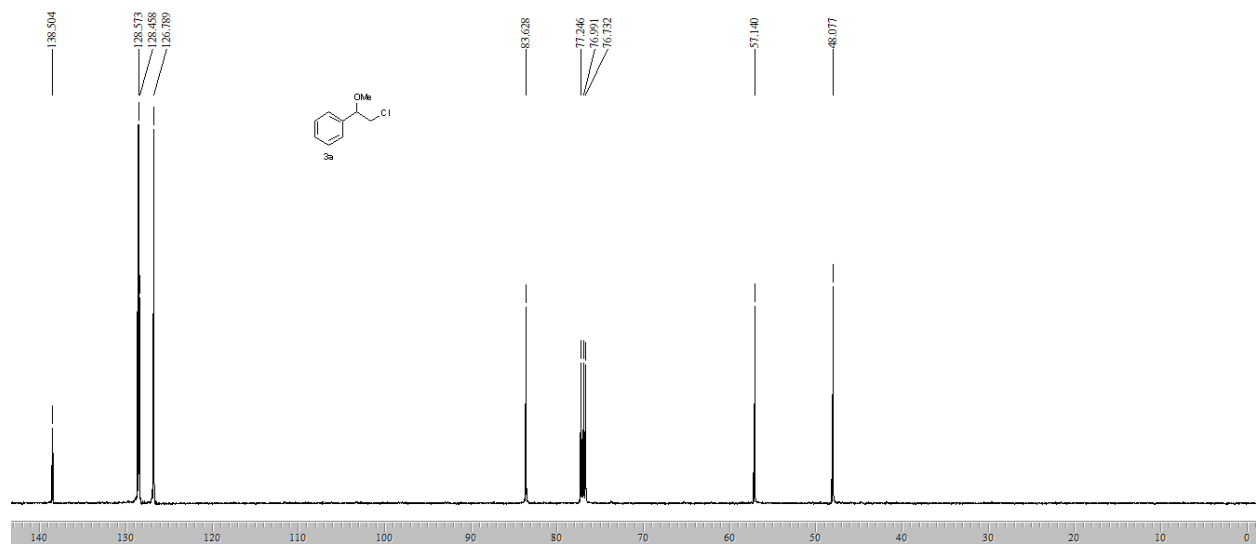



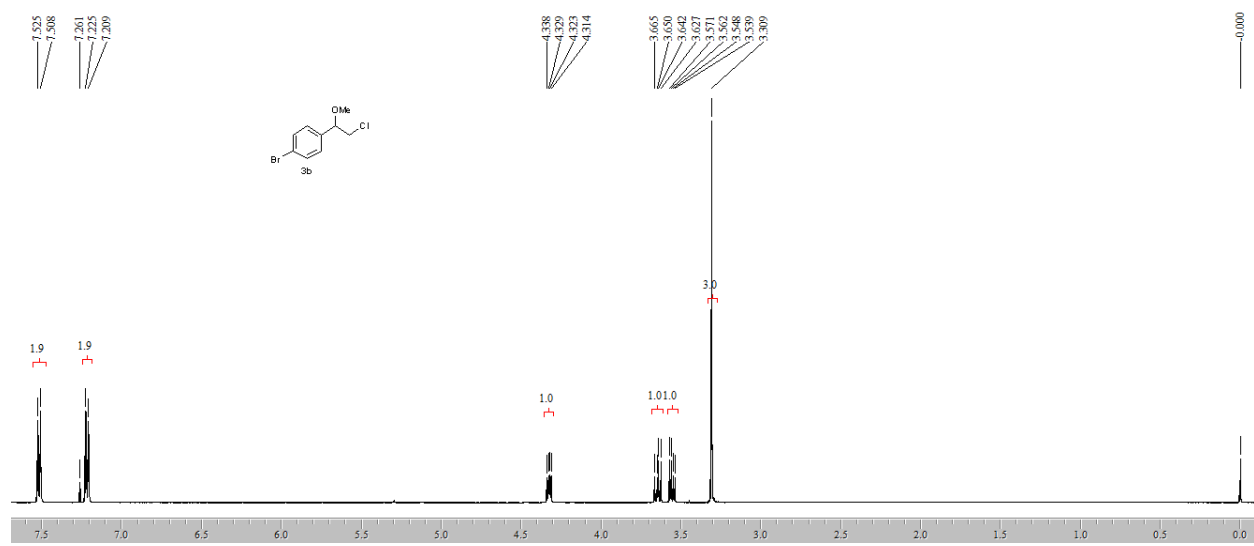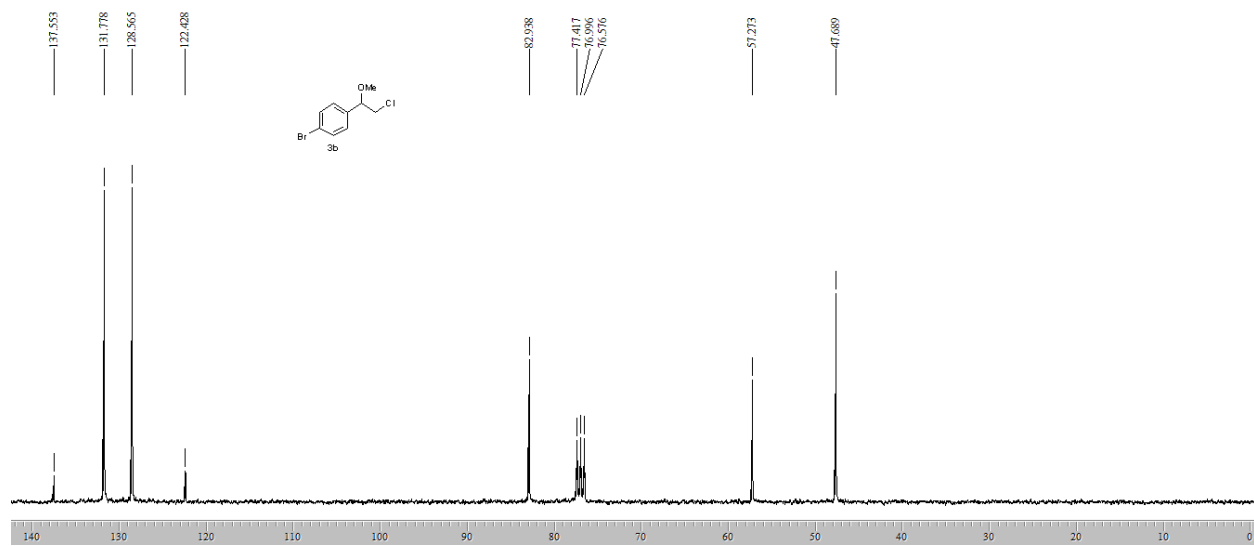

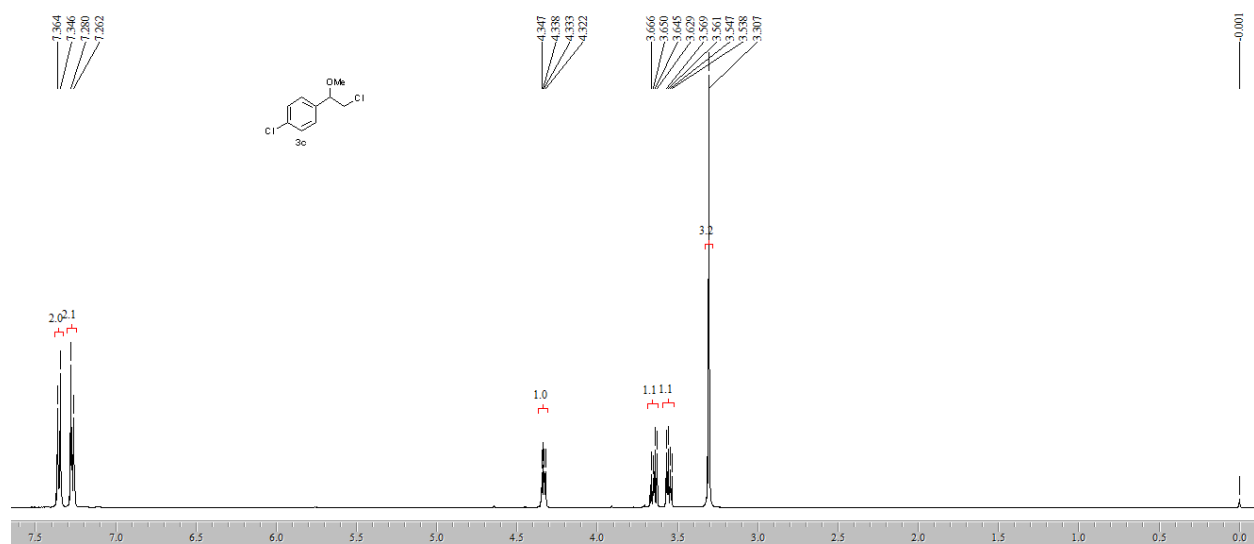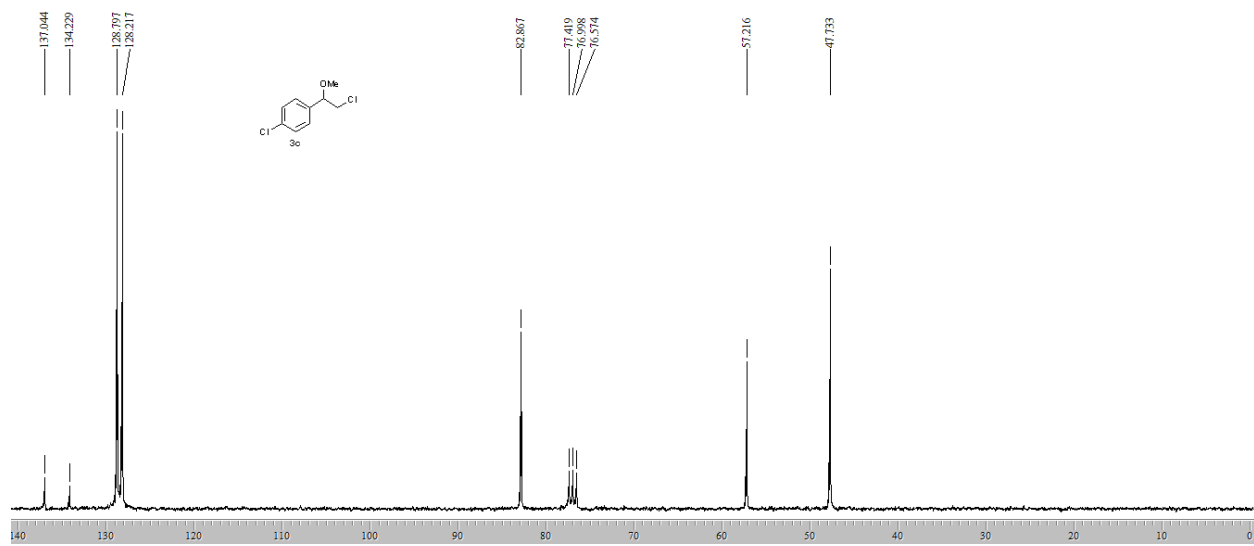

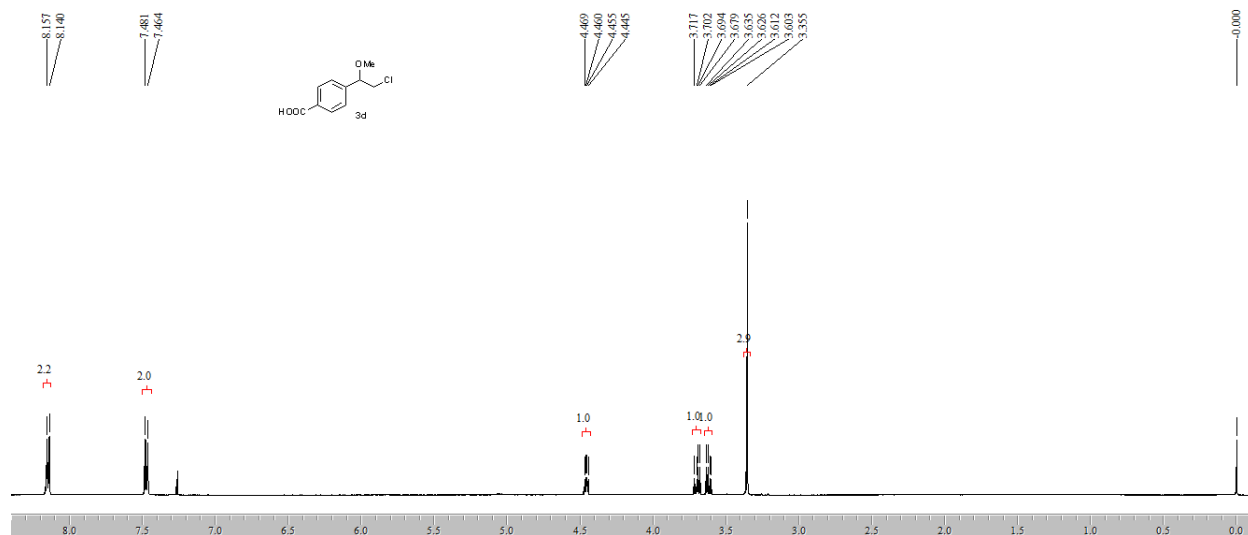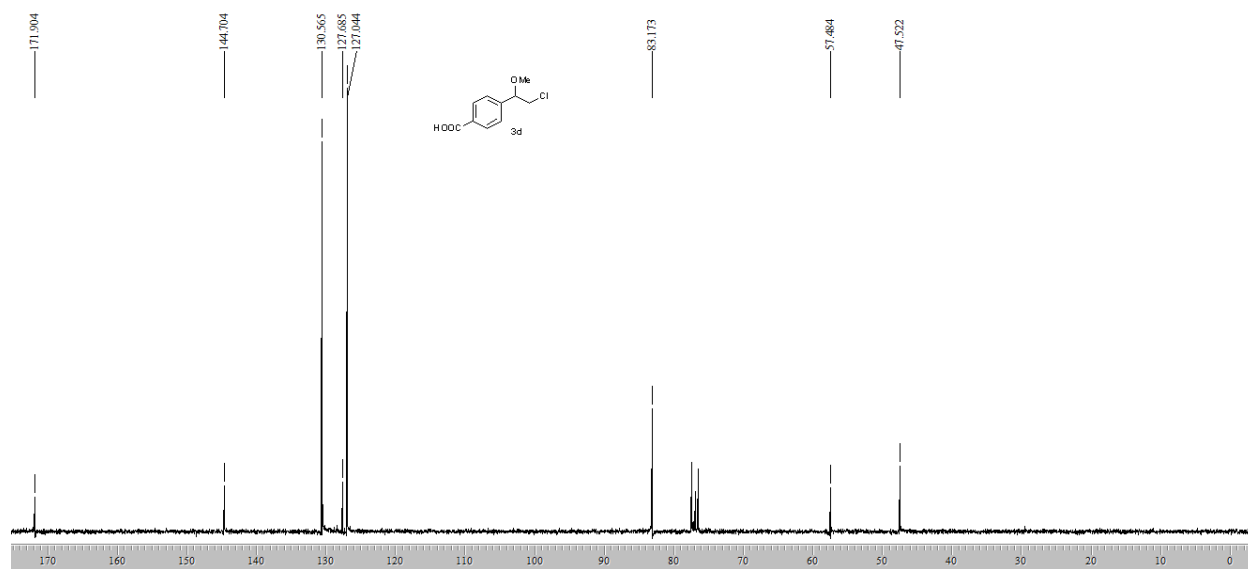

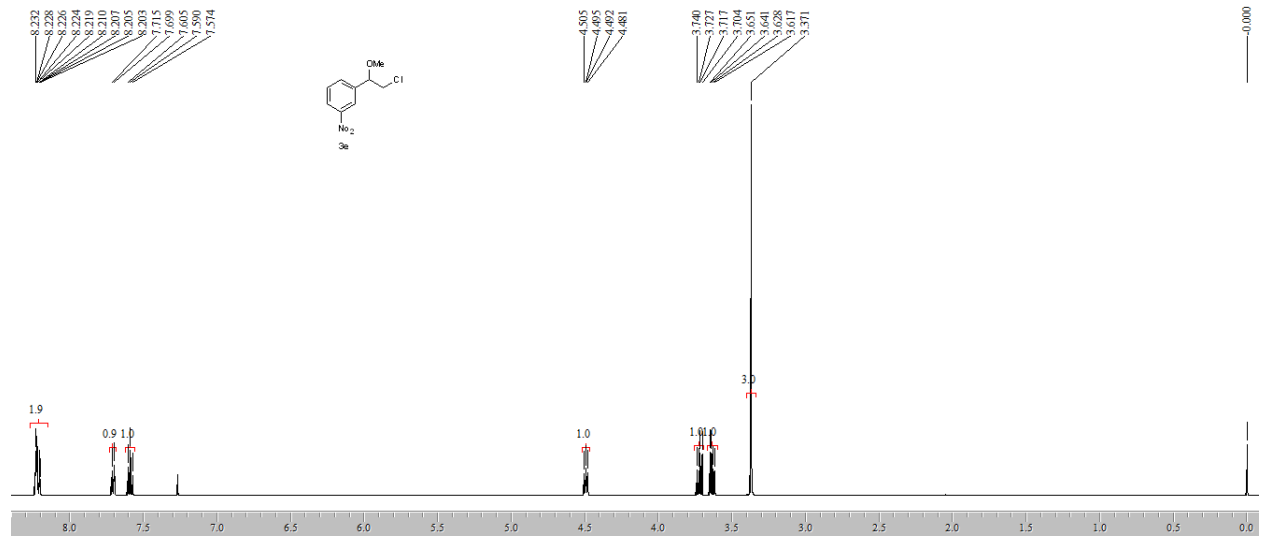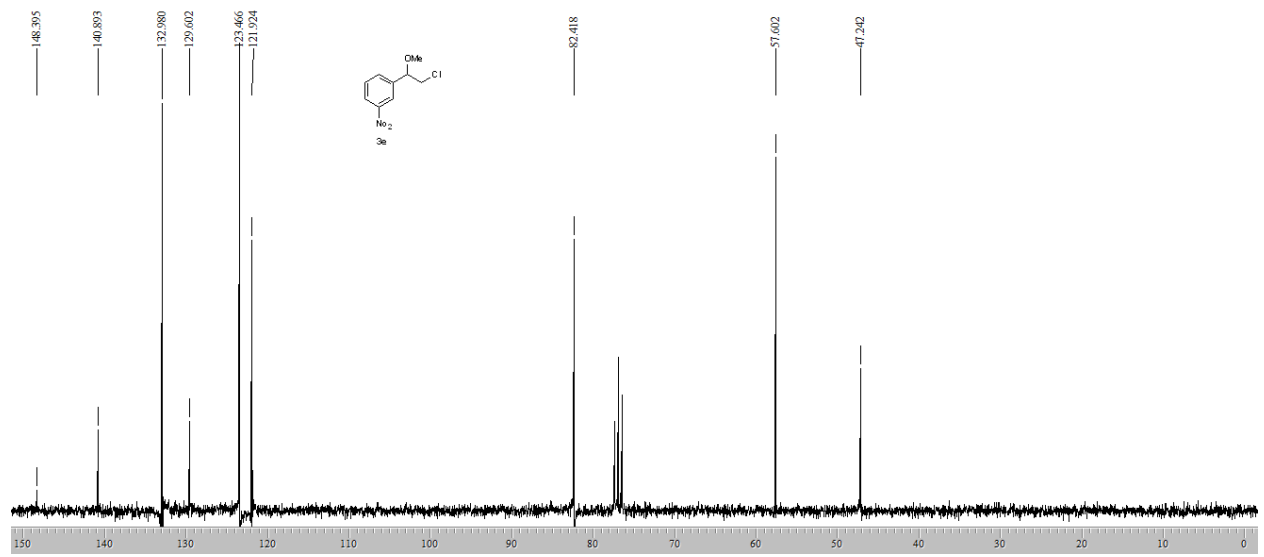

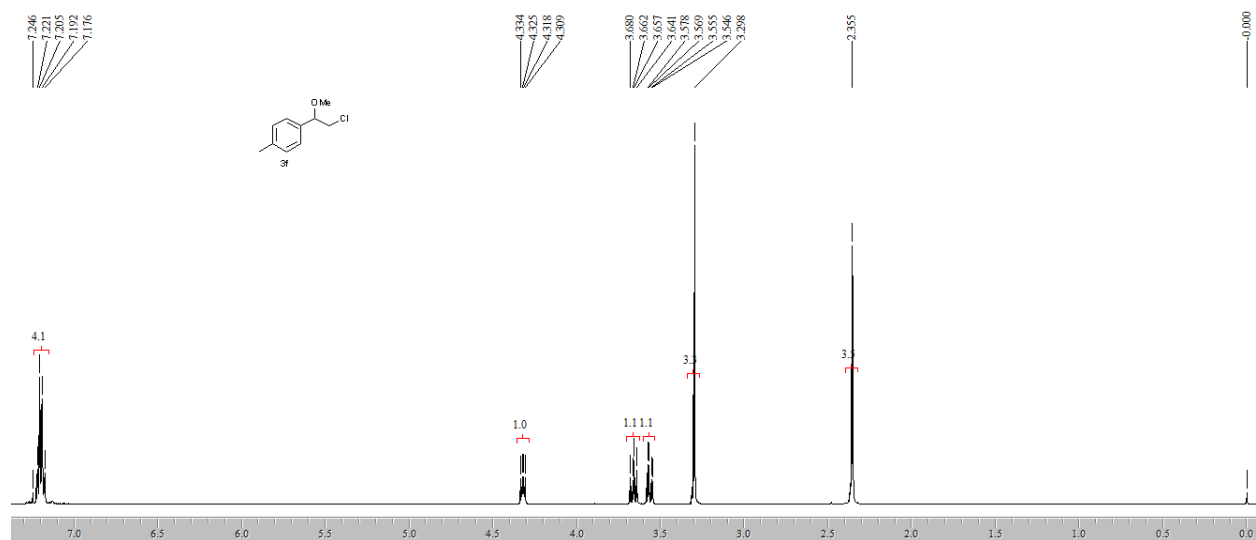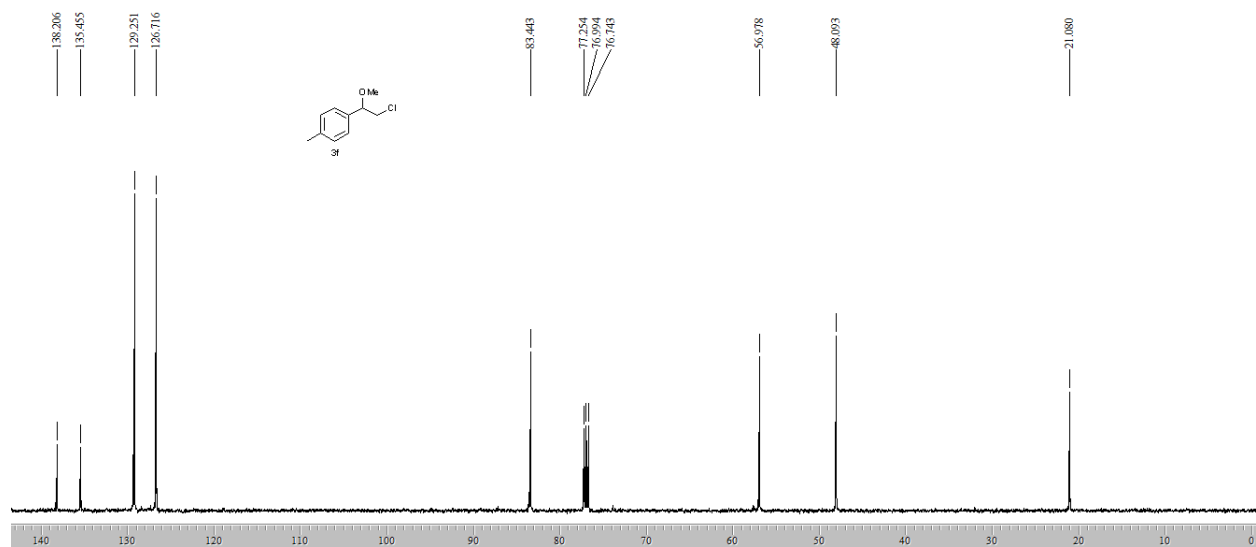

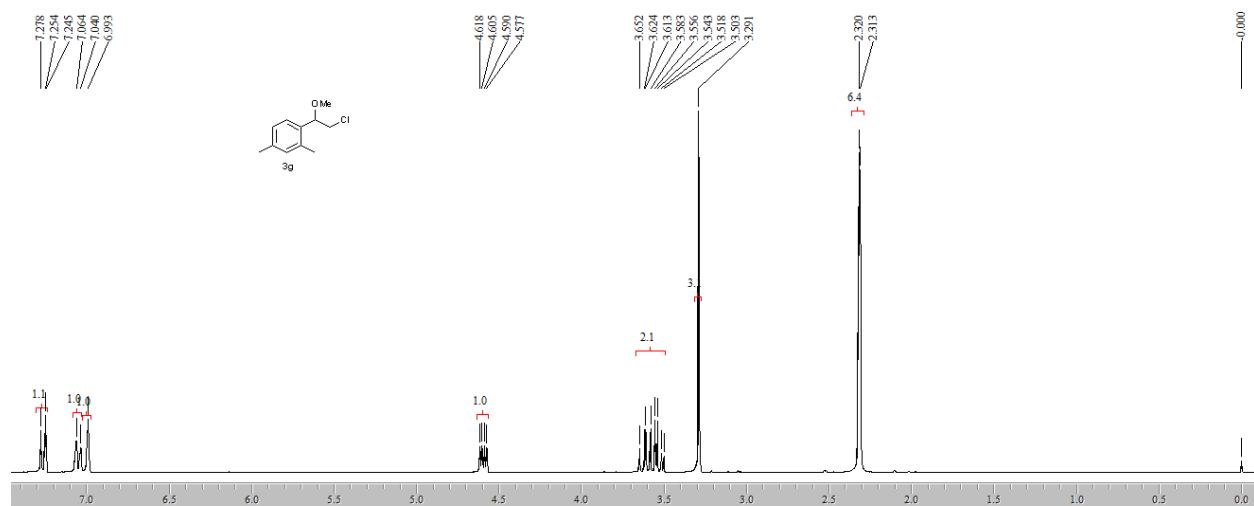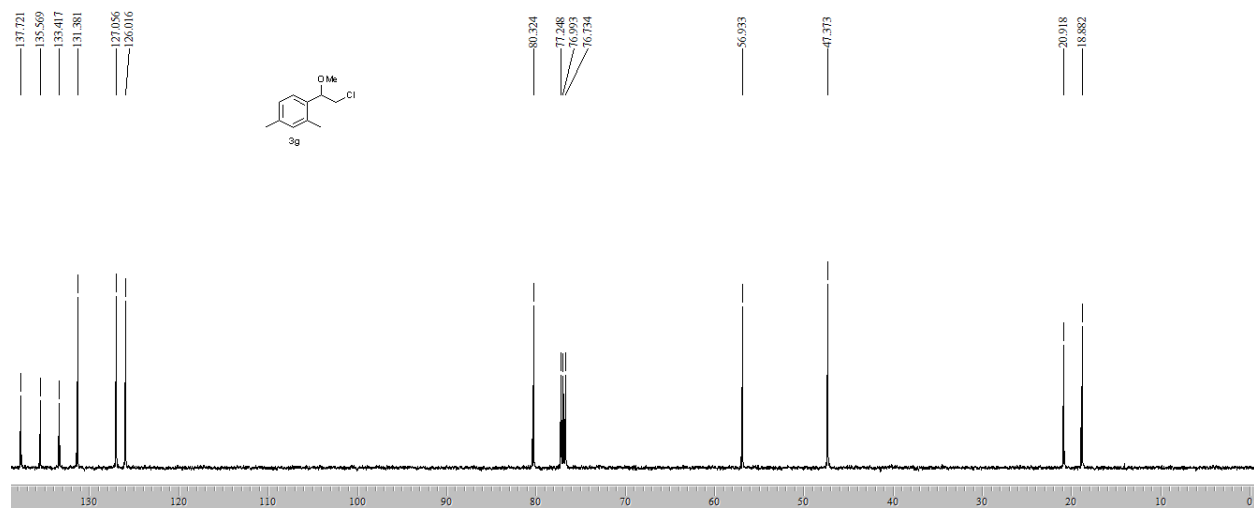

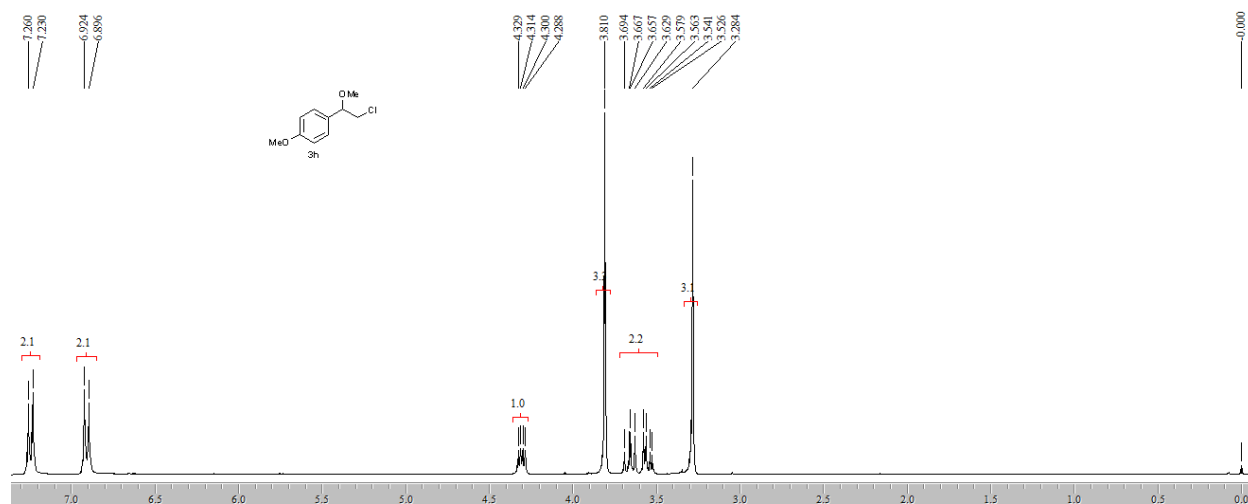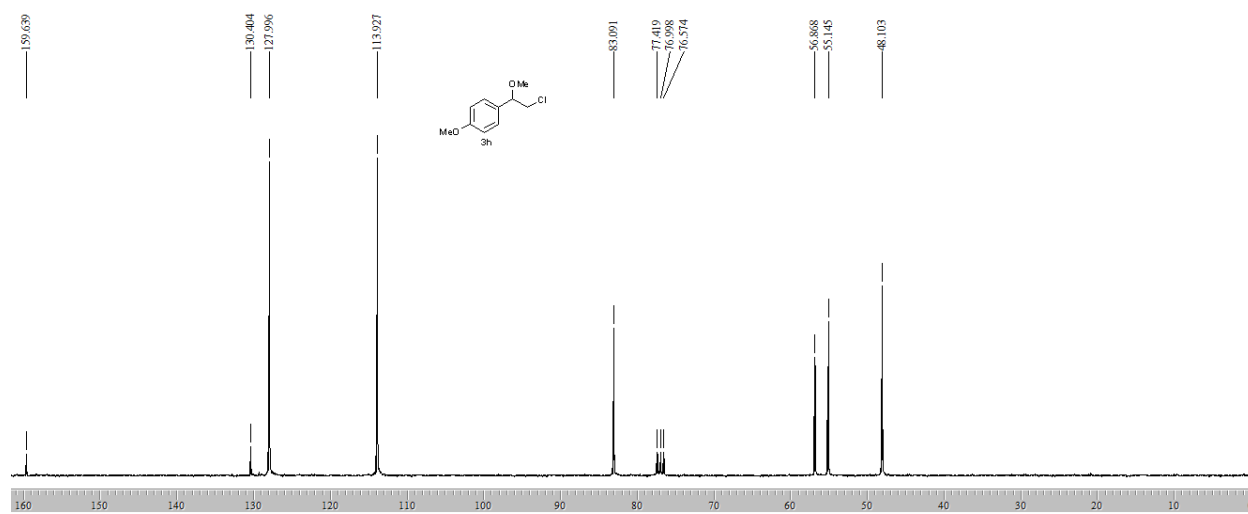

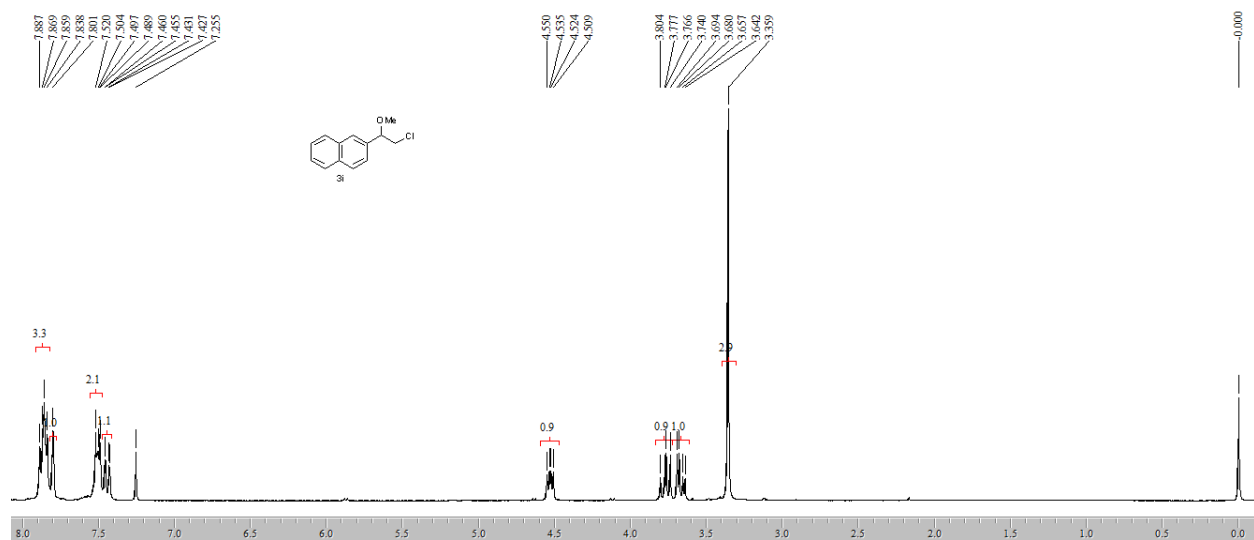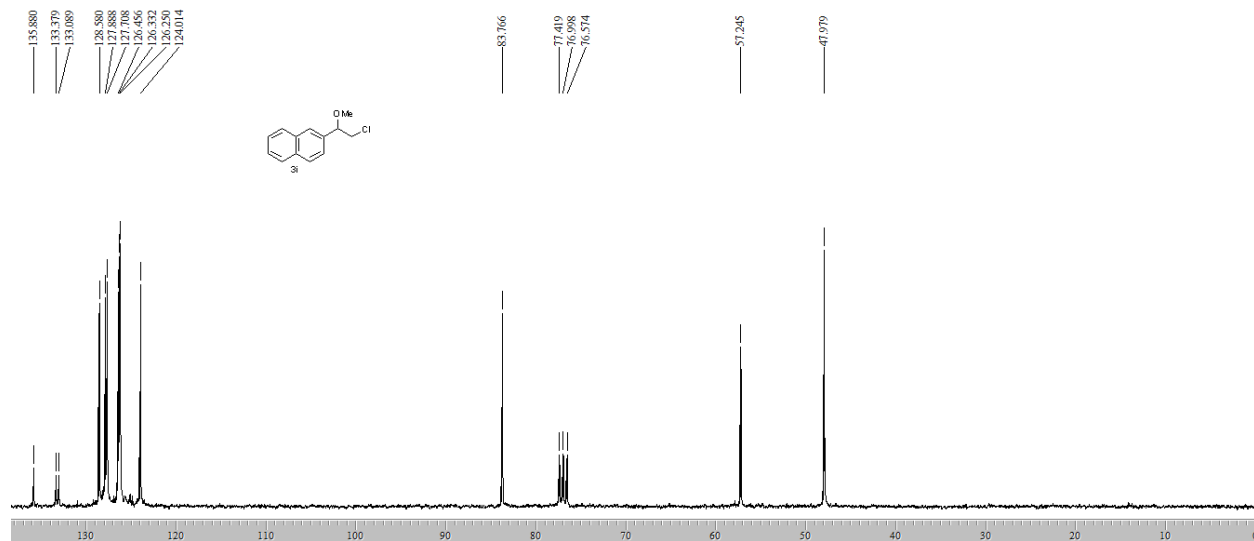



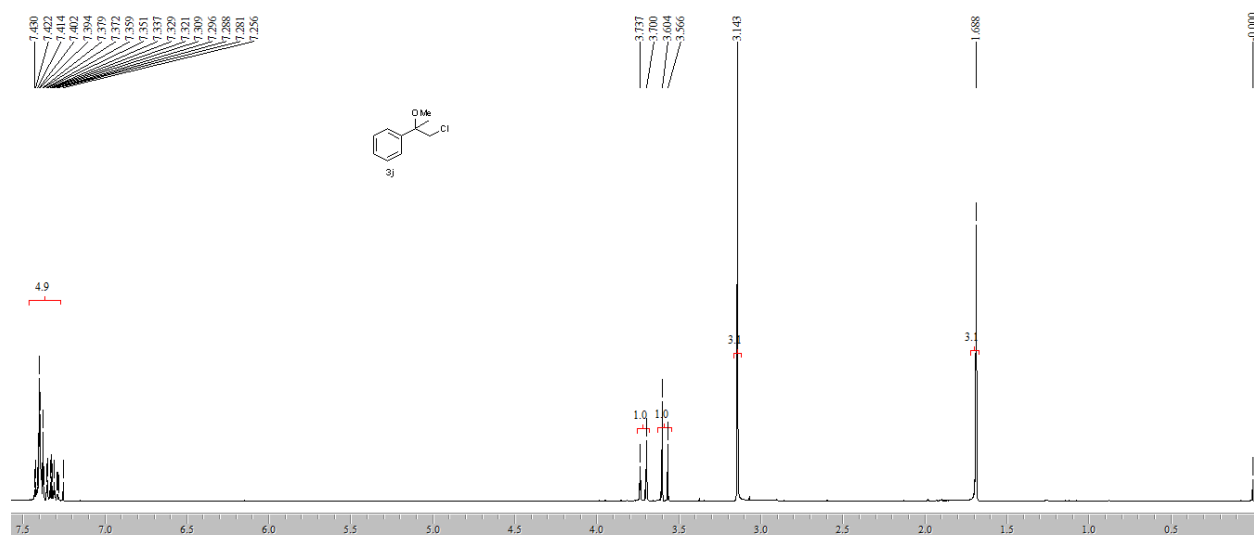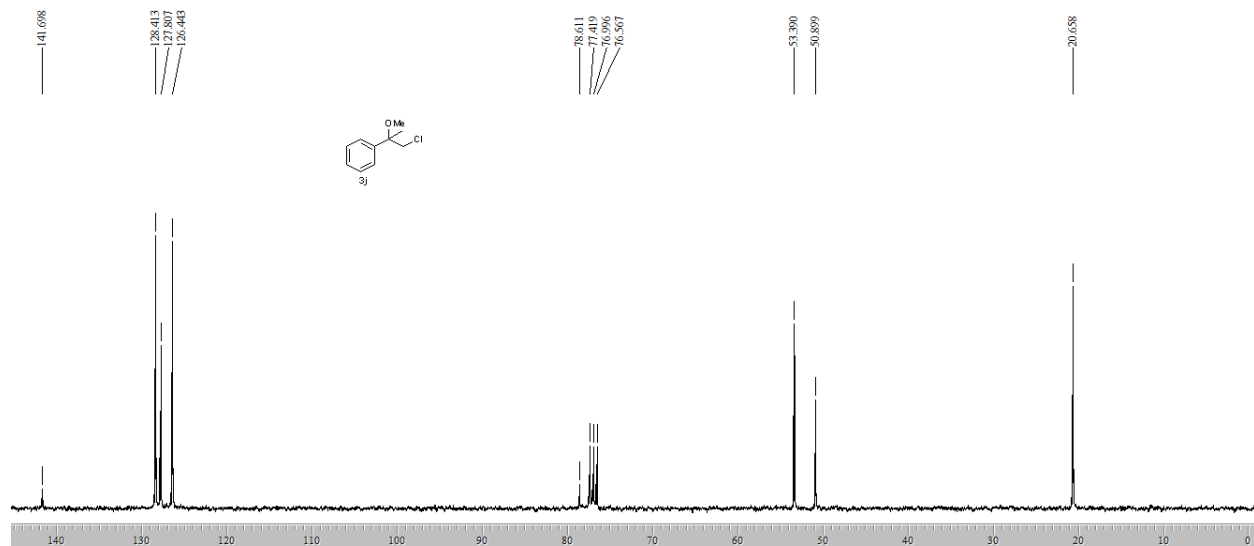

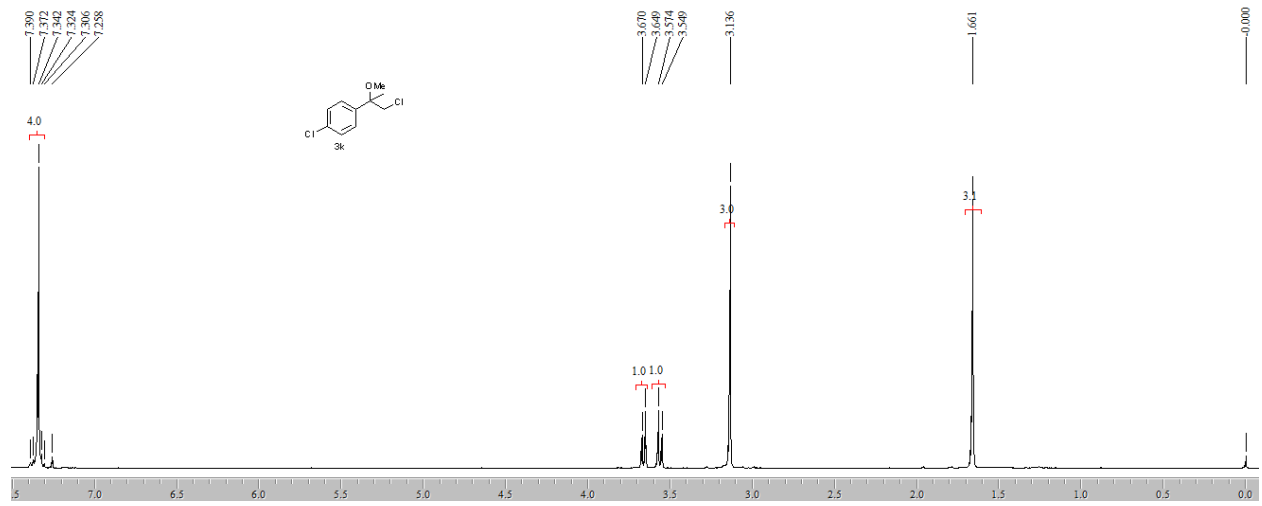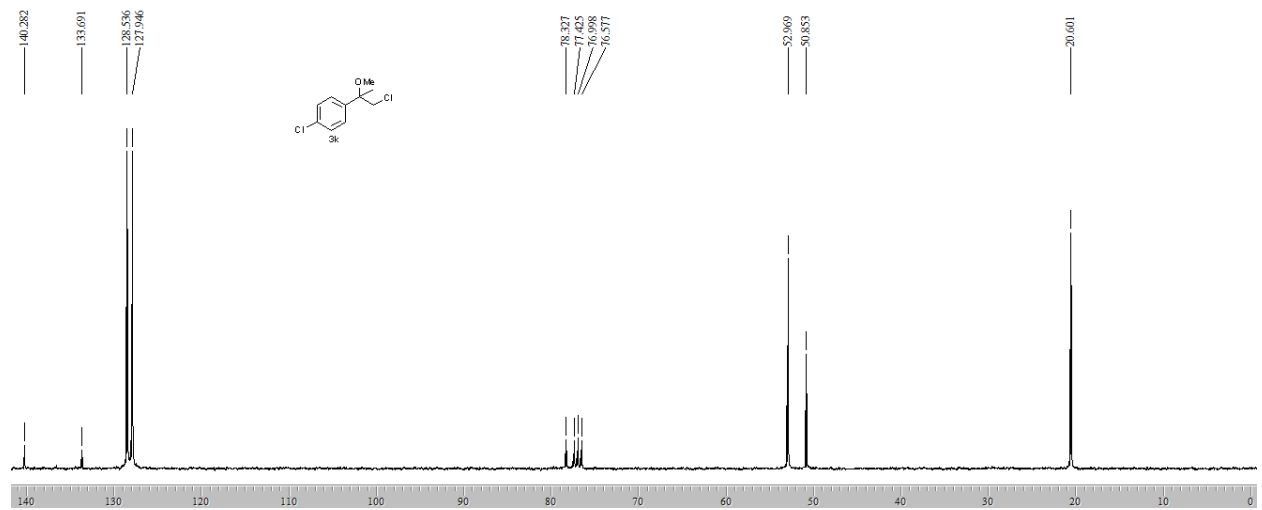

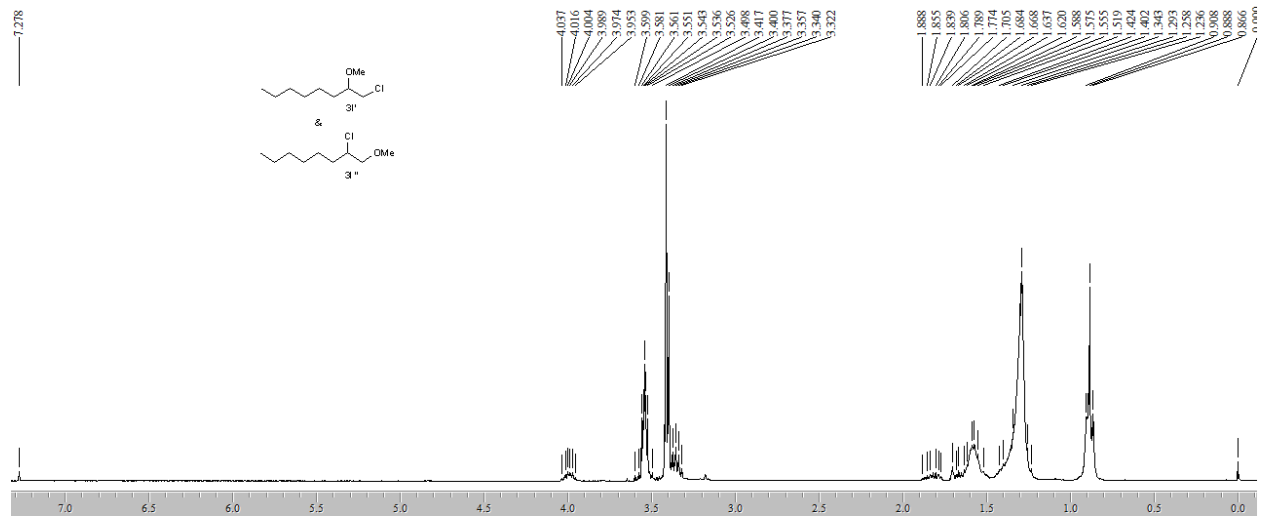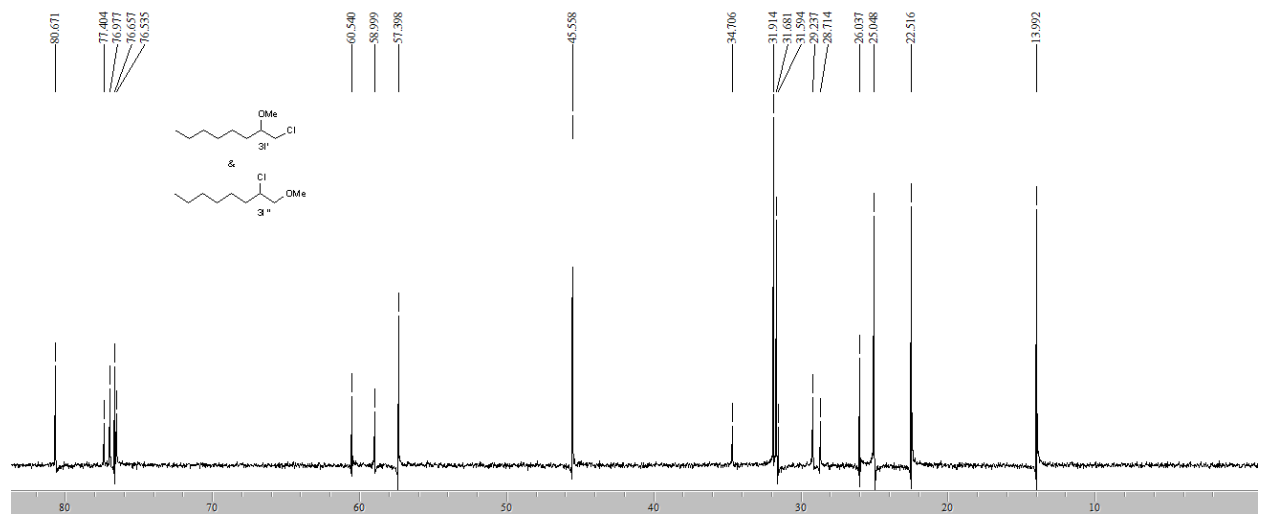

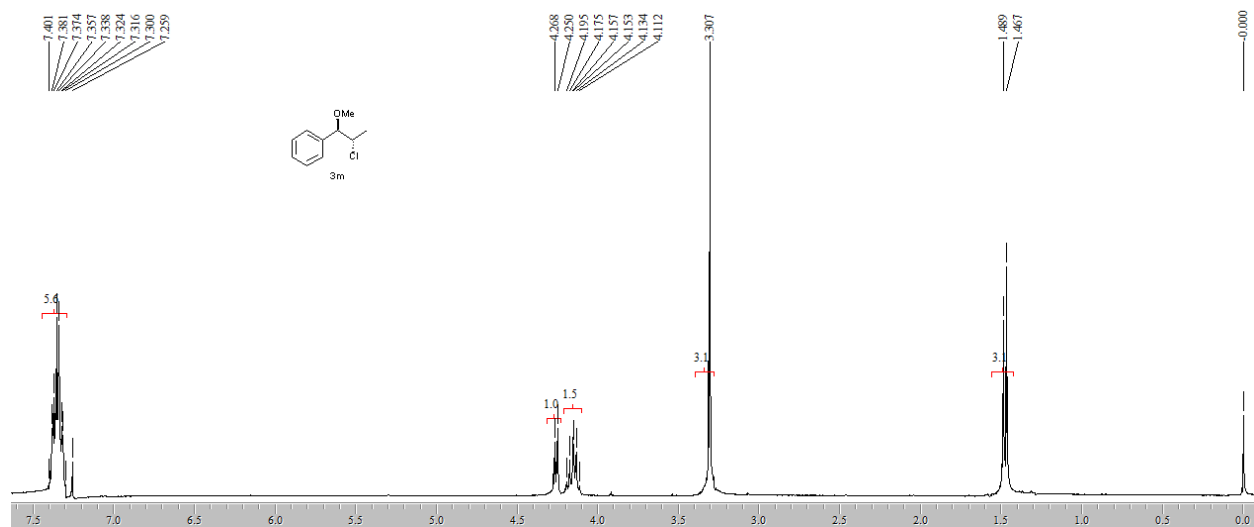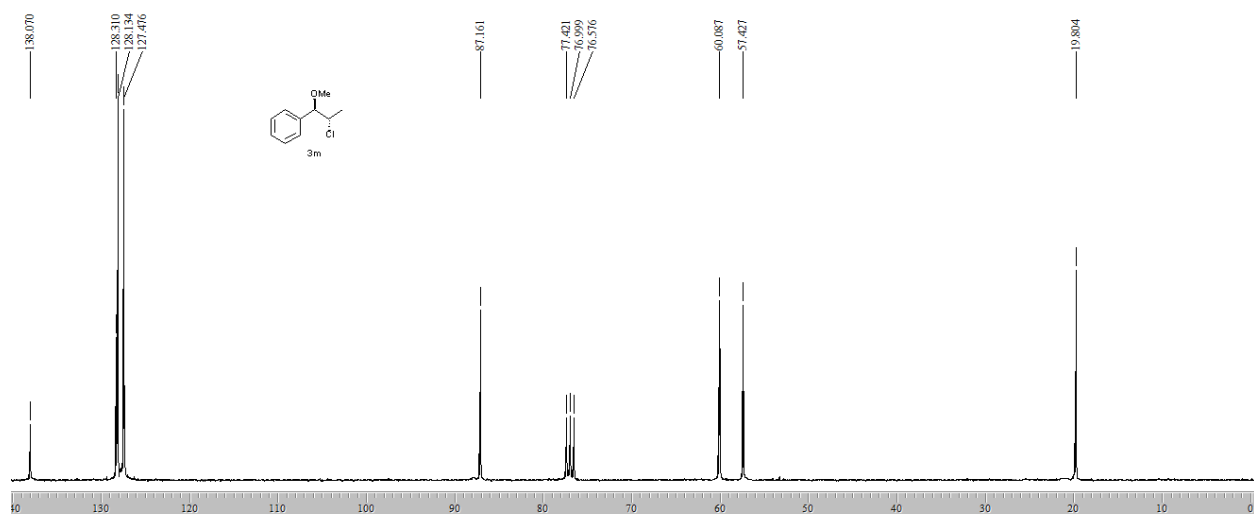

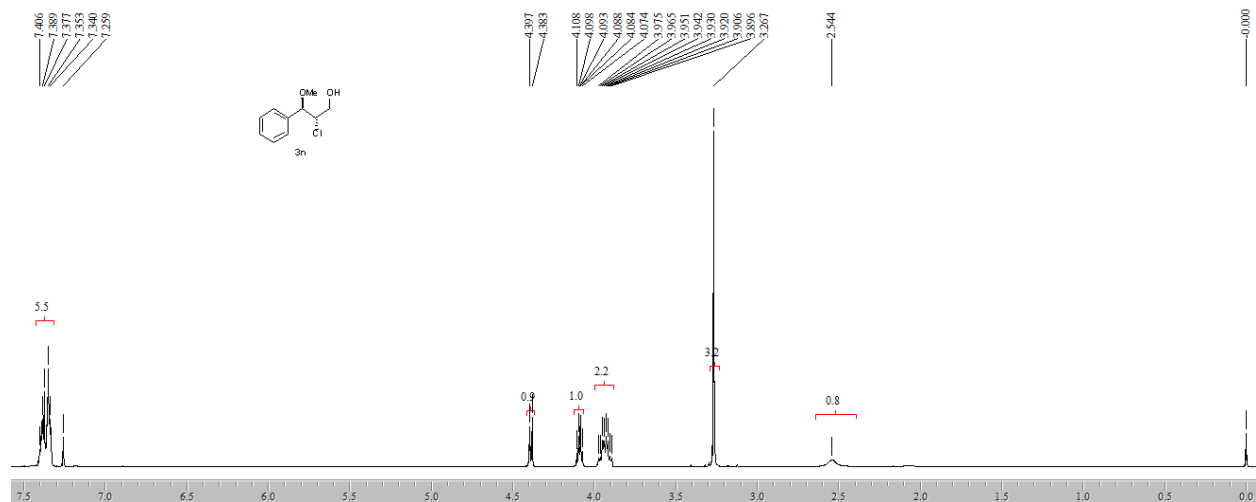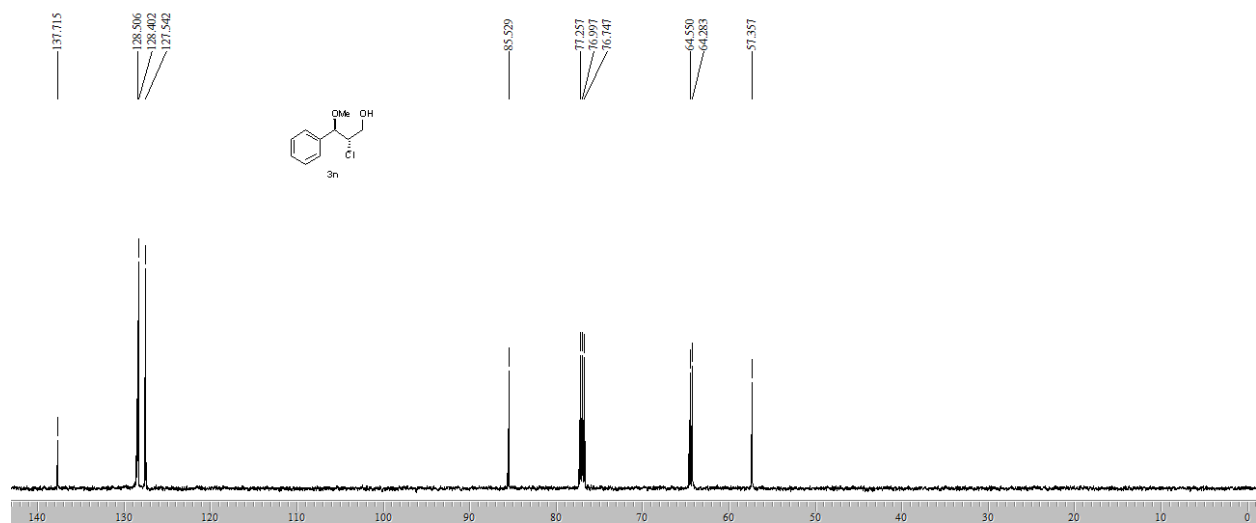

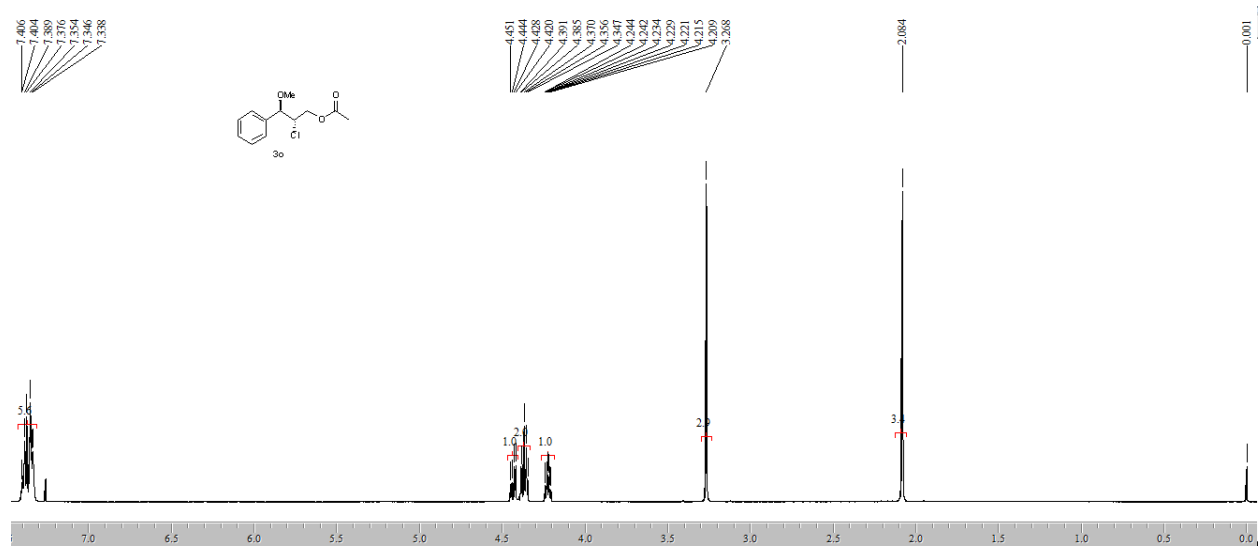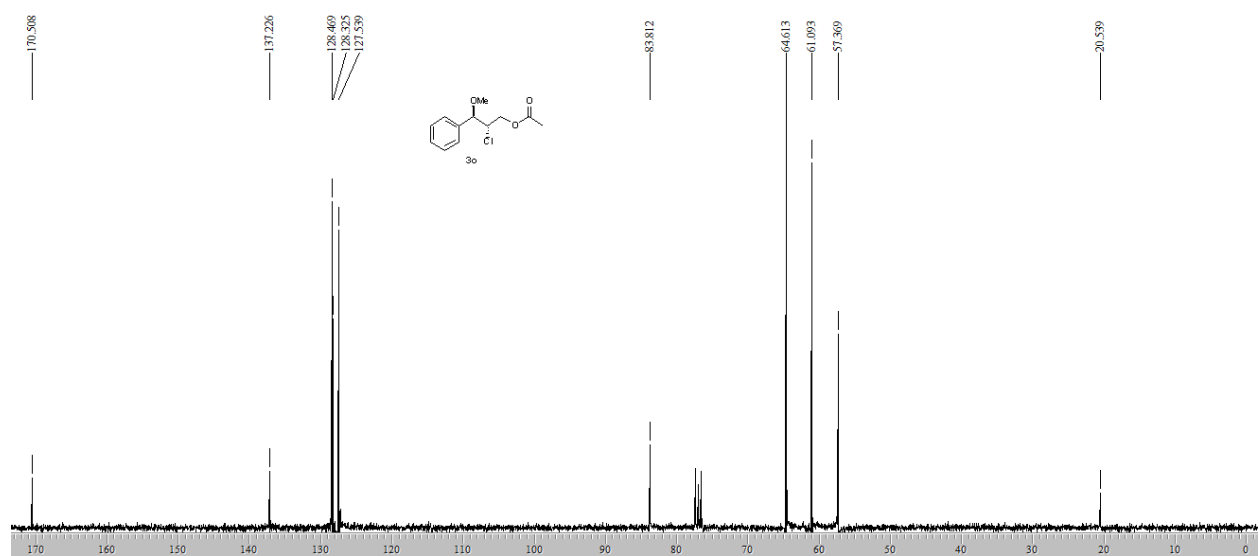

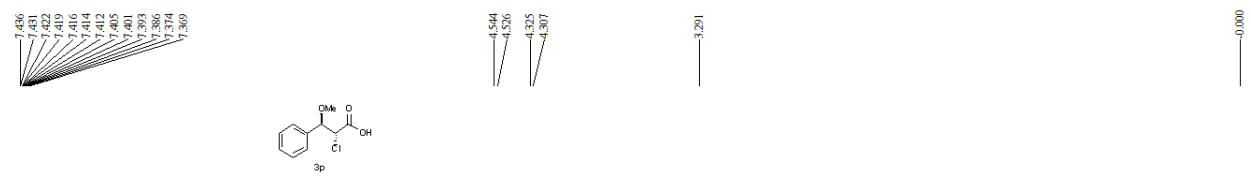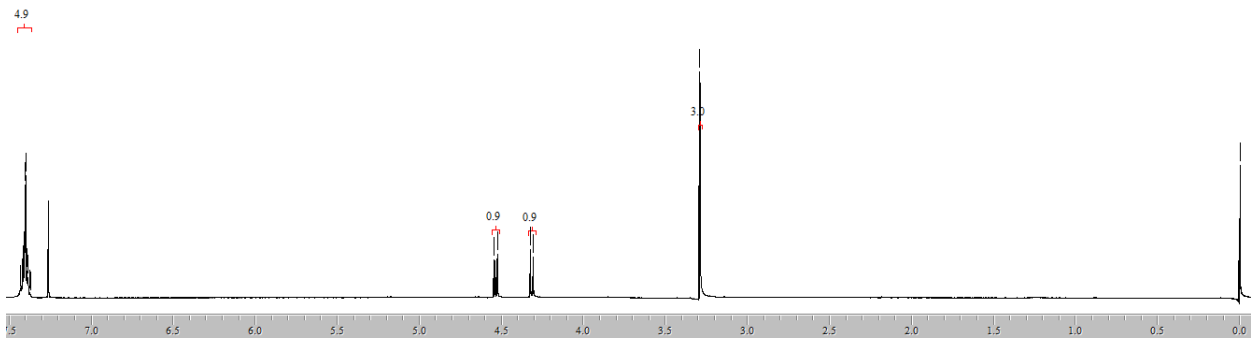

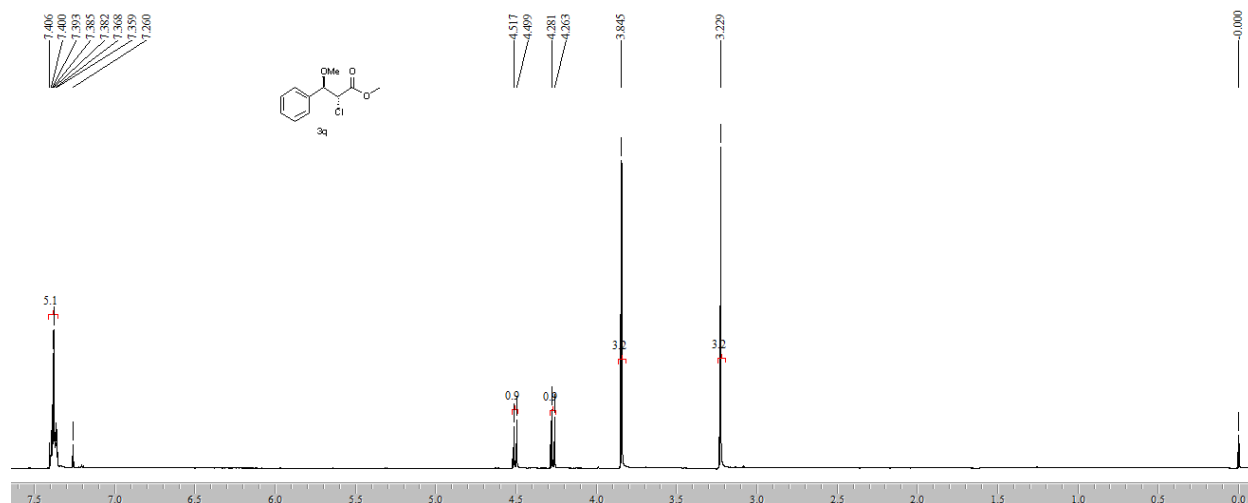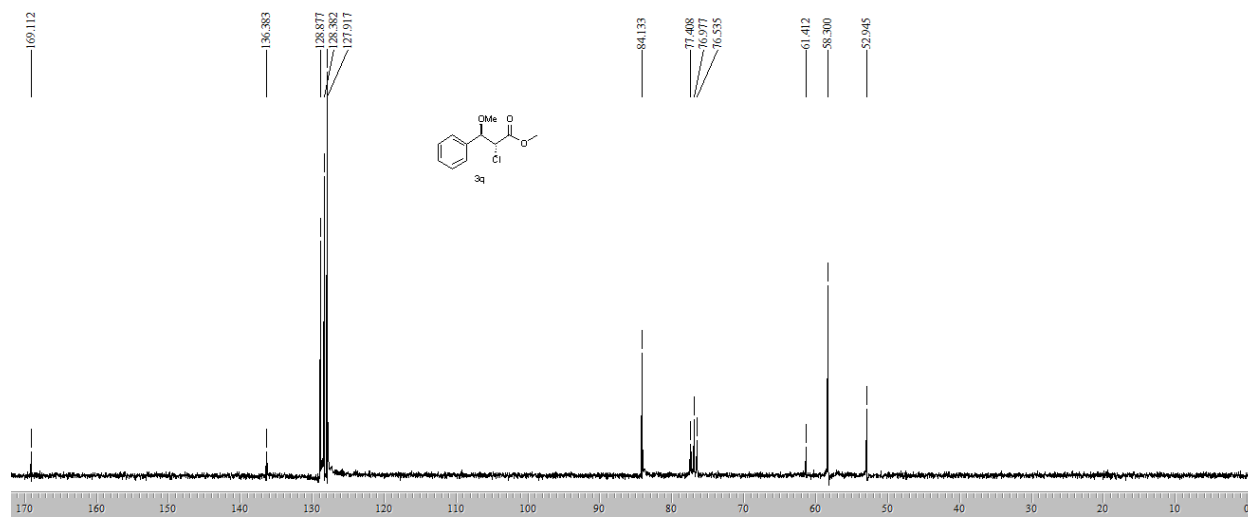



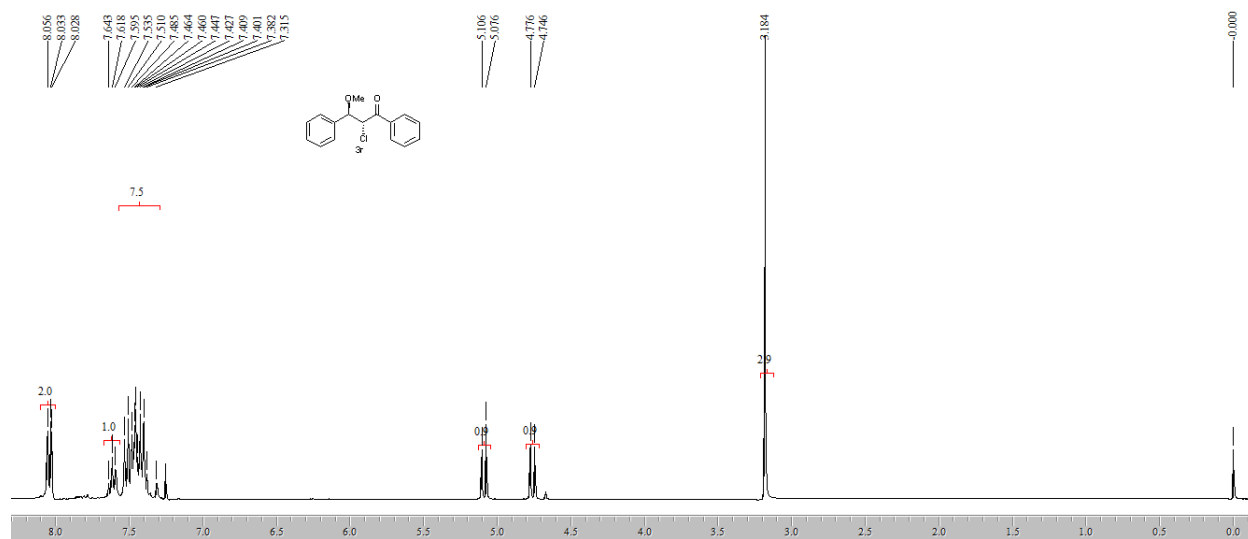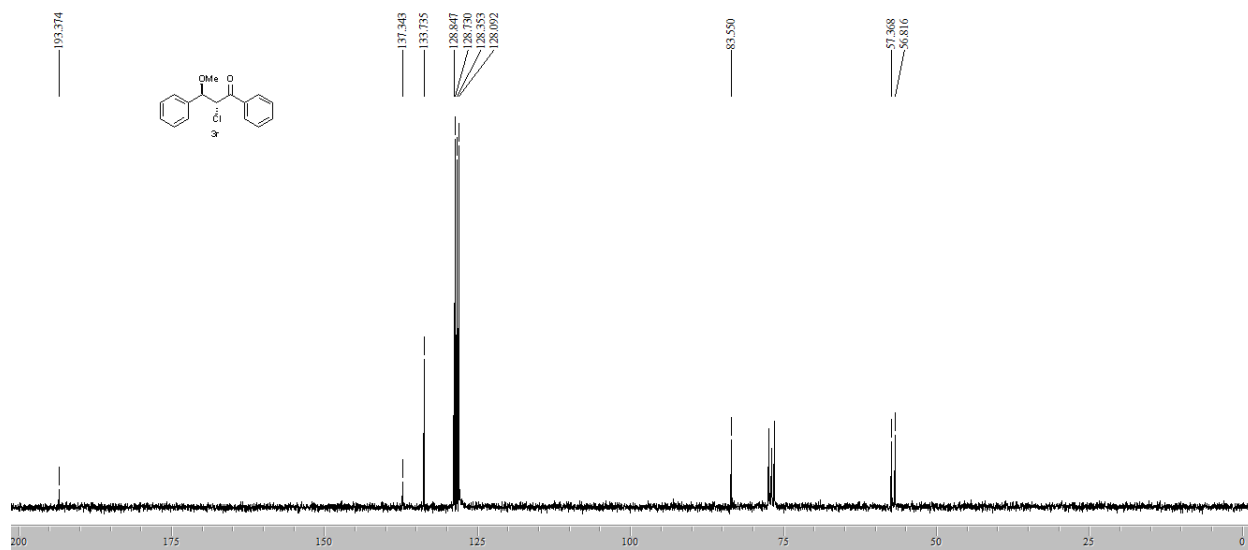

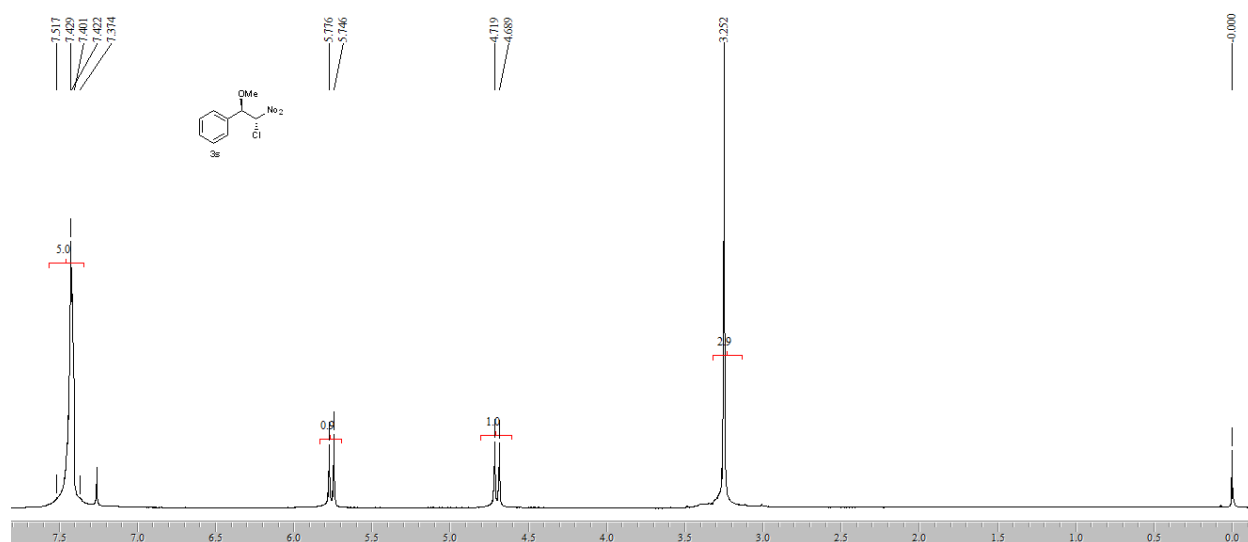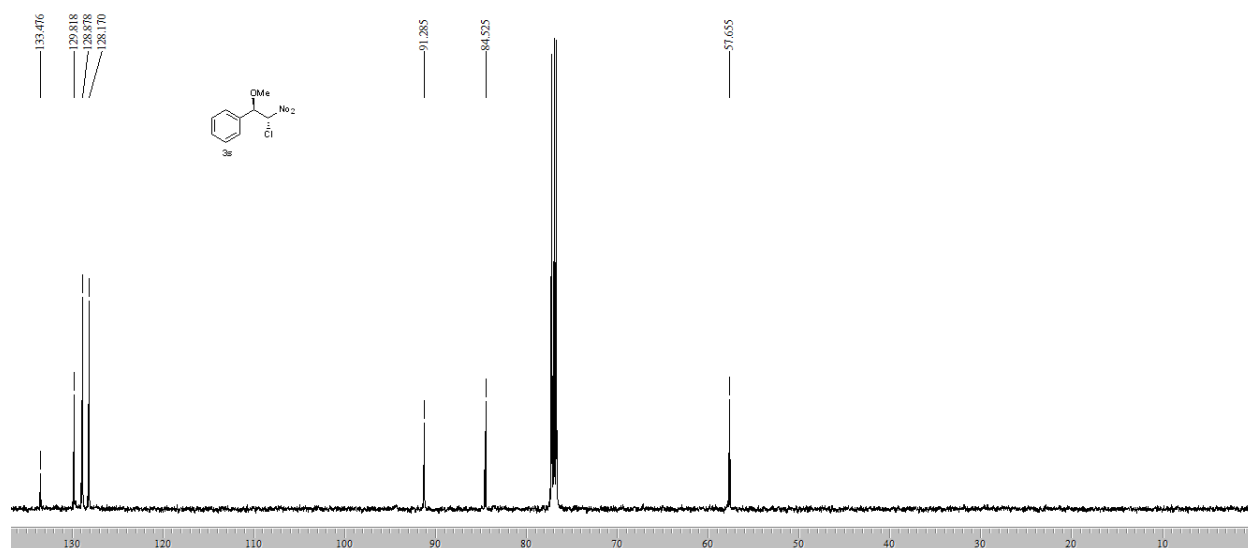

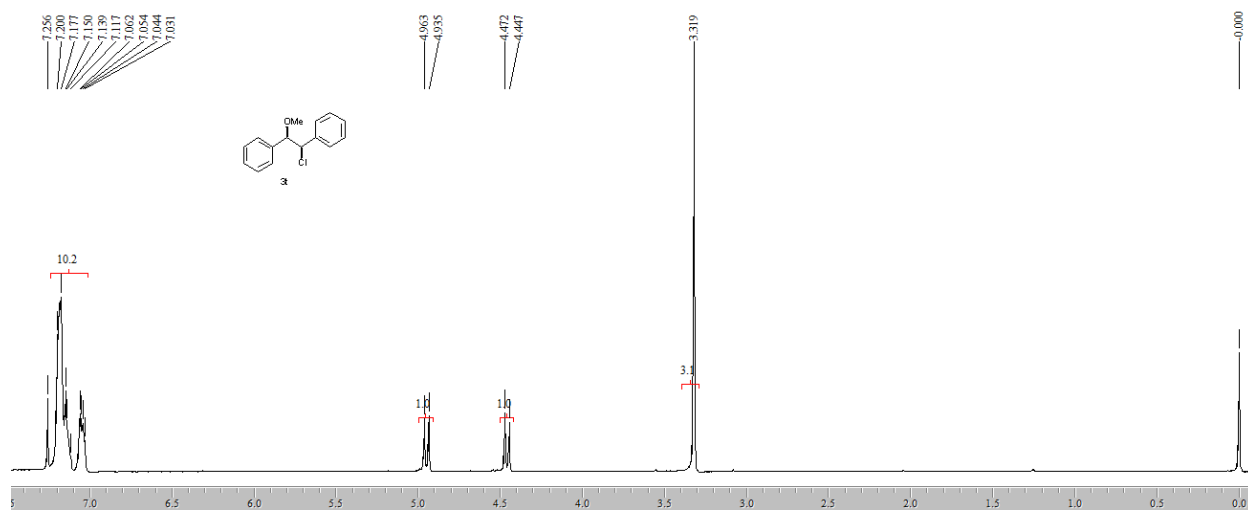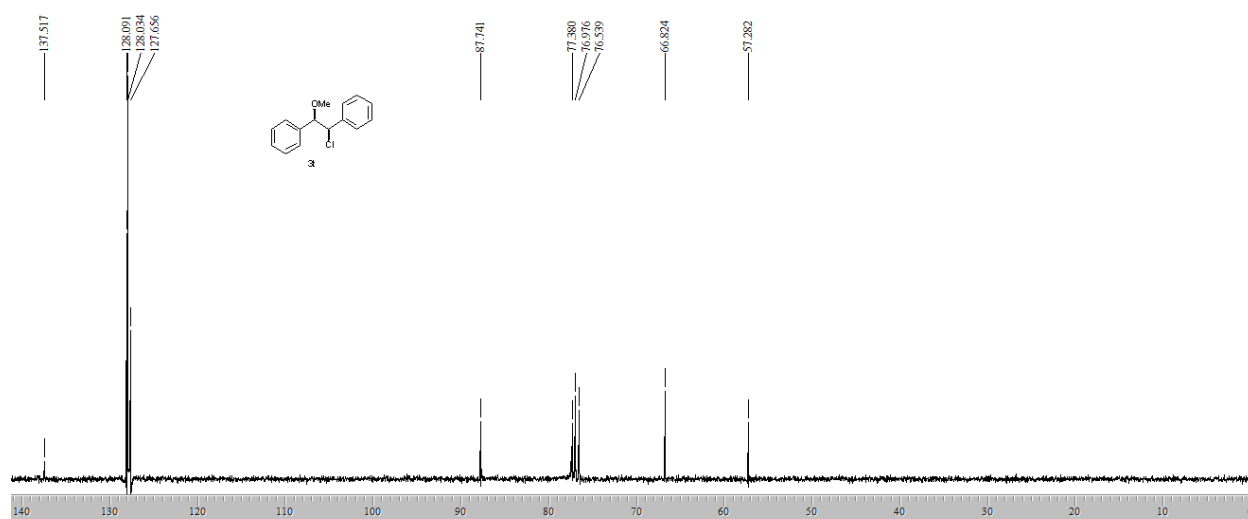

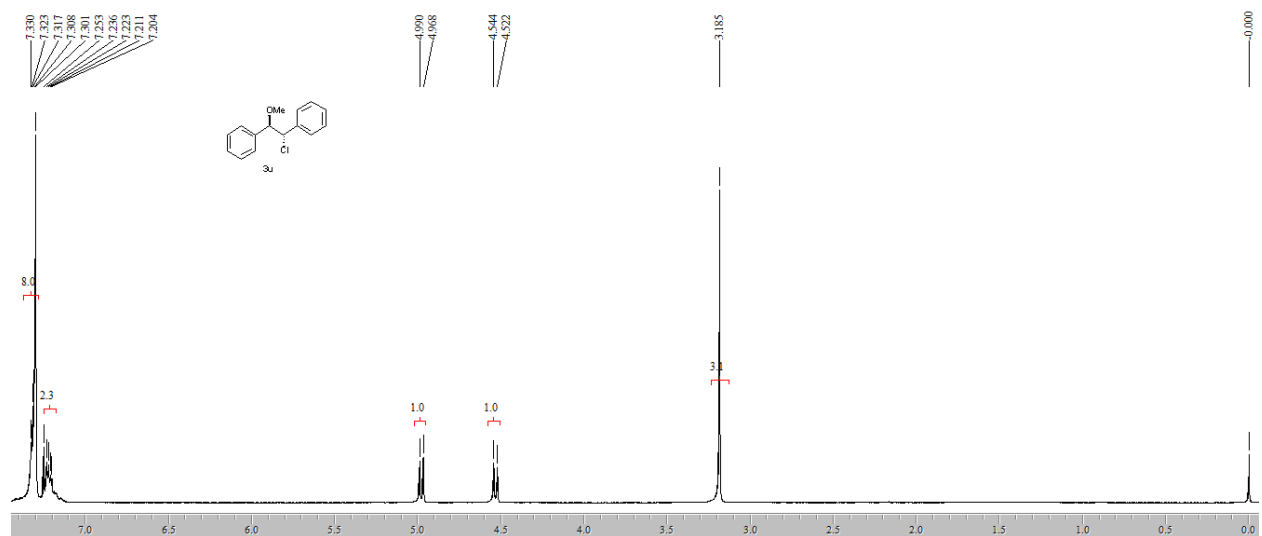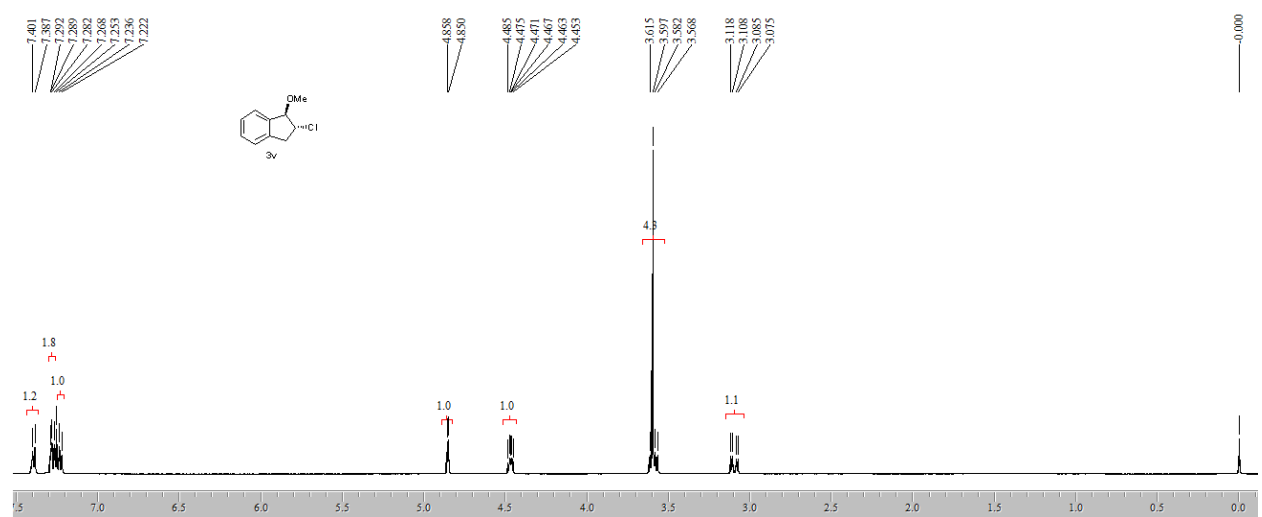

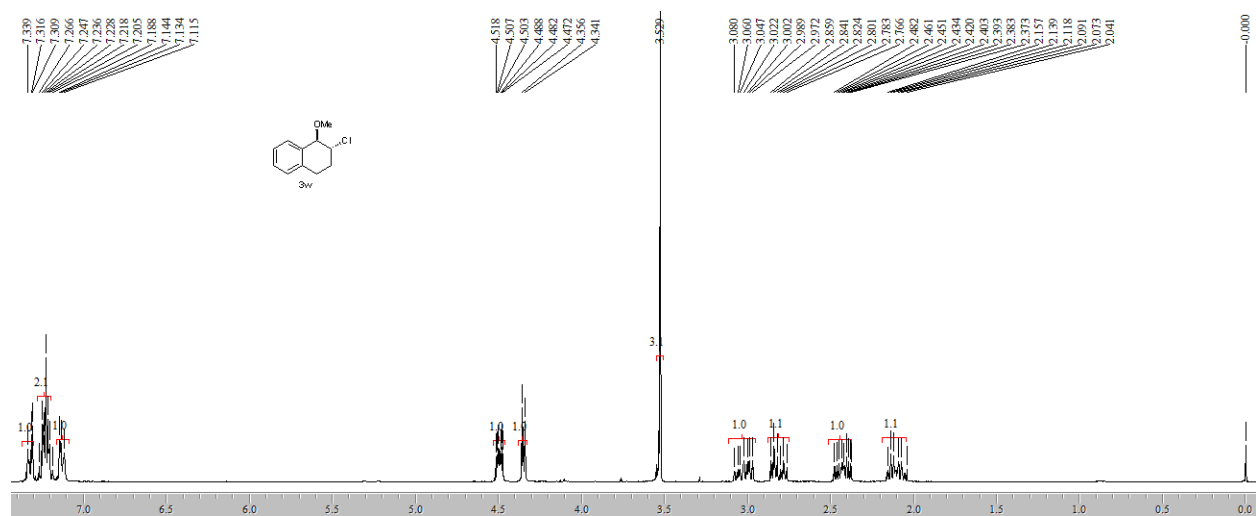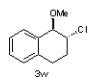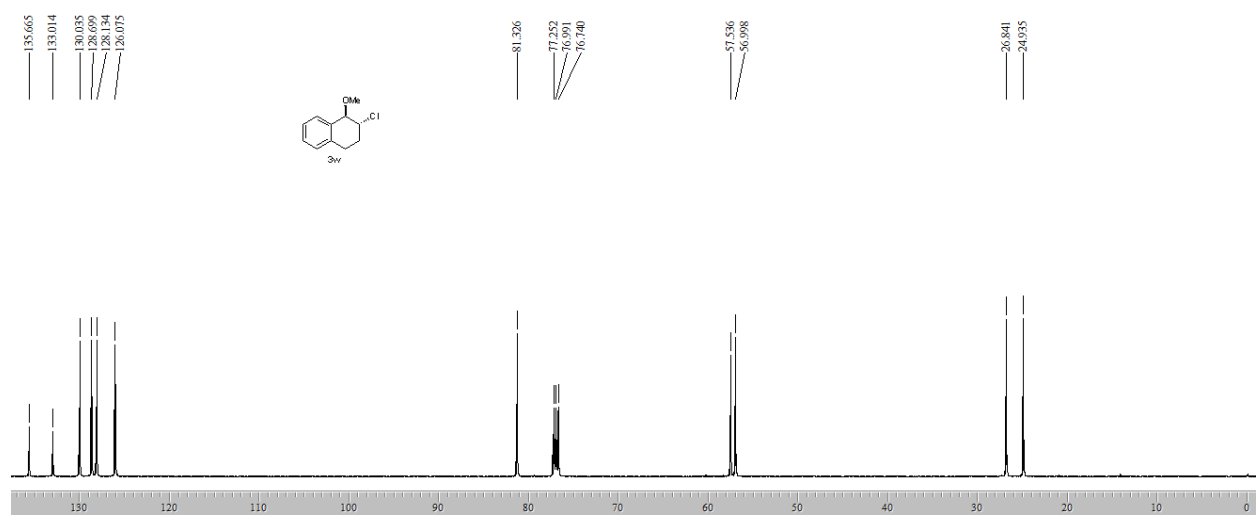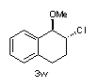

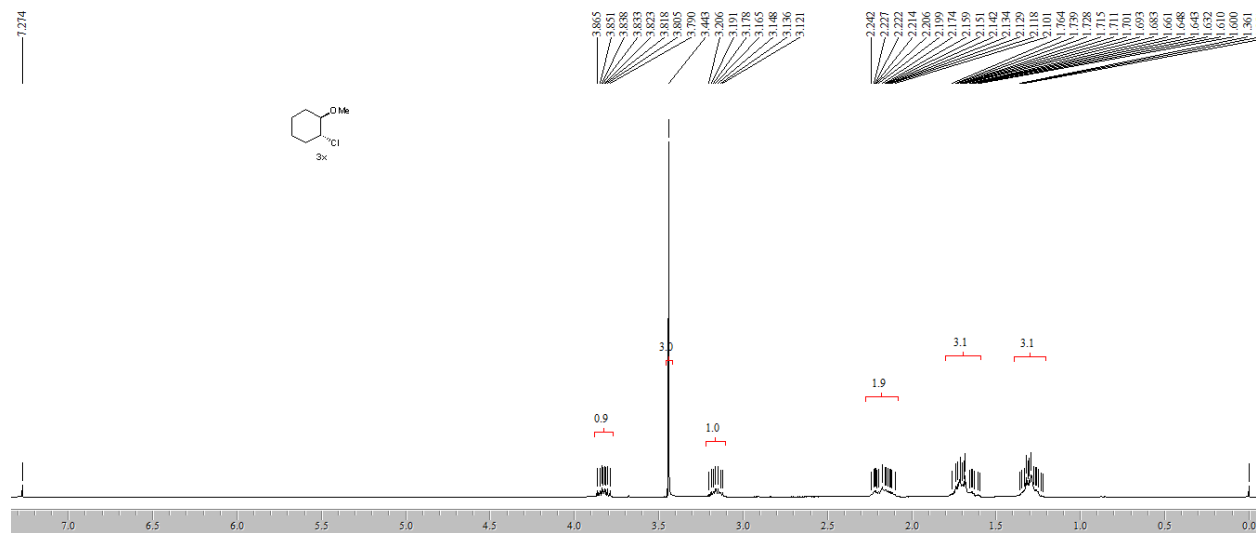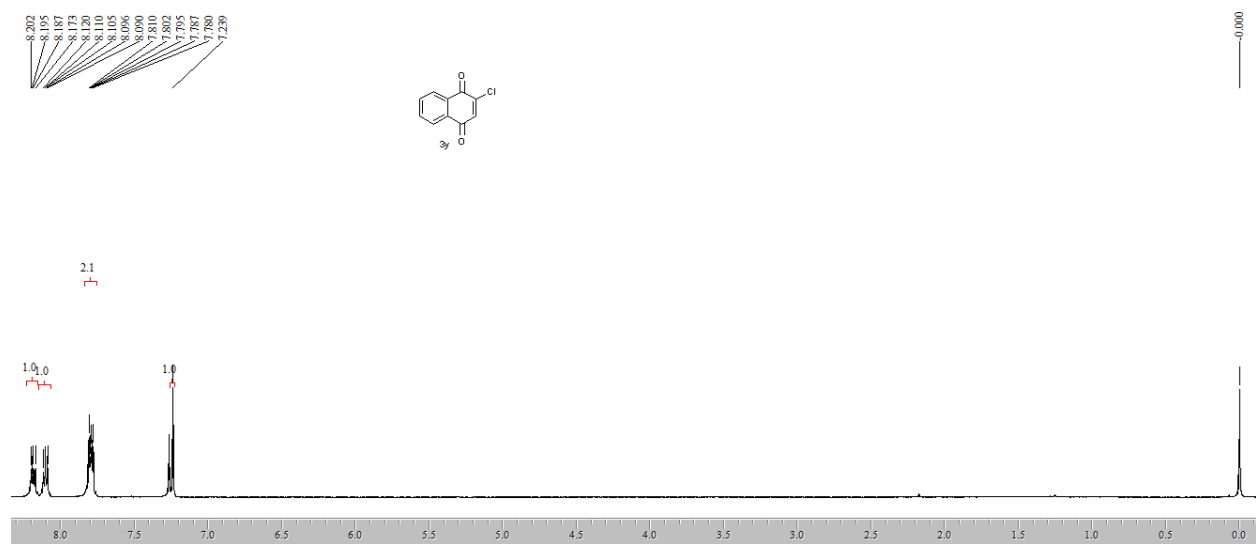

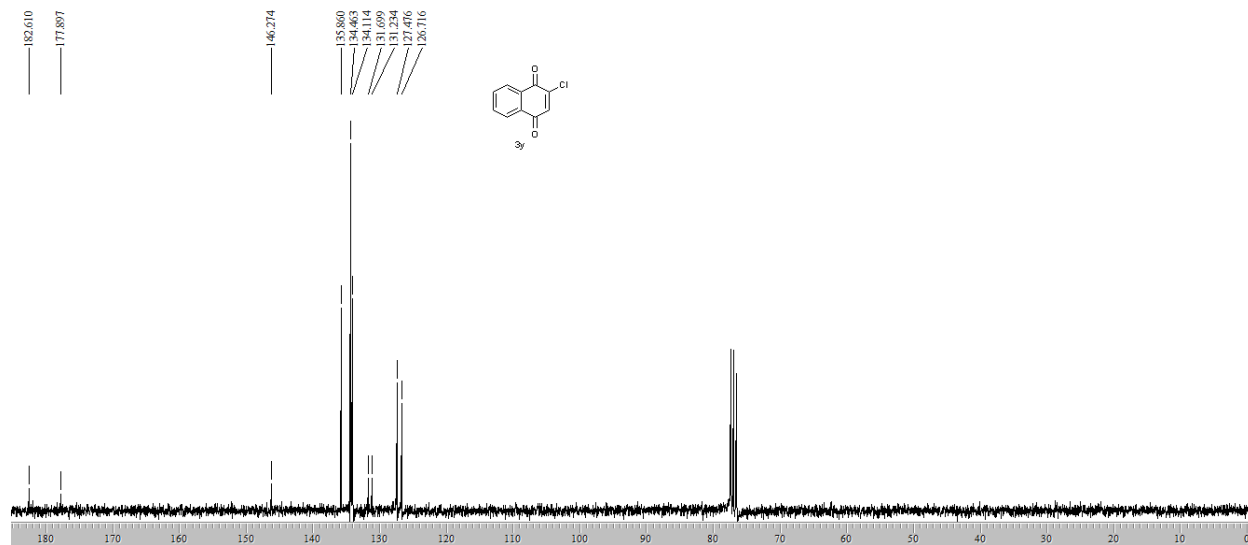

## Notes and references

- 1 J. Zhang, J. Wang, Z. Qiu and Y. Wang, *Tetrahedron*, 2011, **67**, 6859.
- 2 A. Träff, K. Bogár, M. Warner and J. -E. Bäckväll, *Org. Lett.*, 2008, **10**, 4807.
- 3 G. F. Mendonça, A. M. Sanseverino and M. C. S. Mattos, *Synthesis*, 2003, 45.
- 4 P. A. Bentley, Y. Mei and J. Du, *Tetrahedron Lett.*, 2008, **49**, 1425.
- 5 P. Besse, M. F. Renard and H. Veschambre, *Tetrahedron: Asymmetry*, 1994, **5**, 1249.
- 6 W. Adam, C. Mock-Knoblauch, C. R. Saha-Möller and M. Herderich, *J. Am. Chem. Soc.*, 2000, **122**, 9685.
- 7 A. McCluskey, S. K. Leitch, J. Garner, C. E. Caden, T. A. Hill, L. R. Odell and S. G. Stewart, *Tetrahedron Lett.*, 2005, **46**, 8229.
- 8 P. A. Bentley, Y. Mei and J. Du, *Tetrahedron Lett.*, 2008, **49**, 2653.
- 9 M. C. Cabaleiro, N. N. Giagante and M. A. León, *Tetrahedron*, 1977, **33**, 1159-1161.
- 10 S. Neufeind, N. Hülsken, J.-M. Neudörfl, N. Schlörer and H.-G. Schmalz, *Chem. Eur. J.*, 2011, **17**, 2633-2641.
